# Supplementary material for: Deviated and early unsustainable stunted development of gut microbiota in children with autism spectrum disorder
Source: HighWire-hosted journal article supplement (doi:10.1136/gutjnl-2021-325115), 2021-12-20

# FigureS1

**A**

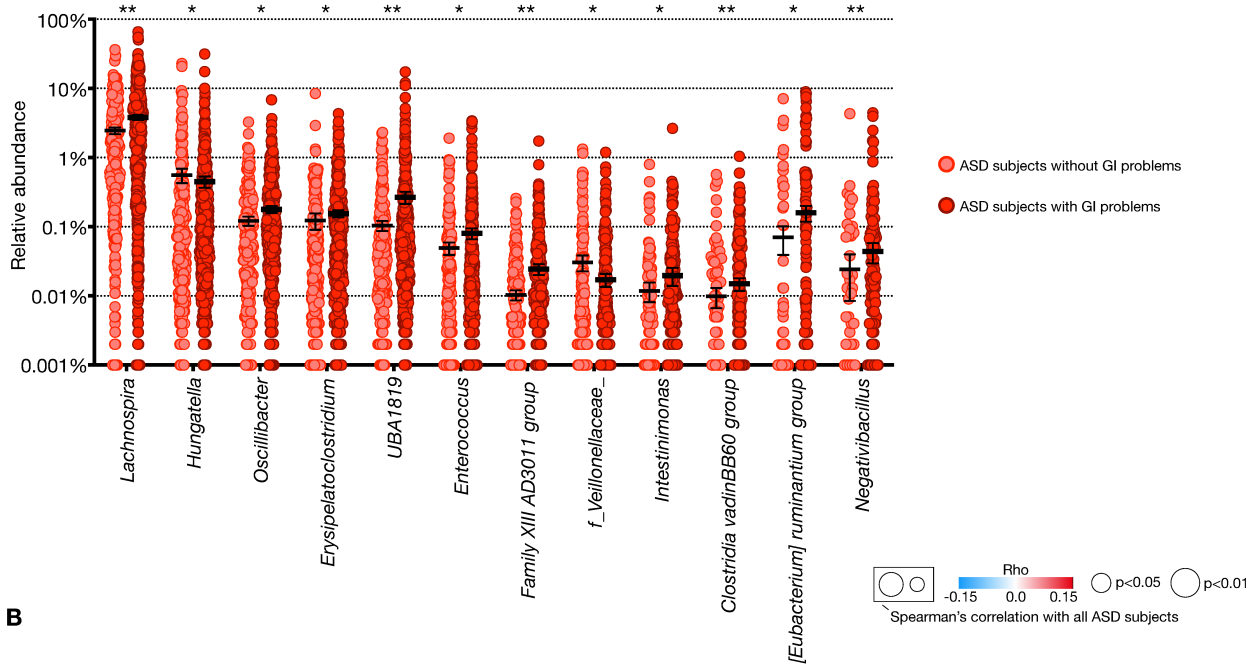

**B**

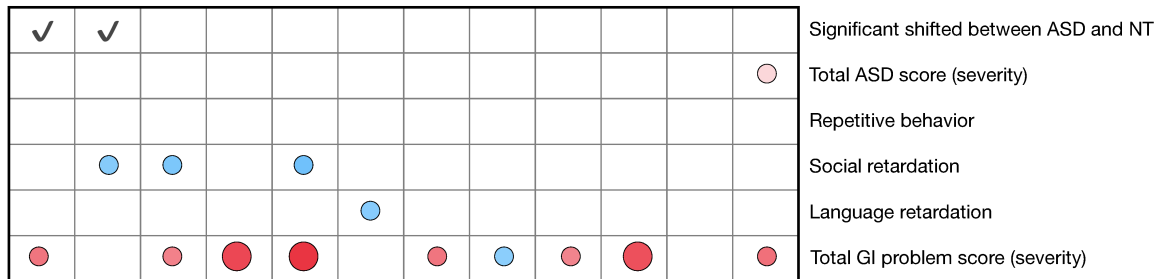

FigureS2

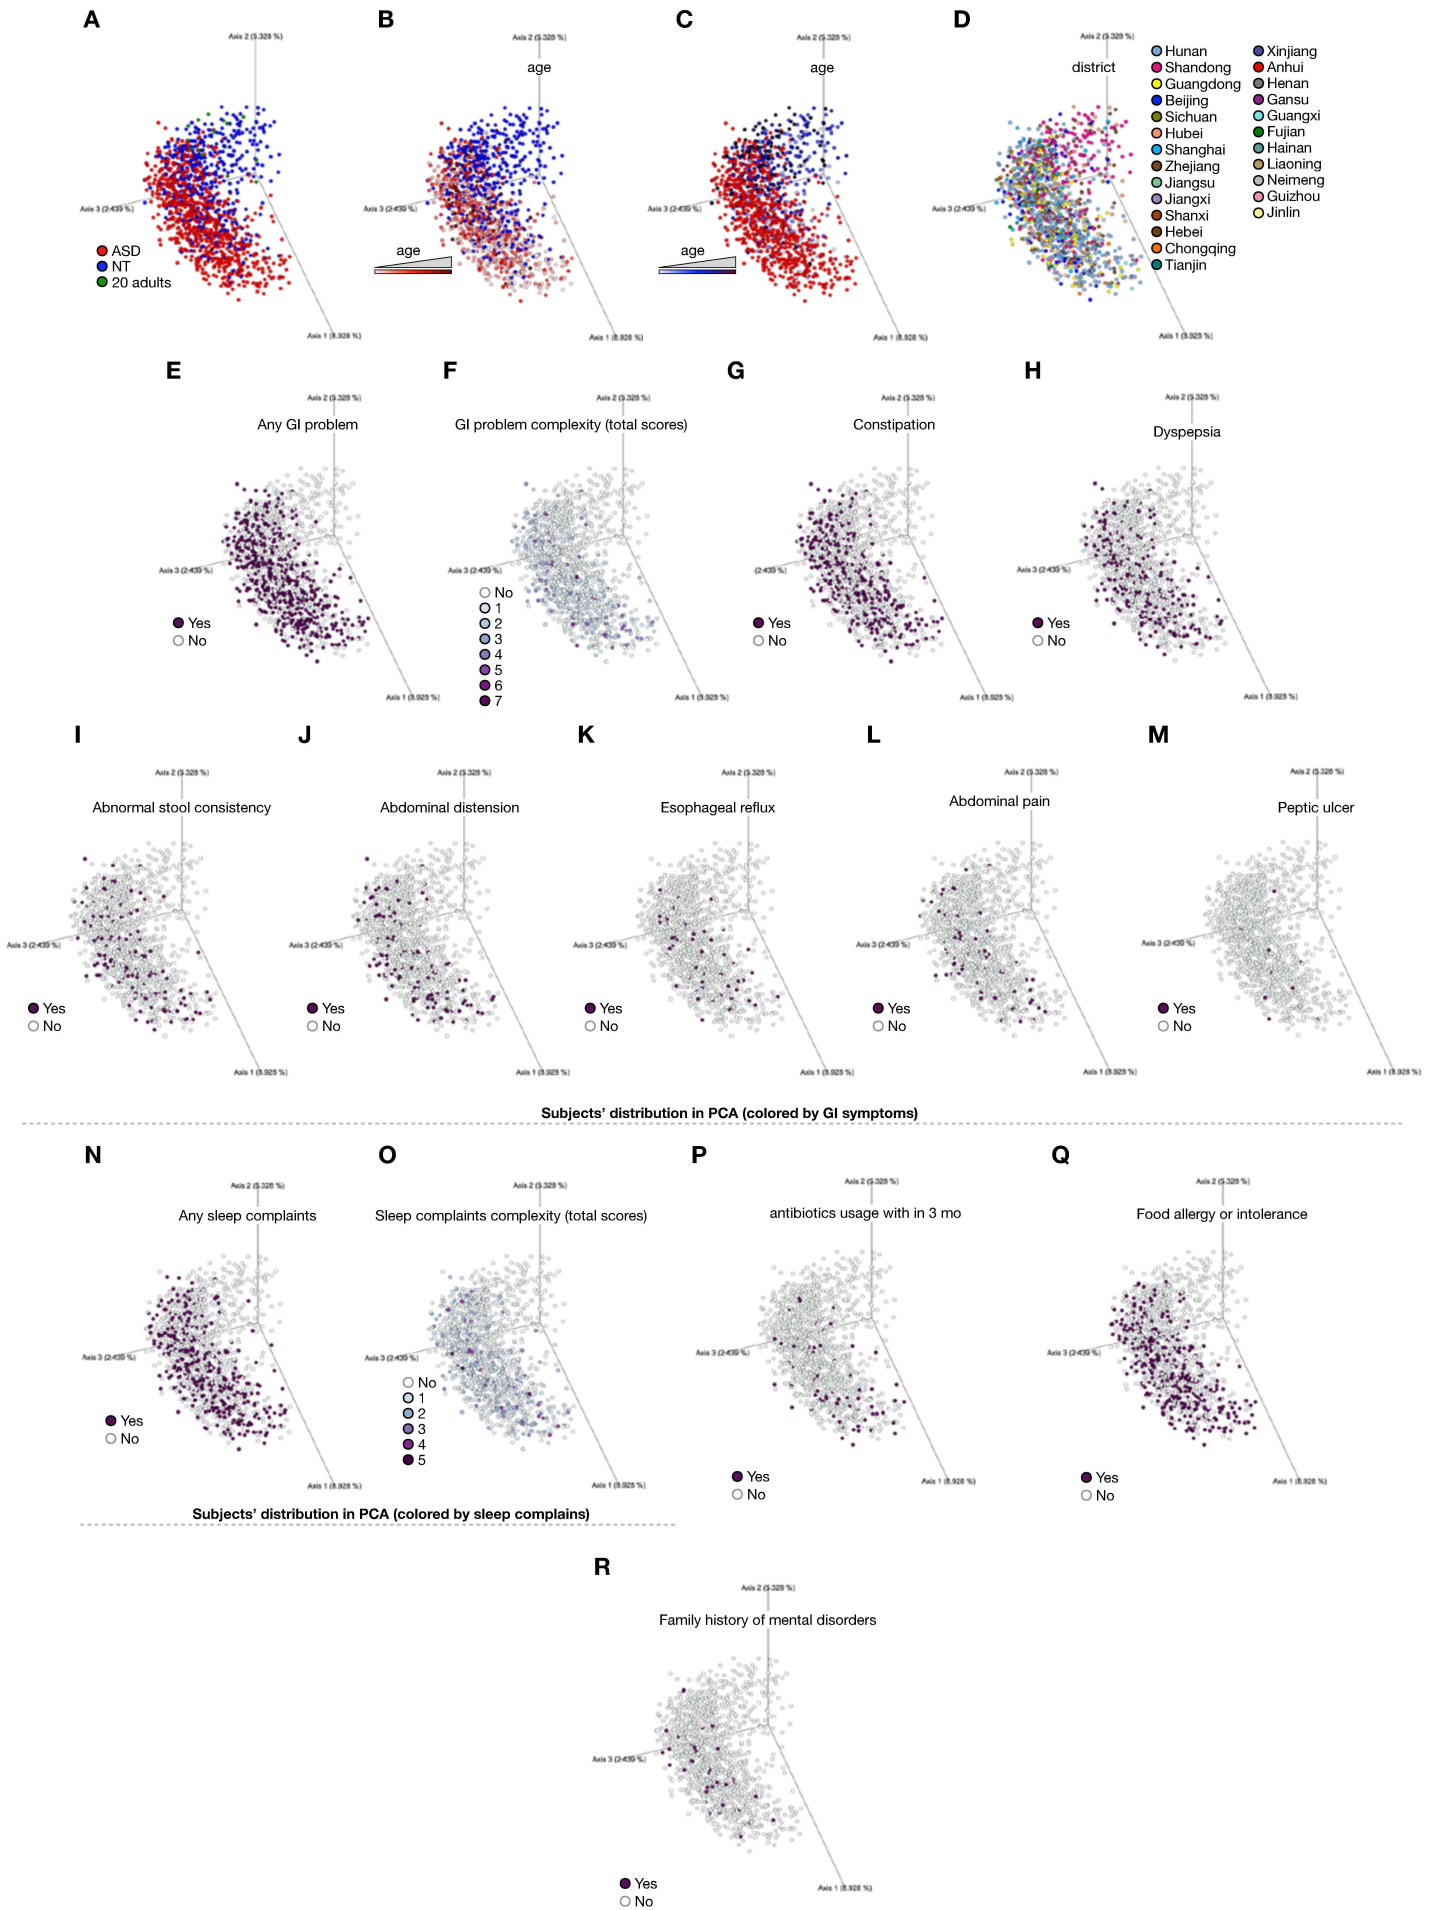

## FigureS3

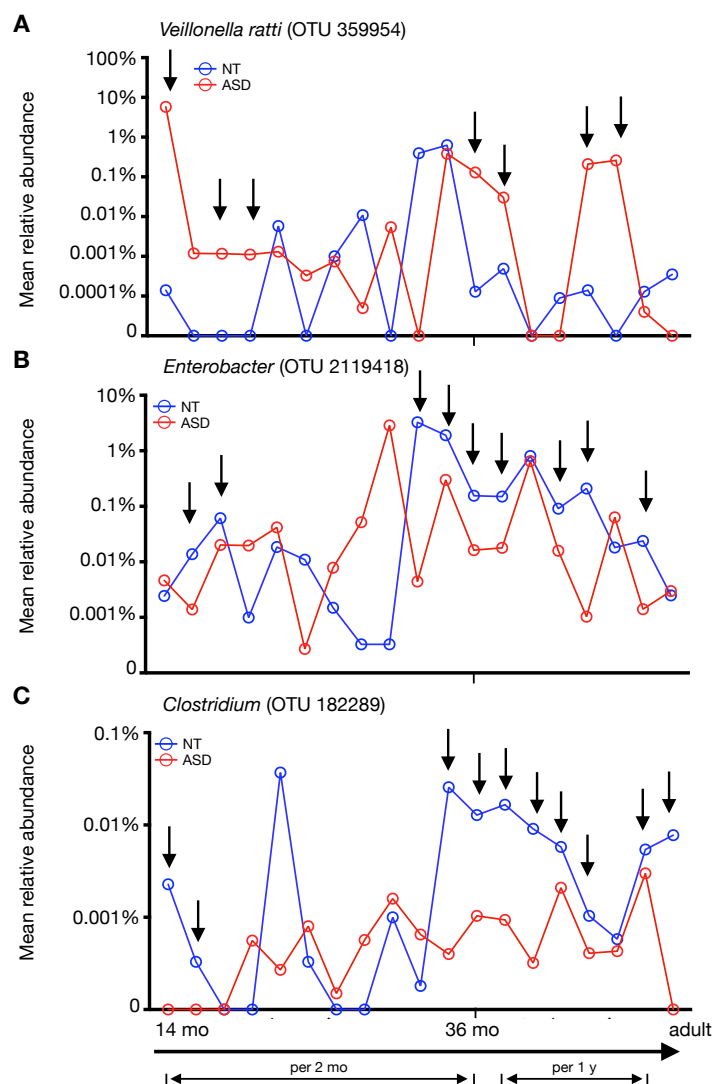

# FigureS4

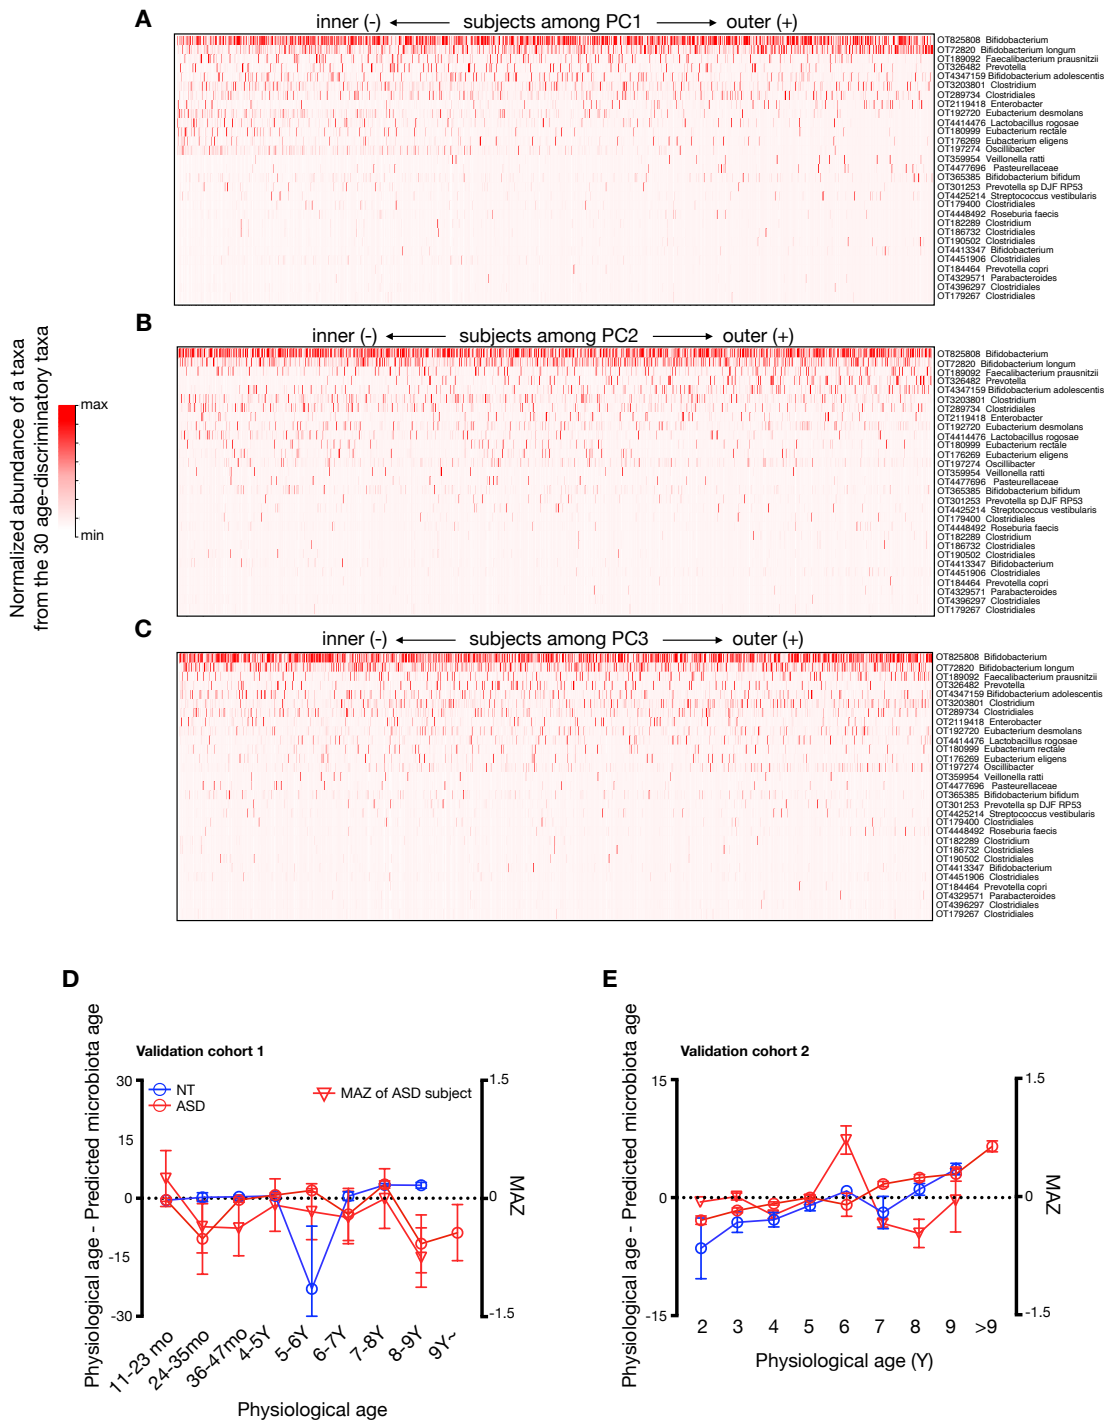

## FigureS5

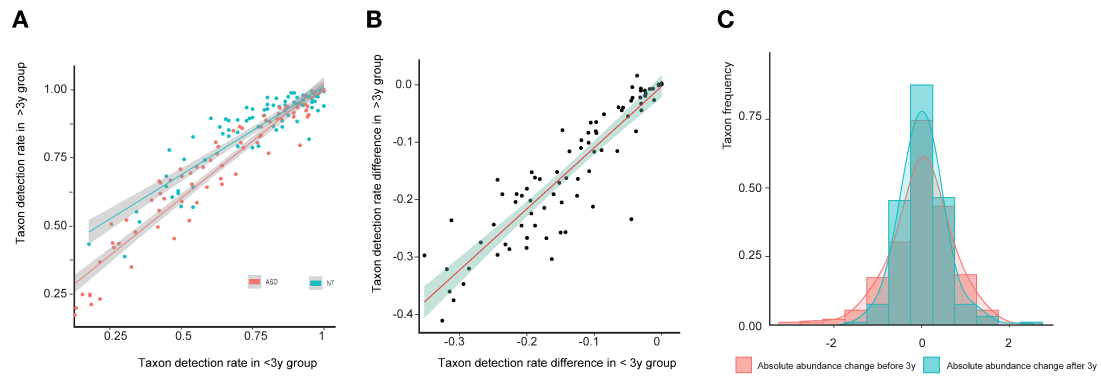

FigureS6

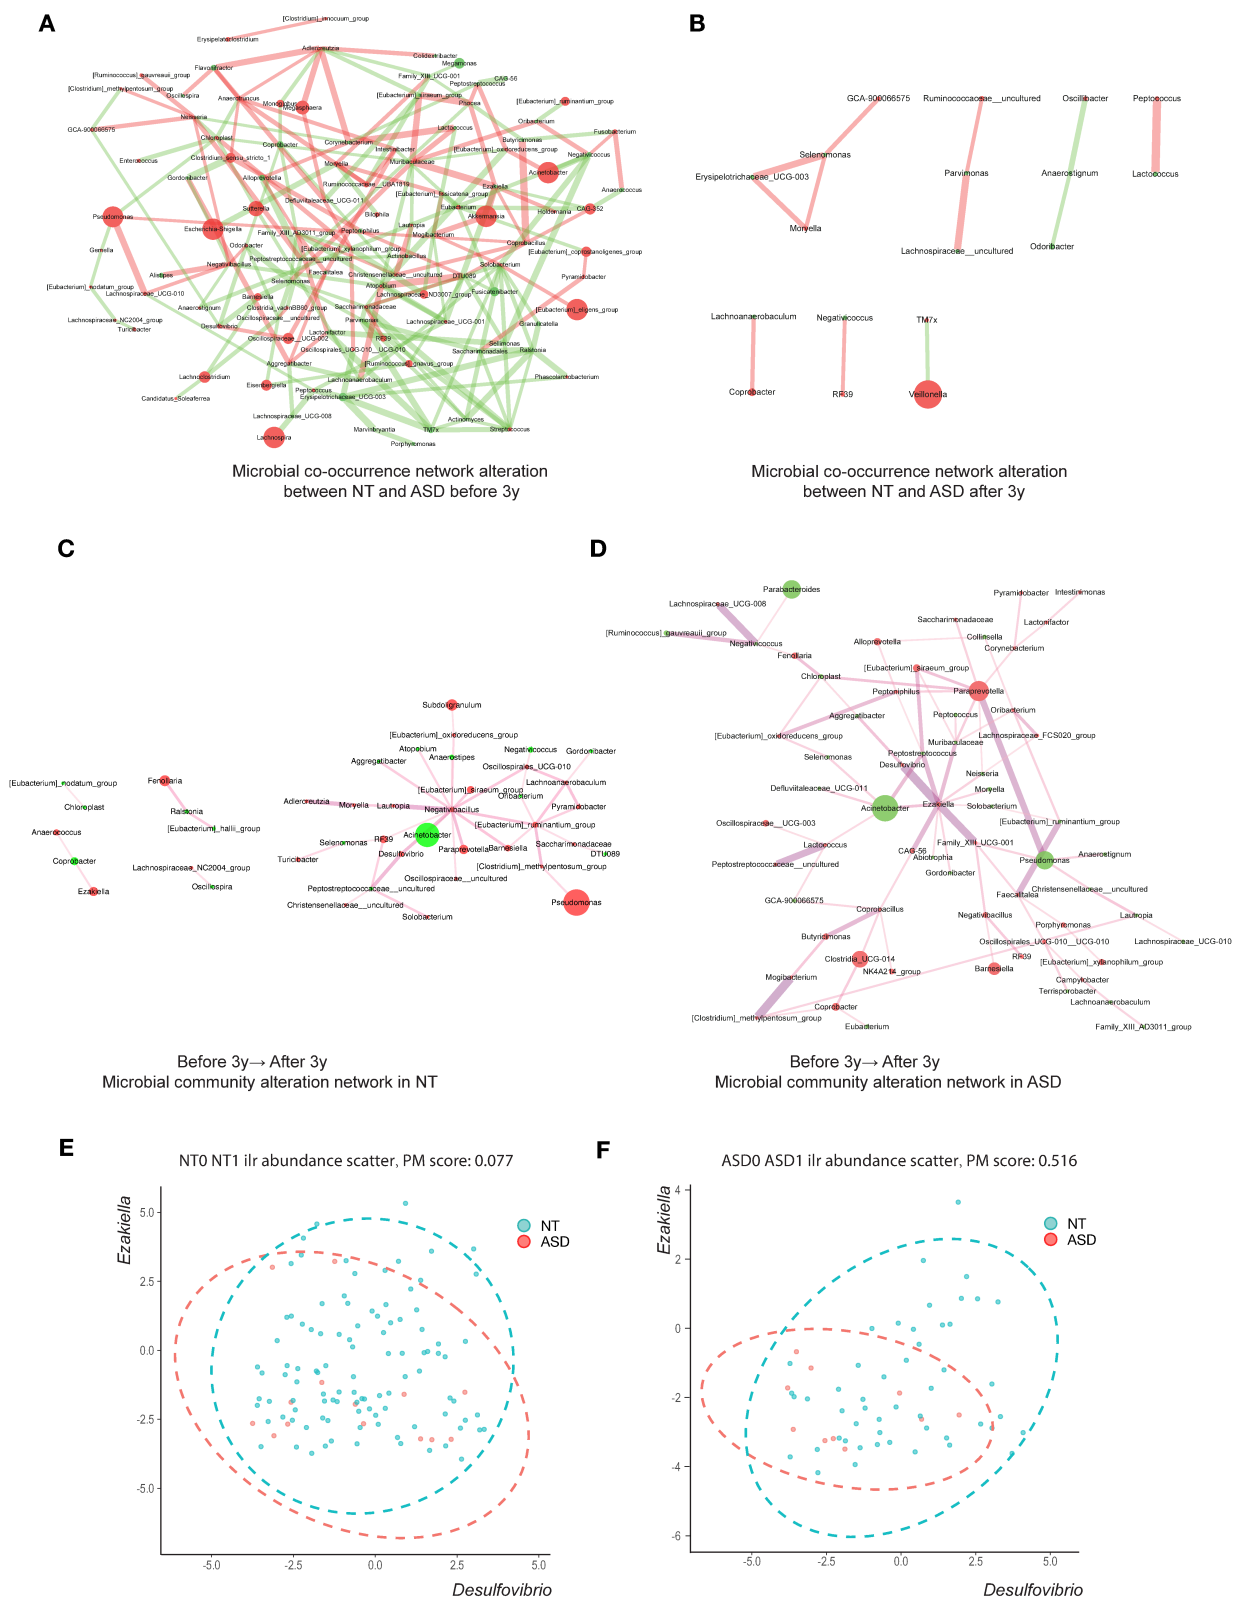

# FigureS7

**A**

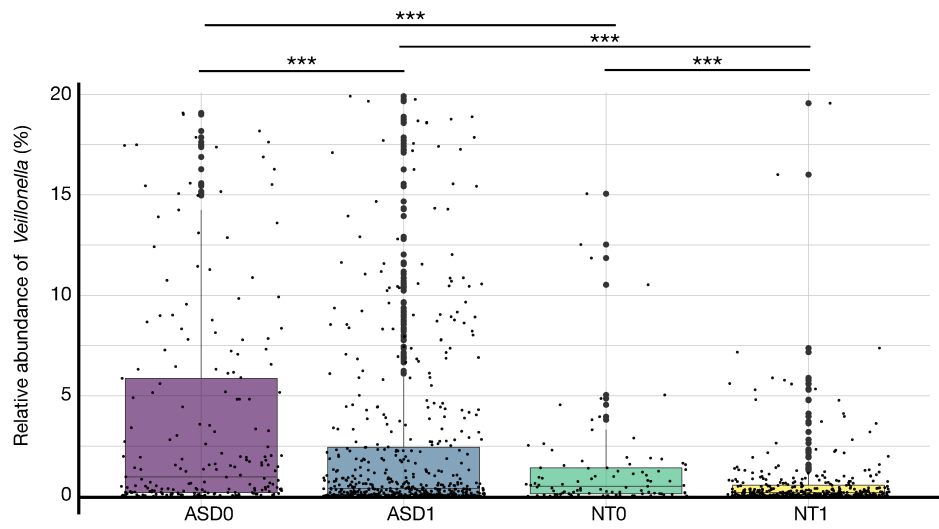

**B**

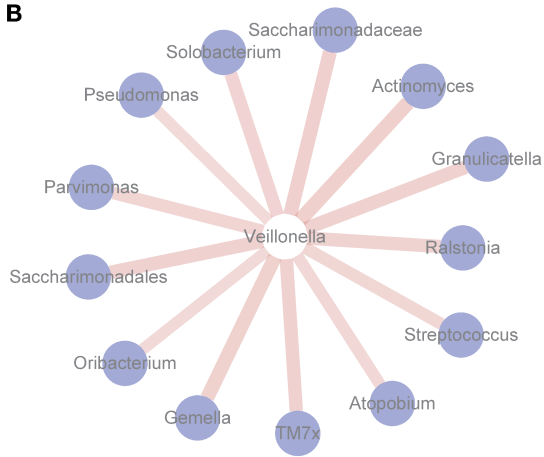

**C**

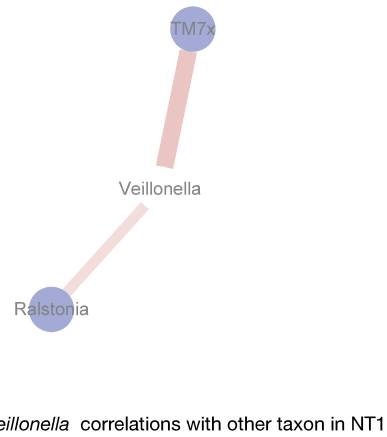

**D**

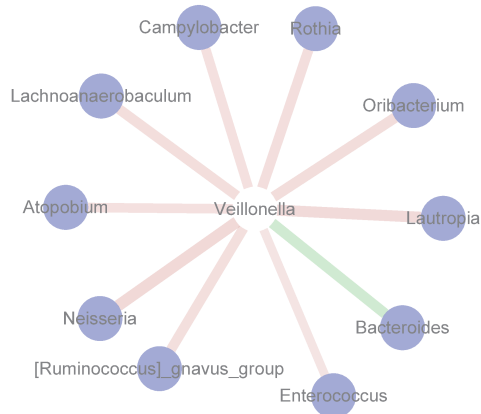

**E**

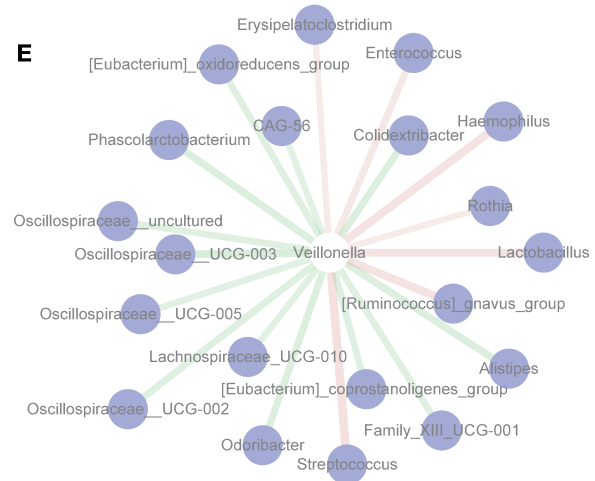





## FigureS9

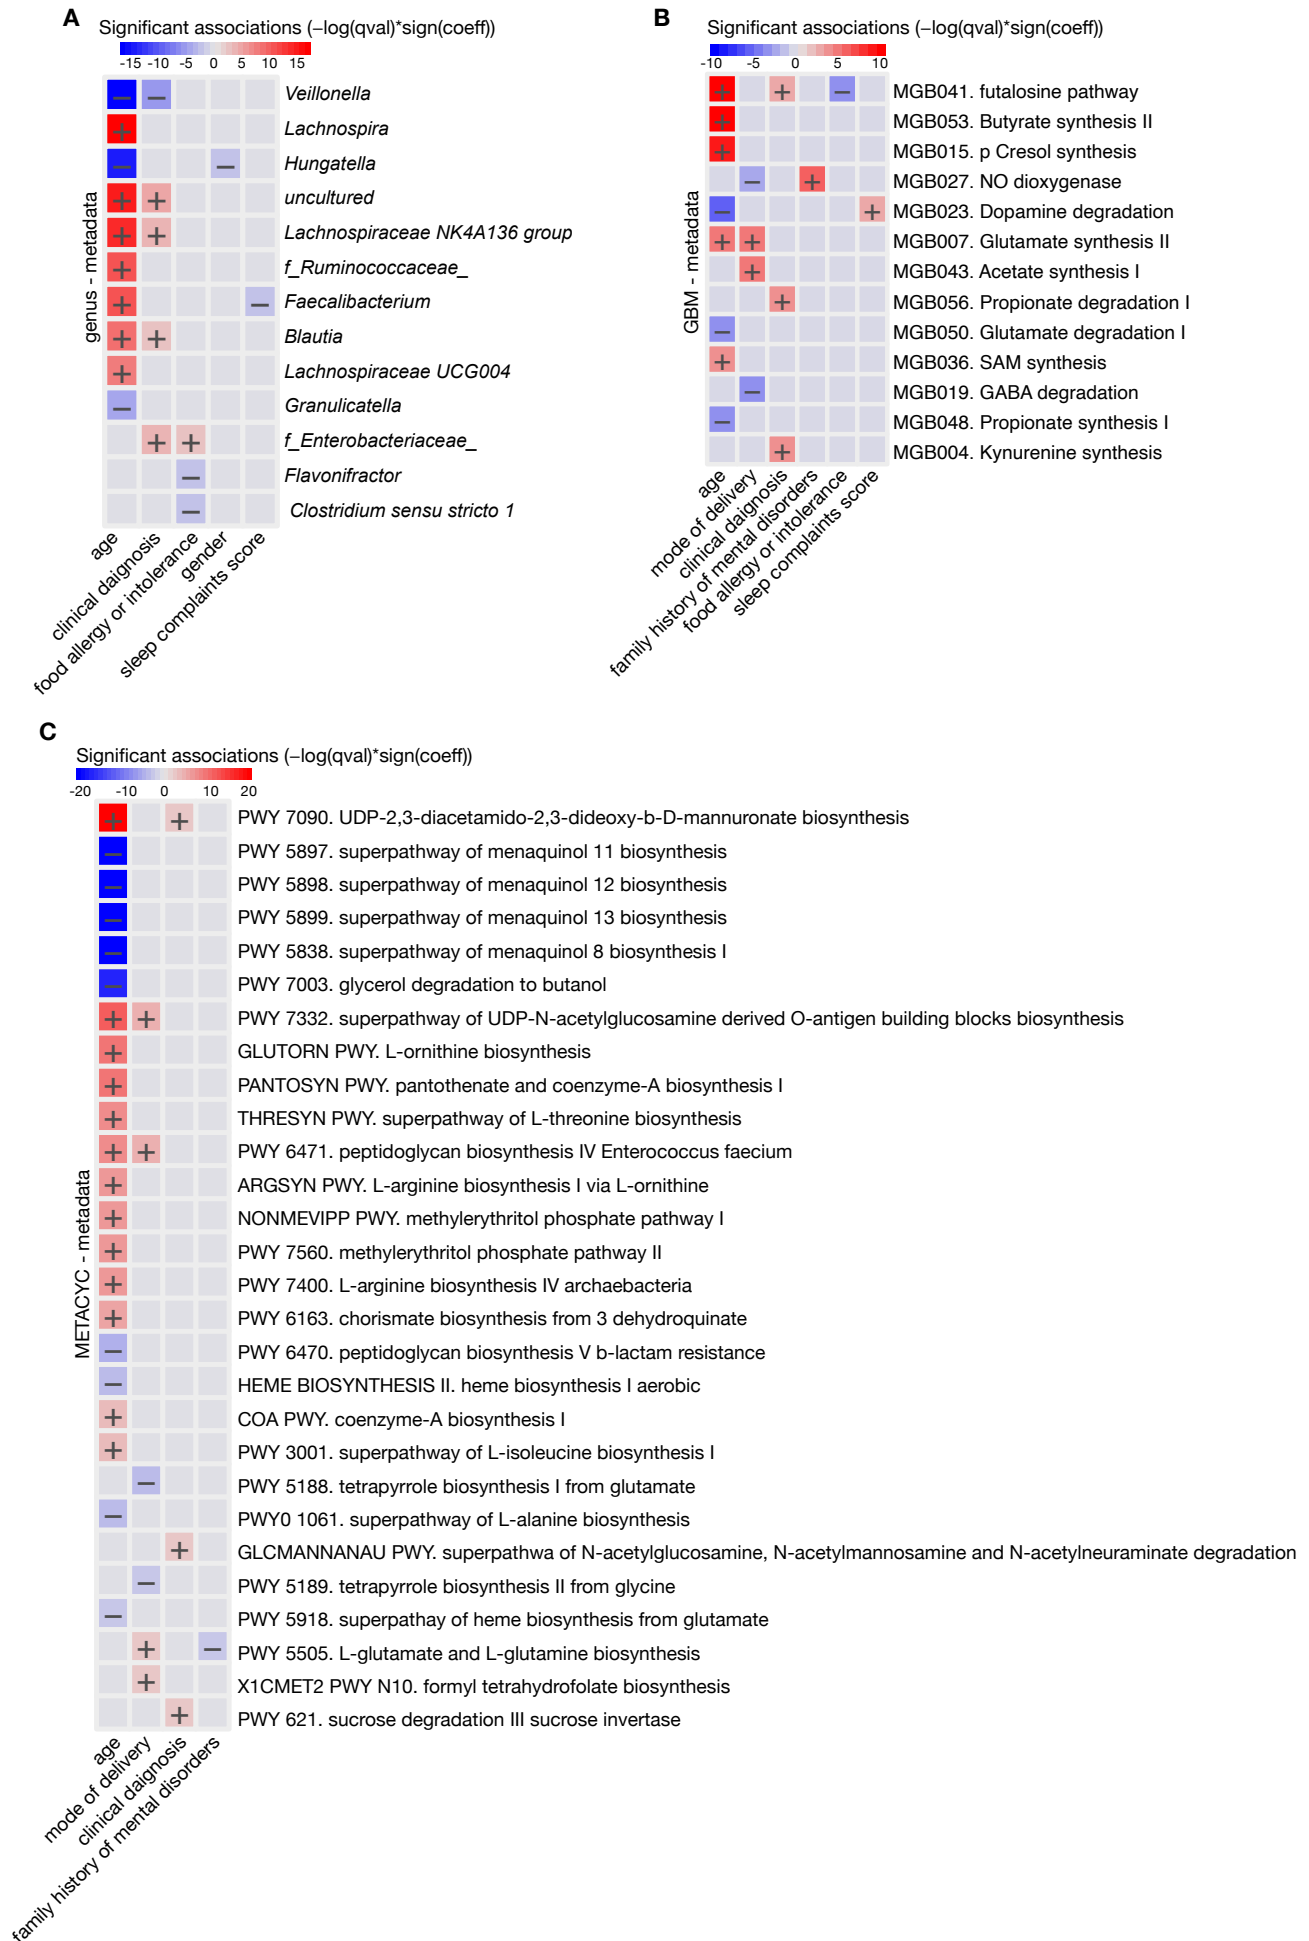

# FigureS10

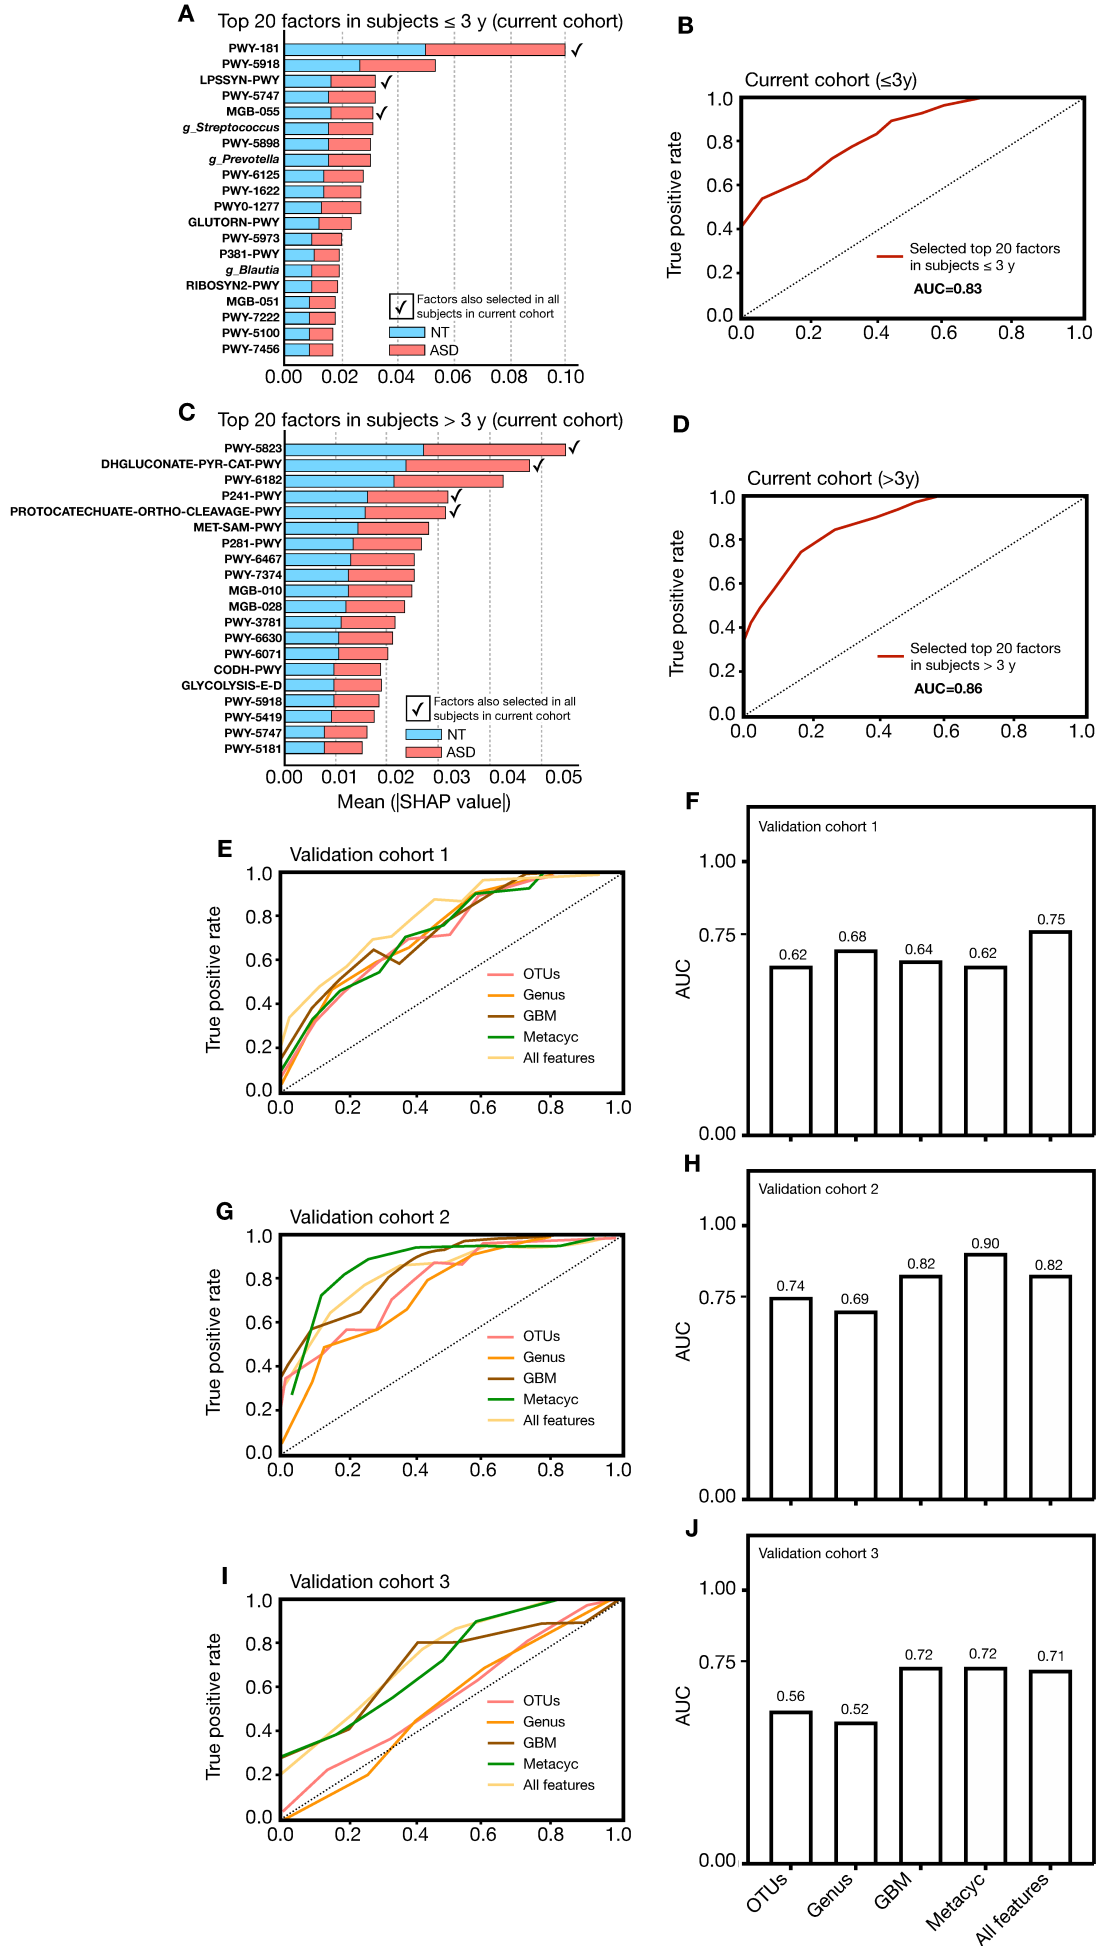

# FigureS11

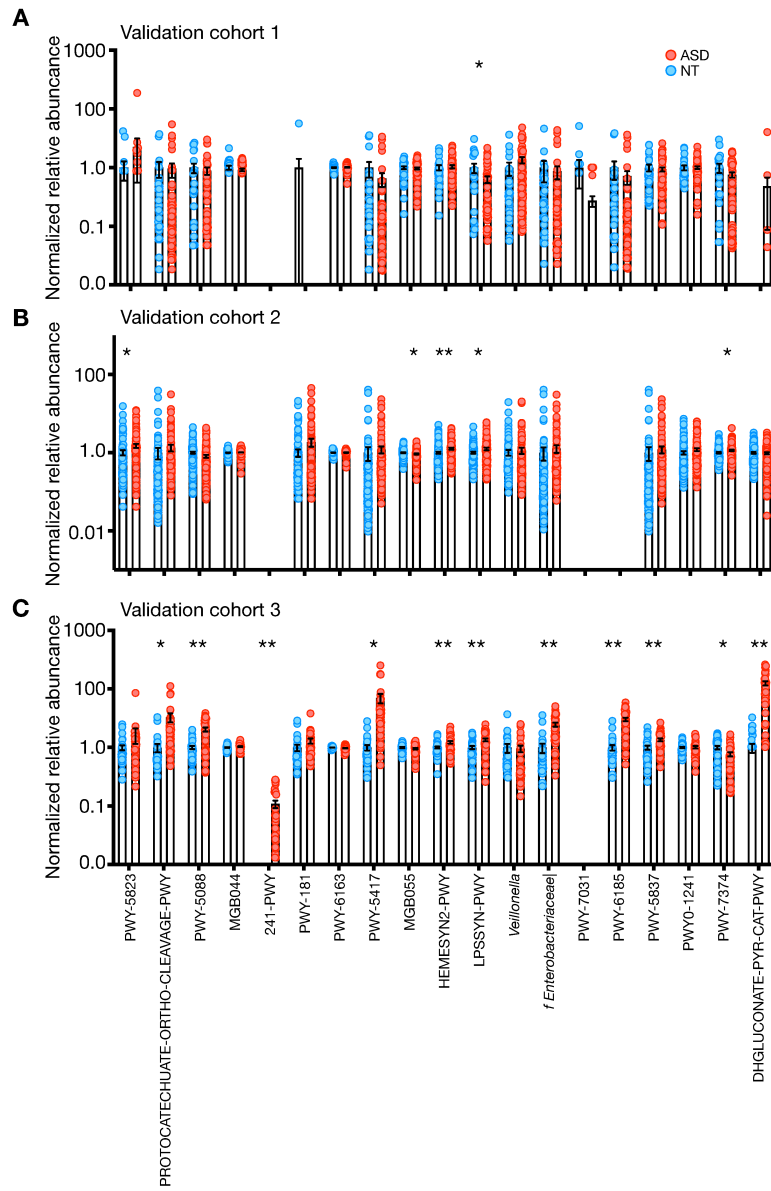

Supplement: gutjnl-2021-325115supp001_data_supplement.pdf [file gutjnl-2021-325115supp001_data_supplement.pdf]
