# Supplementary material for: Deviated and early unsustainable stunted development of gut microbiota in children with autism spectrum disorder
Source: HighWire-hosted journal article supplement (doi:10.1136/gutjnl-2021-325115), 2021-12-20
Supplement: gutjnl-2021-325115supp002_data_supplement.pdf [file gutjnl-2021-325115supp002_data_supplement.pdf]

| Accession | Gene | Chromosome | Start | End | Strand | Gene ID | Gene structure |        |        |        |        |        |        |        |        |         | Transcript structure |         |         |         |         |         |         |         |         |         | Other features |         |         |         |         |         |         |         |         |         |         |         |         |         |         |         |         |         |         |         |         |         |         |         |         |         |         |         |         |         |         |         |         |         |         |         |         |         |         |         |         |         |         |         |         |         |         |         |         |         |         |         |         |         |         |         |         |         |         |         |         |         |         |         |         |         |         |         |         |         |         |         |         |         |         |         |         |         |         |          |          |          |          |          |          |          |          |          |          |          |          |          |          |          |          |          |          |          |          |          |          |          |          |          |          |          |          |          |          |          |          |          |          |          |          |          |          |          |          |          |          |          |          |          |          |          |          |          |          |          |          |          |          |          |          |          |          |          |          |          |          |          |          |          |          |          |          |          |          |          |          |          |          |          |          |          |          |          |          |          |          |          |          |          |          |          |          |          |          |          |          |          |          |          |          |          |          |          |          |          |          |          |          |          |          |          |          |          |          |          |          |          |          |          |          |          |          |          |          |          |          |          |          |          |          |          |          |          |          |          |          |          |          |          |          |          |          |          |          |          |          |          |          |          |          |          |          |          |          |          |          |          |          |          |          |          |          |          |          |          |          |          |          |          |          |          |          |          |          |          |          |          |          |          |          |          |          |          |          |          |          |          |          |          |          |          |          |          |          |          |          |          |          |
|-----------|------|------------|-------|-----|--------|---------|----------------|--------|--------|--------|--------|--------|--------|--------|--------|---------|----------------------|---------|---------|---------|---------|---------|---------|---------|---------|---------|----------------|---------|---------|---------|---------|---------|---------|---------|---------|---------|---------|---------|---------|---------|---------|---------|---------|---------|---------|---------|---------|---------|---------|---------|---------|---------|---------|---------|---------|---------|---------|---------|---------|---------|---------|---------|---------|---------|---------|---------|---------|---------|---------|---------|---------|---------|---------|---------|---------|---------|---------|---------|---------|---------|---------|---------|---------|---------|---------|---------|---------|---------|---------|---------|---------|---------|---------|---------|---------|---------|---------|---------|---------|---------|---------|---------|---------|---------|---------|----------|----------|----------|----------|----------|----------|----------|----------|----------|----------|----------|----------|----------|----------|----------|----------|----------|----------|----------|----------|----------|----------|----------|----------|----------|----------|----------|----------|----------|----------|----------|----------|----------|----------|----------|----------|----------|----------|----------|----------|----------|----------|----------|----------|----------|----------|----------|----------|----------|----------|----------|----------|----------|----------|----------|----------|----------|----------|----------|----------|----------|----------|----------|----------|----------|----------|----------|----------|----------|----------|----------|----------|----------|----------|----------|----------|----------|----------|----------|----------|----------|----------|----------|----------|----------|----------|----------|----------|----------|----------|----------|----------|----------|----------|----------|----------|----------|----------|----------|----------|----------|----------|----------|----------|----------|----------|----------|----------|----------|----------|----------|----------|----------|----------|----------|----------|----------|----------|----------|----------|----------|----------|----------|----------|----------|----------|----------|----------|----------|----------|----------|----------|----------|----------|----------|----------|----------|----------|----------|----------|----------|----------|----------|----------|----------|----------|----------|----------|----------|----------|----------|----------|----------|----------|----------|----------|----------|----------|----------|----------|----------|----------|----------|----------|----------|----------|----------|----------|----------|----------|----------|----------|----------|----------|----------|----------|----------|----------|----------|----------|----------|----------|----------|----------|----------|----------|----------|----------|----------|----------|----------|----------|----------|----------|
|           |      |            |       |     |        |         | Exon 1         | Exon 2 | Exon 3 | Exon 4 | Exon 5 | Exon 6 | Exon 7 | Exon 8 | Exon 9 | Exon 10 | Exon 11              | Exon 12 | Exon 13 | Exon 14 | Exon 15 | Exon 16 | Exon 17 | Exon 18 | Exon 19 | Exon 20 | Exon 21        | Exon 22 | Exon 23 | Exon 24 | Exon 25 | Exon 26 | Exon 27 | Exon 28 | Exon 29 | Exon 30 | Exon 31 | Exon 32 | Exon 33 | Exon 34 | Exon 35 | Exon 36 | Exon 37 | Exon 38 | Exon 39 | Exon 40 | Exon 41 | Exon 42 | Exon 43 | Exon 44 | Exon 45 | Exon 46 | Exon 47 | Exon 48 | Exon 49 | Exon 50 | Exon 51 | Exon 52 | Exon 53 | Exon 54 | Exon 55 | Exon 56 | Exon 57 | Exon 58 | Exon 59 | Exon 60 | Exon 61 | Exon 62 | Exon 63 | Exon 64 | Exon 65 | Exon 66 | Exon 67 | Exon 68 | Exon 69 | Exon 70 | Exon 71 | Exon 72 | Exon 73 | Exon 74 | Exon 75 | Exon 76 | Exon 77 | Exon 78 | Exon 79 | Exon 80 | Exon 81 | Exon 82 | Exon 83 | Exon 84 | Exon 85 | Exon 86 | Exon 87 | Exon 88 | Exon 89 | Exon 90 | Exon 91 | Exon 92 | Exon 93 | Exon 94 | Exon 95 | Exon 96 | Exon 97 | Exon 98 | Exon 99 | Exon 100 | Exon 101 | Exon 102 | Exon 103 | Exon 104 | Exon 105 | Exon 106 | Exon 107 | Exon 108 | Exon 109 | Exon 110 | Exon 111 | Exon 112 | Exon 113 | Exon 114 | Exon 115 | Exon 116 | Exon 117 | Exon 118 | Exon 119 | Exon 120 | Exon 121 | Exon 122 | Exon 123 | Exon 124 | Exon 125 | Exon 126 | Exon 127 | Exon 128 | Exon 129 | Exon 130 | Exon 131 | Exon 132 | Exon 133 | Exon 134 | Exon 135 | Exon 136 | Exon 137 | Exon 138 | Exon 139 | Exon 140 | Exon 141 | Exon 142 | Exon 143 | Exon 144 | Exon 145 | Exon 146 | Exon 147 | Exon 148 | Exon 149 | Exon 150 | Exon 151 | Exon 152 | Exon 153 | Exon 154 | Exon 155 | Exon 156 | Exon 157 | Exon 158 | Exon 159 | Exon 160 | Exon 161 | Exon 162 | Exon 163 | Exon 164 | Exon 165 | Exon 166 | Exon 167 | Exon 168 | Exon 169 | Exon 170 | Exon 171 | Exon 172 | Exon 173 | Exon 174 | Exon 175 | Exon 176 | Exon 177 | Exon 178 | Exon 179 | Exon 180 | Exon 181 | Exon 182 | Exon 183 | Exon 184 | Exon 185 | Exon 186 | Exon 187 | Exon 188 | Exon 189 | Exon 190 | Exon 191 | Exon 192 | Exon 193 | Exon 194 | Exon 195 | Exon 196 | Exon 197 | Exon 198 | Exon 199 | Exon 200 | Exon 201 | Exon 202 | Exon 203 | Exon 204 | Exon 205 | Exon 206 | Exon 207 | Exon 208 | Exon 209 | Exon 210 | Exon 211 | Exon 212 | Exon 213 | Exon 214 | Exon 215 | Exon 216 | Exon 217 | Exon 218 | Exon 219 | Exon 220 | Exon 221 | Exon 222 | Exon 223 | Exon 224 | Exon 225 | Exon 226 | Exon 227 | Exon 228 | Exon 229 | Exon 230 | Exon 231 | Exon 232 | Exon 233 | Exon 234 | Exon 235 | Exon 236 | Exon 237 | Exon 238 | Exon 239 | Exon 240 | Exon 241 | Exon 242 | Exon 243 | Exon 244 | Exon 245 | Exon 246 | Exon 247 | Exon 248 | Exon 249 | Exon 250 | Exon 251 | Exon 252 | Exon 253 | Exon 254 | Exon 255 | Exon 256 | Exon 257 | Exon 258 | Exon 259 | Exon 260 | Exon 261 | Exon 262 | Exon 263 | Exon 264 | Exon 265 | Exon 266 | Exon 267 | Exon 268 | Exon 269 | Exon 270 | Exon 271 | Exon 272 | Exon 273 | Exon 274 | Exon 275 | Exon 276 | Exon 277 | Exon 278 | Exon 279 | Exon 280 | Exon 281 | Exon 282 | Exon 283 | Exon 284 | Exon 285 | Exon 286 | Exon 287 | Exon 288 | Exon 289 | Exon 290 | Exon 291 | Exon 292 | Exon 293 |





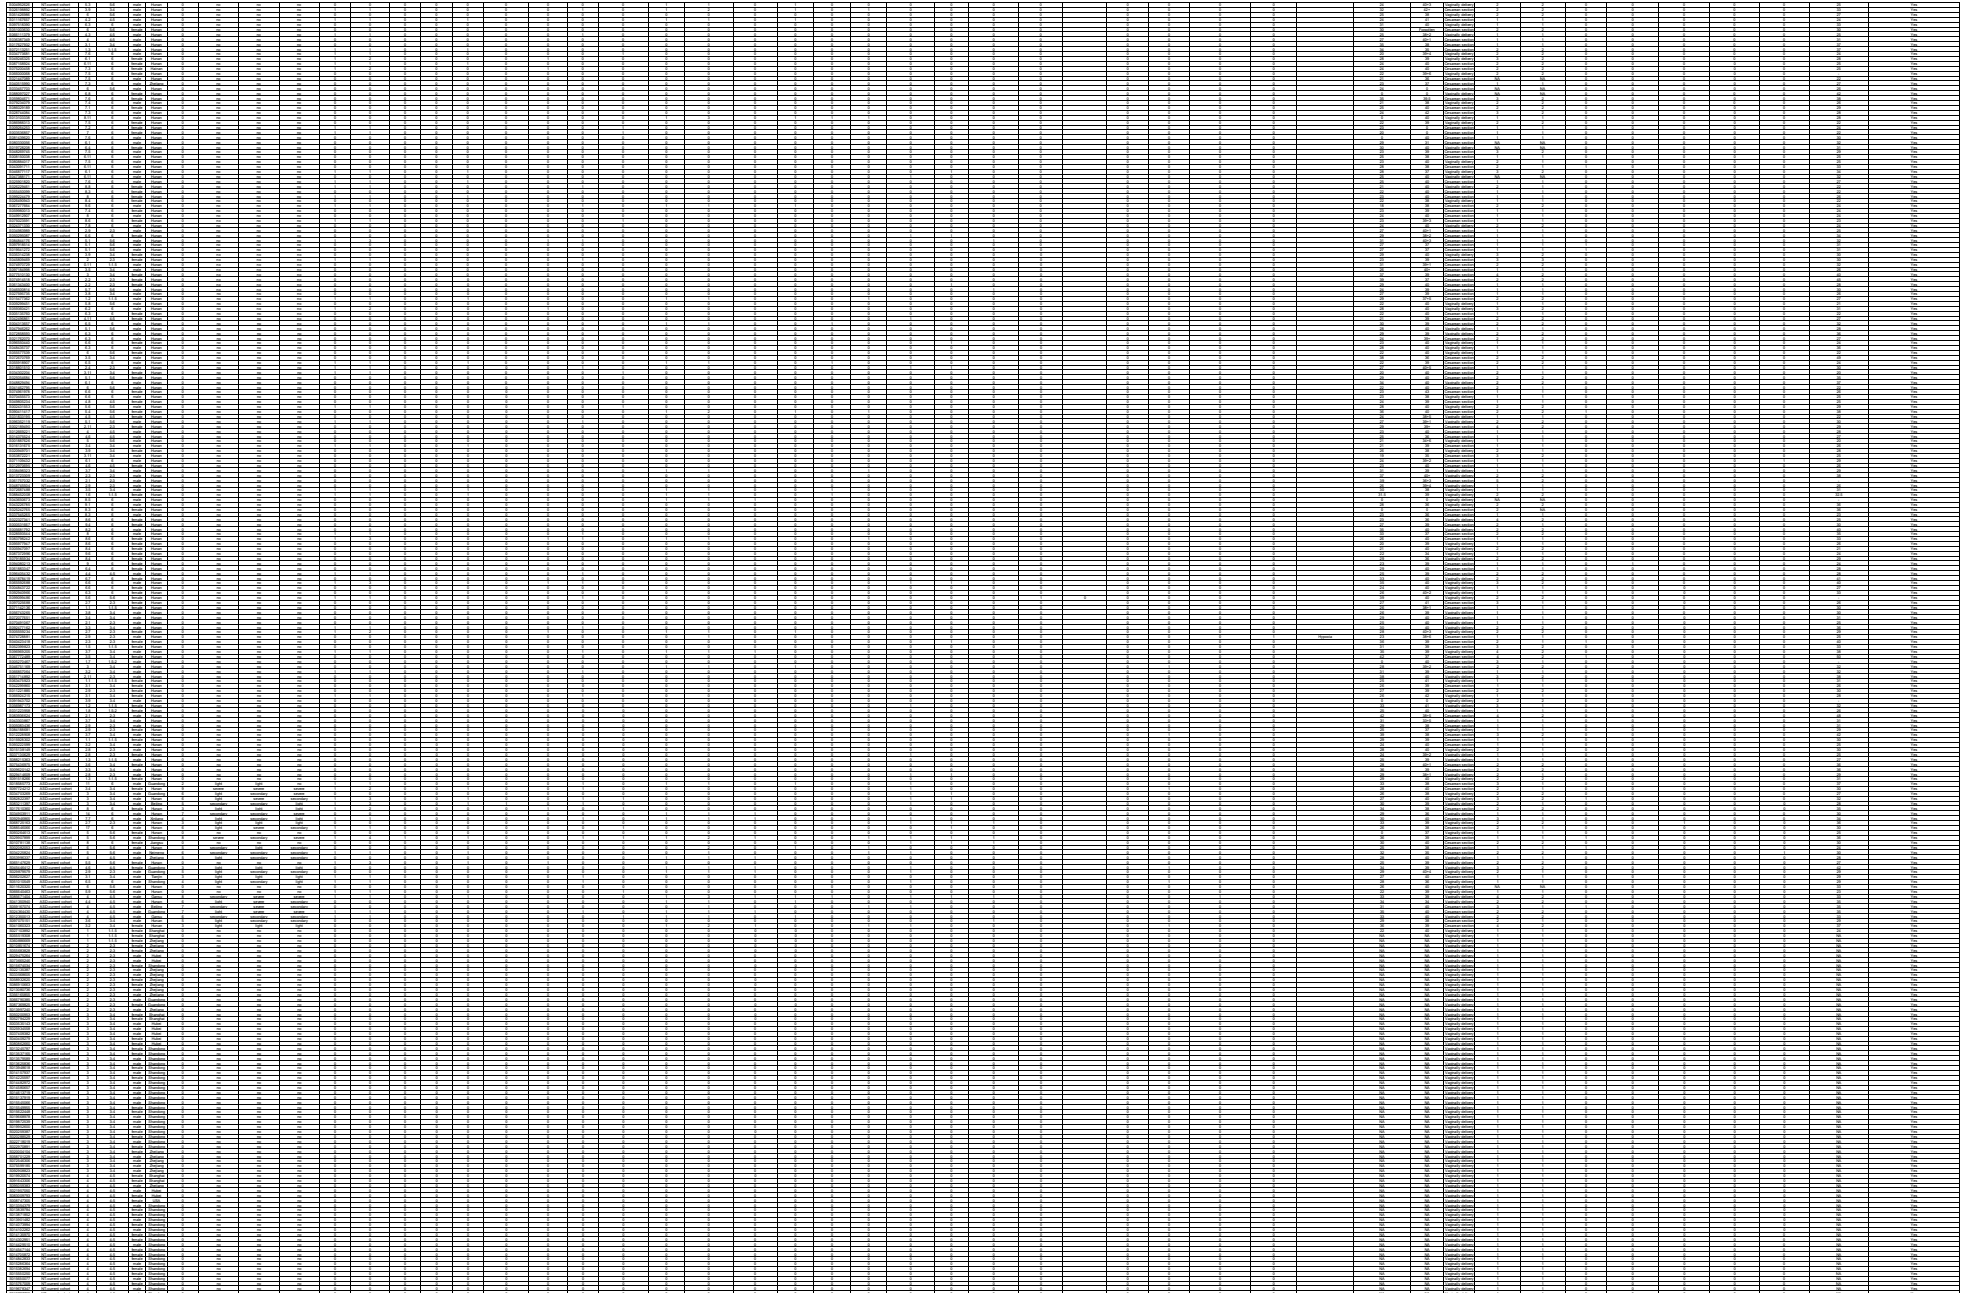

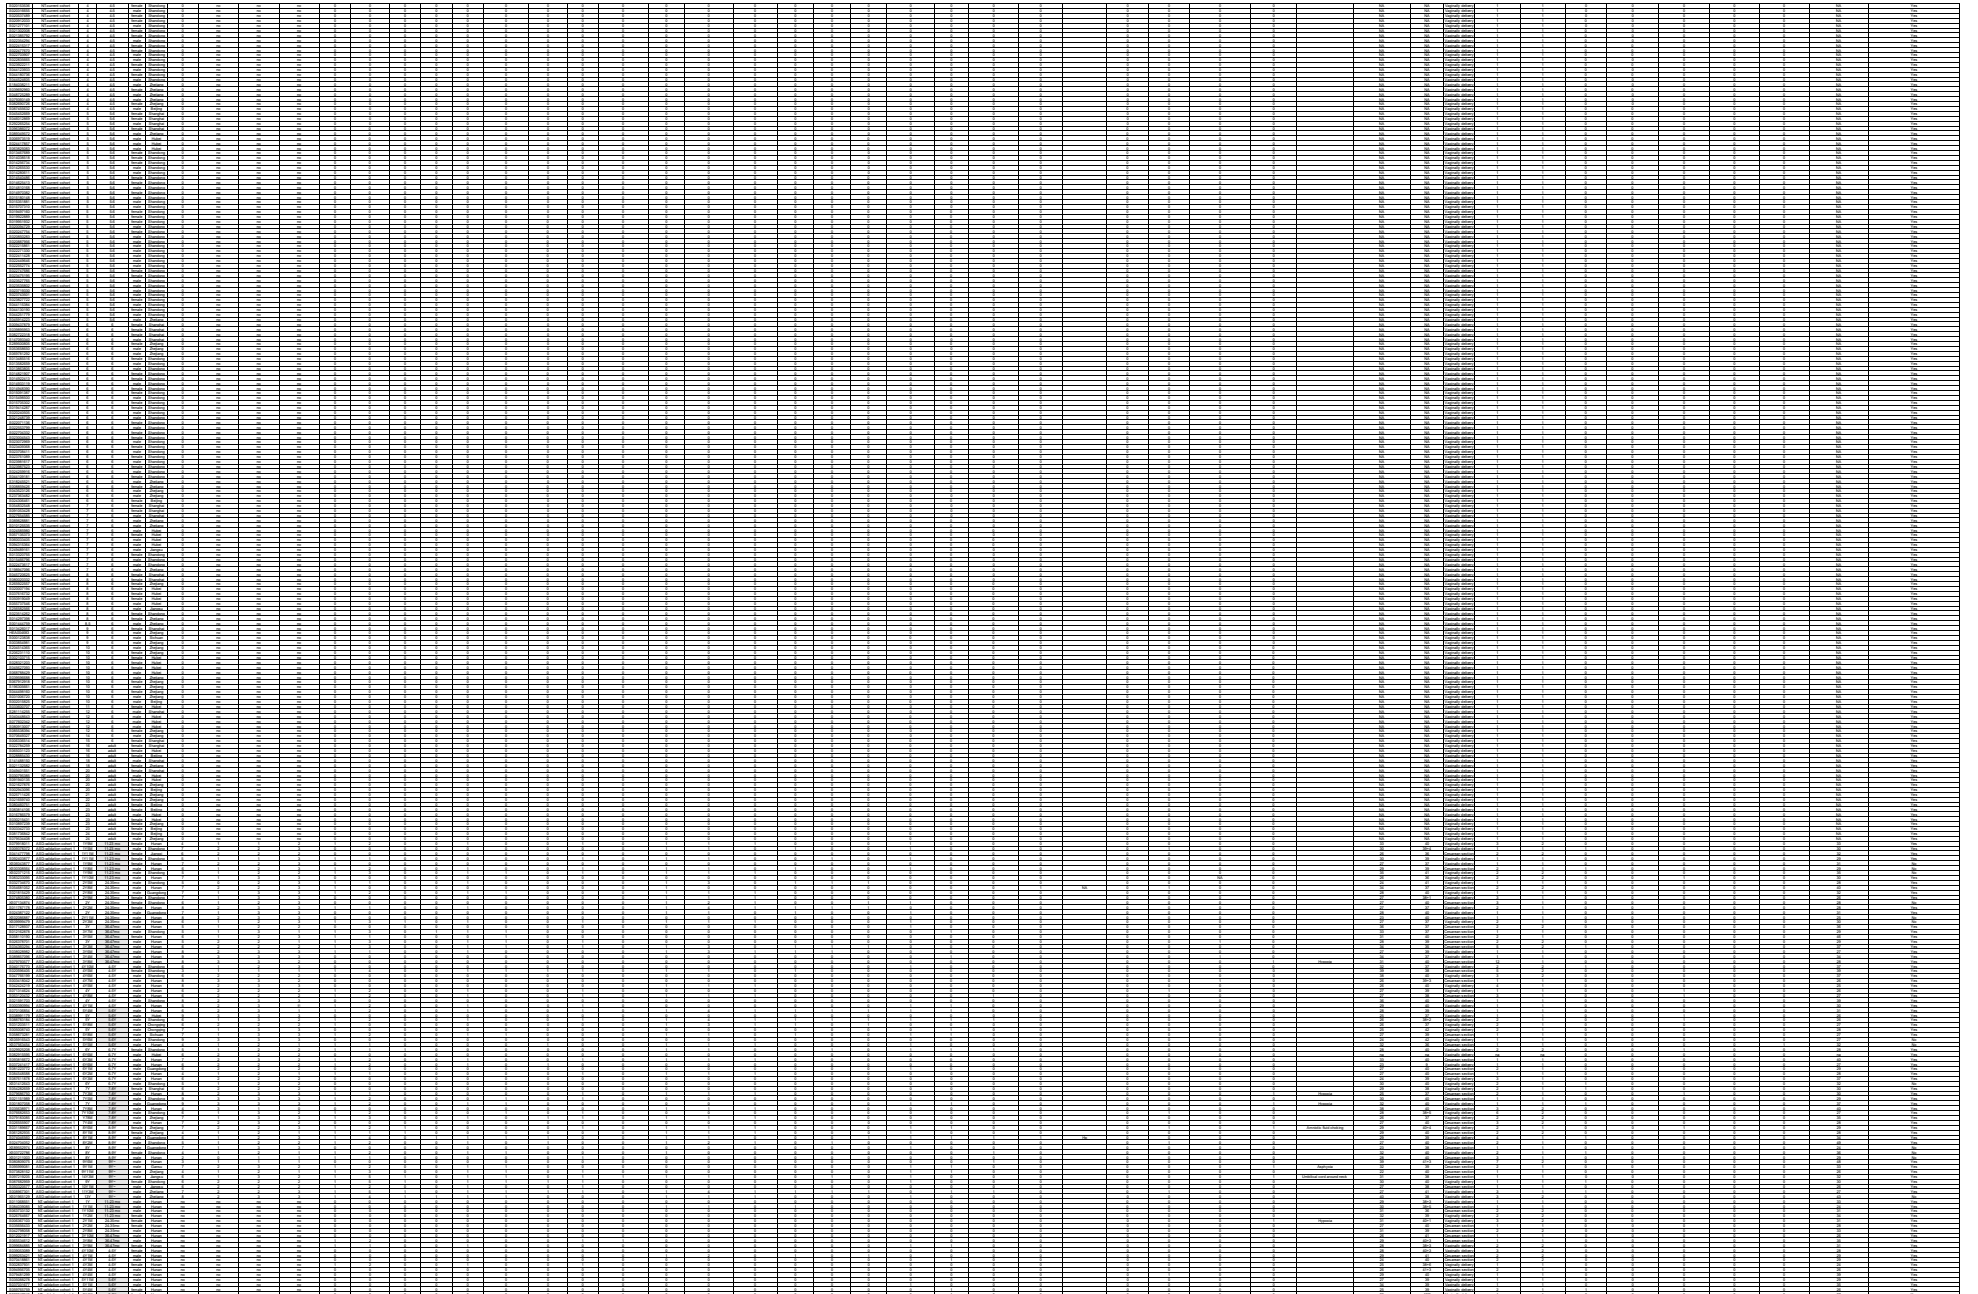

The image shows a large, empty grid table with many columns and rows. The grid is composed of small, uniform squares, suggesting a data table or a complex table with many columns and rows. The grid is mostly empty, with some faint, illegible text visible in the lower right quadrant, possibly representing a table header or footer that is too small to read. The overall appearance is that of a placeholder or a very large, empty table.



| <b>Table 2 Summary of subject's distributions according to age categories</b> |                         |            |           |
|-------------------------------------------------------------------------------|-------------------------|------------|-----------|
| Current cohort                                                                | <b>age brackets (y)</b> | <b>ASD</b> | <b>NT</b> |
|                                                                               | 1-1.5                   | 11         | 16        |
|                                                                               | 1.5-2                   | 14         | 3         |
|                                                                               | 2-3                     | 128        | 40        |
|                                                                               | 3-4                     | 179        | 70        |
|                                                                               | 4-5                     | 134        | 63        |
|                                                                               | 5-6                     | 152        | 75        |
|                                                                               | 6-7Y                    | 34         | 65        |
|                                                                               | 7-8Y                    | 40         | 33        |
|                                                                               | 8-9Y                    | 29         | 29        |
|                                                                               | 9-12Y                   | 39         | 28        |
|                                                                               | 12-15Y                  | 9          | 8         |
|                                                                               | adult                   | 3          | 20        |
|                                                                               | total                   | 772        | 450       |
| Validation cohort 1                                                           | <b>age brackets</b>     | <b>ASD</b> | <b>NT</b> |
|                                                                               | 11-23 mo                | 8          | 4         |
|                                                                               | 24-35mo                 | 9          | 3         |
|                                                                               | 36-47mo                 | 8          | 3         |
|                                                                               | 4-5Y                    | 9          | 6         |
|                                                                               | 5-6Y                    | 8          | 5         |
|                                                                               | 6-7Y                    | 8          | 4         |
|                                                                               | 7-8Y                    | 8          | 3         |
|                                                                               | 8-9Y                    | 7          | 4         |
|                                                                               | 9Y~                     | 8          | none      |
|                                                                               | total                   | 73         | 32        |

**Table 3 Identification of severity levels for autism spectrum disorder based on DSM-IV and DSM-V**

|          | Social communication                                                                                                                                                                                                                                                                                         | Restricted, repetitive behaviors                                                                                                                                                                                                                                                                              | Language development delay                                                               |
|----------|--------------------------------------------------------------------------------------------------------------------------------------------------------------------------------------------------------------------------------------------------------------------------------------------------------------|---------------------------------------------------------------------------------------------------------------------------------------------------------------------------------------------------------------------------------------------------------------------------------------------------------------|------------------------------------------------------------------------------------------|
| Mild     | Requiring support. Without supports in place, deficits in social communication cause noticeable impairments. Difficulty initiating social interactions, and clear examples of atypical or unsuccessful response to social overtures of others. May appear to have decreased interest in social interactions. | Requiring support. Inflexibility of behavior causes significant interference with functioning in one or more contexts. Difficulty switching between activities. Problems of organization and planning hamper independence.                                                                                    | Difficulty in putting words together into a sentence or leaving words out of a sentence. |
| Moderate | Requiring substantial support. Marked deficits in verbal and nonverbal social communication skills; social impairments apparent even with supports in place; limited initiation of social interactions; and reduced or abnormal responses to social overtures from others.                                   | Requiring substantial support. Inflexibility of behavior, difficulty coping with change, or other restricted/repetitive behaviors appear frequently enough to be obvious to the casual observer and interfere with functioning in a variety of contexts. Distress and/or difficulty changing focus or action. | Imitation, just babbling or inability to speak in short sentences.                       |
| Severe   | Requiring very substantial support. Severe deficits in verbal and nonverbal social communication skills cause severe impairments in functioning, very limited initiation of social interactions, and minimal response to social overtures from others.                                                       | Requiring very substantial support. Inflexibility of behavior, extreme difficulty coping with change, or other restricted/repetitive behaviors markedly interfere with functioning in all spheres. Great distress/difficulty changing focus or action.                                                        | Language only for needs or not talking.                                                  |



| Table 4 Summary of <b>subject's distributions</b> according to district categories |               |            |           |
|------------------------------------------------------------------------------------|---------------|------------|-----------|
| <b>Current cohort</b>                                                              | <b>Region</b> | <b>ASD</b> | <b>NT</b> |
|                                                                                    | Hunan         | 285        | 198       |
|                                                                                    | Guandong      | 104        | 2         |
|                                                                                    | Shandong      | 65         | 120       |
|                                                                                    | Beijing       | 56         | 10        |
|                                                                                    | Sichuan       | 36         | 1         |
|                                                                                    | Hubei         | 28         | 33        |
|                                                                                    | Shanghai      | 25         | 25        |
|                                                                                    | Zhejiang      | 24         | 57        |
|                                                                                    | Jiangsu       | 20         | 3         |
|                                                                                    | Jiangxi       | 18         | 0         |
|                                                                                    | Shanxi        | 15         | 0         |
|                                                                                    | Hebei         | 13         | 0         |
|                                                                                    | Chongqing     | 11         | 0         |
|                                                                                    | Tianjin       | 11         | 0         |
|                                                                                    | Xinjiang      | 11         | 0         |
|                                                                                    | Anhui         | 9          | 0         |
|                                                                                    | Henan         | 9          | 0         |
|                                                                                    | Gansu         | 6          | 0         |
|                                                                                    | Guanxi        | 5          | 0         |
|                                                                                    | Fujian        | 4          | 0         |
|                                                                                    | Hainan        | 4          | 1         |
|                                                                                    | Liaoning      | 4          | 0         |
| Neimeng                                                                            | 4             | 0          |           |
| Guizhou                                                                            | 3             | 1          |           |
| Jilin                                                                              | 2             | 0          |           |
| <b>Validation cohort 1</b>                                                         | <b>Region</b> | <b>ASD</b> | <b>NT</b> |
|                                                                                    | Hunan         | 31         | 32        |
|                                                                                    | Shandong      | 20         | 0         |
|                                                                                    | Guandong      | 6          | 0         |
|                                                                                    | Zhejiang      | 6          | 0         |
|                                                                                    | Chongqing     | 2          | 0         |
|                                                                                    | Hubei         | 2          | 0         |
|                                                                                    | Jiangsu       | 2          | 0         |
|                                                                                    | Gansu         | 1          | 0         |
|                                                                                    | Jiangxi       | 1          | 0         |
|                                                                                    | Shanghai      | 1          | 0         |
|                                                                                    | Sichuan       | 1          | 0         |

| Table5 Alpha diversity under different under different parameters |           |                   |         |               |                |            |
|-------------------------------------------------------------------|-----------|-------------------|---------|---------------|----------------|------------|
| shannon                                                           | 20 adults | 5.73 ± 0.756      | p value | Adults vs. NT | Adults vs. ASD | NT vs. ASD |
|                                                                   | NT        | 5.4206 ± 1.14     |         | 0.4691        | 0.0007         | <0.0001    |
|                                                                   | ASD       | 4.77 ± 1.16       |         |               |                |            |
| simpson                                                           | 20 adults | 0.94 ± 0.04       | p value | Adults vs. NT | Adults vs. ASD | NT vs. ASD |
|                                                                   | NT        | 0.91 ± 0.09       |         | 0.3992        | 0.0141         | <0.0001    |
|                                                                   | ASD       | 0.87 ± 0.12       |         |               |                |            |
| chao1                                                             | 20 adults | 2355.07 ± 1274.39 | p value | Adults vs. NT | Adults vs. ASD | NT vs. ASD |
|                                                                   | NT        | 2977.13 ± 1583.84 |         | 0.1283        | 0.9587         | <0.0001    |
|                                                                   | ASD       | 2267.15 ± 1294.37 |         |               |                |            |
| ace                                                               | 20 adults | 2394.17 ± 1329.29 | p value | Adults vs. NT | Adults vs. ASD | NT vs. ASD |
|                                                                   | NT        | 3052.70 ± 1630.33 |         | 0.1118        | 0.9717         | <0.0001    |
|                                                                   | ASD       | 2319.87 ± 1319.99 |         |               |                |            |
| goods_coverage                                                    | 20 adults | 99.51% ± 0.33%    | p value | NA            |                |            |
|                                                                   | NT        | 99.35% ± 0.39%    |         |               |                |            |
|                                                                   | ASD       | 99.55% ± 0.29%    |         |               |                |            |

| Shannon index |             |             |             |             |
|---------------|-------------|-------------|-------------|-------------|
|               | NT          |             | ASD         |             |
|               | mean        | sd          | mean        | sd          |
| 0-16mo        | 4.759399451 | 1.359547967 | 3.836082927 | 0.964003457 |
| 16-18mo       | 3.764213312 | 1.025357825 | 2.849265085 | 1.619845272 |
| 18-20mo       | 4.196894667 | 0.606140885 | 3.616706239 | 1.347681161 |
| 20-22mo       | 4.926090339 | 0.752870905 | 3.775844587 | 1.573532974 |
| 22-24mo       | 5.542285549 | 1.01700189  | 3.841787444 | 1.387423655 |
| 24-26mo       | 5.463804669 | 1.194155942 | 4.701179309 | 0.926512271 |
| 26-28mo       | 5.022808685 | 1.136191124 | 4.458895719 | 0.733147925 |
| 28-30mo       | 4.353316031 | 0.753168643 | 4.586324527 | 1.110997305 |
| 30-32mo       | 4.745291597 | 0.912644623 | 4.570967246 | 1.179000381 |
| 32-34mo       | 4.642527458 | 0.76418573  | 5.26308442  | 0.960932    |
| 34-36mo       | 5.21101315  | 0.84406933  | 4.647607285 | 1.099560467 |
| 3-4y          | 4.543924885 | 1.135308193 | 4.568936906 | 1.000936654 |
| 4-5y          | 5.59501416  | 0.995748552 | 4.928618373 | 1.122853308 |
| 5-6y          | 5.47851421  | 1.041302464 | 4.858354881 | 1.109141125 |
| 6-7y          | 5.743279675 | 1.157214041 | 4.97313772  | 1.213777533 |
| 7-8y          | 5.60510922  | 1.060199335 | 4.984953987 | 1.299020924 |
| 8-9y          | 6.011443948 | 1.199575446 | 5.329017922 | 1.058225814 |
| 9-16y         | 5.781164334 | 1.030728251 | 5.299373648 | 1.081186082 |
| adults        | 5.7284785   | 0.757131446 | 5.230236748 | 0.22090182  |

**Table 6 Host multifactorial effects on composition of gut microbiota calculated by EnvFit**

| Factors                            | EnvFit   |         |          |         |
|------------------------------------|----------|---------|----------|---------|
|                                    | ≤3y      |         | >3y      |         |
|                                    | r-square | p value | r-square | p value |
| ASD diagnosis                      | 0.0170   | 0.038   | 0.0173   | 0.001   |
| District                           | 0.0544   | 0.981   | 0.0295   | 0.196   |
| Age                                | 0.0384   | 0.001   | 0.0283   | 0.001   |
| Gender                             | 0.0059   | 0.292   | 0.0010   | 0.379   |
| Any GI problem                     | 0.0033   | 0.49    | 0.0050   | 0.01    |
| Esophageal reflux                  | 0.0033   | 0.505   | 0.0019   | 0.165   |
| Peptic ulcer                       | 0.0019   | 0.687   | 0.0030   | 0.041   |
| Dyspepsia                          | 0.0019   | 0.69    | 0.0022   | 0.106   |
| Abdominal distension               | 0.0166   | 0.033   | 0.0003   | 0.753   |
| Abdominal pain                     | 0.0168   | 0.021   | 0.0016   | 0.198   |
| Constipation                       | 0.0064   | 0.266   | 0.0049   | 0.009   |
| Abnormal stool consistency         | 0.0137   | 0.055   | 0.0006   | 0.569   |
| Any Sleep complaints               | 0.0153   | 0.045   | 0.0011   | 0.334   |
| Difficulty falling asleep          | 0.0089   | 0.149   | 0.0001   | 0.92    |
| Sleep fragmentation                | 0.0155   | 0.042   | 0.0024   | 0.089   |
| Short sleep duration               | 0.0021   | 0.638   | 0.0006   | 0.565   |
| Shallow sleep                      | 0.0131   | 0.057   | 0.0001   | 0.914   |
| Food allergy or intolerance        | 0.0070   | 0.233   | 0.0103   | 0.001   |
| Skin allergy                       | 0.0015   | 0.724   | 0.0004   | 0.707   |
| Respiratory hypersensitivity       | 0.0113   | 0.084   | 0.0027   | 0.072   |
| Antibiotic usage with in 3 mo      | 0.0149   | 0.047   | 0.0113   | 0.001   |
| Infection within 1 mo              | 0.0025   | 0.605   | 0.0002   | 0.791   |
| Age of mother during pregnancy     | 0.0000   | 1.000   | 0.0000   | 1.000   |
| Age of father during pregnancy     | 0.0000   | 1.000   | 0.0000   | 1.000   |
| Assisted reproduction              | 0.0111   | 0.09    | 0.0028   | 0.069   |
| Smoking                            | 0.0000   | 1.000   | 0.0001   | 0.965   |
| Drinking                           | 0.0056   | 0.329   | 0.0002   | 0.825   |
| Infection during pregnancy         | 0.0023   | 0.603   | 0.0007   | 0.489   |
| Eclampsia/Pre-eclampsia            | 0.0052   | 0.37    | 0.0011   | 0.355   |
| Gestational age                    | 0.0000   | 1.000   | 0.0000   | 1.000   |
| Mode of delivery                   | 0.0037   | 0.454   | 0.0024   | 0.081   |
| Neonatal asphyxia                  | 0.0001   | 0.971   | 0.0028   | 0.062   |
| Family history of mental disorders | 0.0129   | 0.054   | 0.0030   | 0.049   |
| ...                                |          |         |          |         |

| Table 7 Summary of <b>demographic and clinical characteristics</b> of healthy children (NT) and kids with ASD |                       |                                                      |                                     |             |                              |                    |              |
|---------------------------------------------------------------------------------------------------------------|-----------------------|------------------------------------------------------|-------------------------------------|-------------|------------------------------|--------------------|--------------|
|                                                                                                               |                       |                                                      |                                     | ASD         | NT (healthy adults included) |                    |              |
|                                                                                                               |                       |                                                      | mean ± SEM                          |             |                              |                    |              |
| Current cohort                                                                                                | Diagnosis             | Total ASD score                                      | mean ± SEM                          | 4.18 ± 0.15 | /                            |                    |              |
|                                                                                                               |                       | Repetitive behavior                                  | mean ± SEM                          | 1.38 ± 0.05 | /                            |                    |              |
|                                                                                                               |                       | Social retardation                                   | mean ± SEM                          | 2.00 ± 0.07 | /                            |                    |              |
|                                                                                                               |                       | Language retardation                                 | mean ± SEM                          | 2.04 ± 0.07 | /                            |                    |              |
|                                                                                                               | Demographic           | Gender                                               | Female (Male)                       |             | 127 (645)                    | 217 (233)          |              |
|                                                                                                               |                       | Any GI problems                                      | Yes/all                             |             | 494/772 (63.9%)              | 48/450 (10.7%)     |              |
|                                                                                                               | Comorbidity           | Mean value of total GI problem score of each subject | mean ± SEM                          |             | 1.05 ± 1.33                  | 0.18 ± 0.56        |              |
|                                                                                                               |                       | Esophageal reflux                                    | Yes/all                             |             | 54/772 (6.9%)                | 2/450 (0.4%)       |              |
|                                                                                                               |                       | Peptic ulcer                                         | Yes/all                             |             | 10/772 (1.3%)                | 1/450 (0.2%)       |              |
|                                                                                                               |                       | Dyspepsia                                            | Yes/all                             |             | 238/772 (30.8%)              | 15/450 (3.3%)      |              |
|                                                                                                               |                       | Abdominal distension                                 | Yes/all                             |             | 129/772 (16.7%)              | 1/450 (0.2%)       |              |
|                                                                                                               |                       | Abdominal pain                                       | Yes/all                             |             | 61/772 (7.9%)                | 9/450 (2%)         |              |
|                                                                                                               |                       | Constipation                                         | Yes/all                             |             | 346/772 (44.8%)              | 19/450 (4.2%)      |              |
|                                                                                                               |                       | Abnormal stool consistency                           | Yes/all                             |             | 127/772 (16.4%)              | 7/450 (1.6%)       |              |
|                                                                                                               |                       | Any sleep complaints                                 | Yes/all                             |             | 354/772 (45.8%)              | 21/450 (4.7%)      |              |
|                                                                                                               |                       | Mean value of sleep complaints score                 | mean ± SEM                          |             | 0.71 ± 1.02                  | 0.07 ± 0.25        |              |
|                                                                                                               |                       | Difficulty falling asleep                            | Yes/all                             |             | 193/772 (25.0%)              | 2/450 (0.4%)       |              |
|                                                                                                               |                       | Sleep fragmentation                                  | Yes/all                             |             | 216/772 (27.9%)              | 9/450 (2.1%)       |              |
|                                                                                                               |                       | Short sleep duration                                 | Yes/all                             |             | 84/772 (10.9%)               | 7/450 (1.6%)       |              |
|                                                                                                               |                       | Shallow sleep                                        | Yes/all                             |             | 119/772 (15.4%)              | 7/450 (1.6%)       |              |
|                                                                                                               |                       | Total Allergy score                                  | mean ± SEM                          |             | 0.67 ± 0.03                  | 0.13 ± 0.02        |              |
|                                                                                                               |                       | Food allergy or intolerance                          | Yes/all                             |             | 353/772 (45.7%)              | 15/450 (3.3%)      |              |
|                                                                                                               |                       | Skin allergy                                         | Yes/all                             |             | 157/772 (20.3%)              | 15/450 (3.3%)      |              |
|                                                                                                               |                       | Respiratory hypersensitivity                         | Yes/all                             |             | 109/772 (14.1%)              | 5/450 (1.1%)       |              |
|                                                                                                               |                       | Clinical                                             | Antibiotic usage within 3 mo        | Yes/all     |                              | 67/772 (8.7%)      | 3/450 (0.6%) |
|                                                                                                               |                       |                                                      | Any infection within 1 mo           | Yes/all     |                              | 21/772 (2.7%)      | 2/450 (0.4%) |
|                                                                                                               | Any neonatal asphyxia |                                                      | Yes/all                             |             | 51/772 (6.6%)                | 1/450 (0.02%)      |              |
|                                                                                                               | Perinatal             | Age of mother during pregnancy                       | mean ± SEM                          |             | 29.28 ± 0.20                 | 26.58 ± 0.34       |              |
|                                                                                                               |                       | Age of father during pregnancy                       | mean ± SEM                          |             | 31.83 ± 0.21                 | 29.88 ± 0.26       |              |
|                                                                                                               |                       | Premature delivery                                   | Yes/all/NA or Forgotten             |             | 83/772 (10.7%) /0            | 18/197 (9.1%) /253 |              |
|                                                                                                               |                       | Mode of delivery                                     | Cesarean section/Vaginally delivery |             | 446/327                      | 106/343            |              |
|                                                                                                               |                       | Assisted reproduction                                | Yes/all                             |             | 97/772 (12.5%)               | 7/450 (1.6%)       |              |
|                                                                                                               |                       | Eclampsia/Pre-eclampsia                              | Yes/all                             |             | 9/772 (1.2%)                 | 2/450 (0.4%)       |              |
|                                                                                                               |                       | Infection during pregnancy                           | Yes/all                             |             | 55/772 (7.1%)                | 1/450 (0.2%)       |              |
|                                                                                                               | Family history        | Family history of mental disorders                   | Yes/all                             |             | 42/772 (5.4%)                | 0/450 (0%)         |              |
|                                                                                                               | Validation cohort 1   |                                                      |                                     |             | ASD                          | NT                 |              |
|                                                                                                               |                       | Diagnosis                                            | Total ASD score                     | mean ± SEM  | 6.21 ± 0.18                  | /                  |              |
|                                                                                                               |                       |                                                      | Repetitive behavior                 | mean ± SEM  | 1.62 ± 0.08                  | /                  |              |
|                                                                                                               |                       |                                                      | Social retardation                  | mean ± SEM  | 2.34 ± 0.07                  | /                  |              |
|                                                                                                               |                       |                                                      | Language retardation                | mean ± SEM  | 2.27 ± 0.09                  | /                  |              |
| Demographic                                                                                                   |                       | Gender                                               | Female (Male)                       |             | 15 (73)                      | 14 (32)            |              |
|                                                                                                               |                       | Any GI problems                                      | Yes/all                             |             | 45/73 (61.6%)                | 5/32 (15.6%)       |              |
| Comorbidity                                                                                                   |                       | Mean value of total GI problem score of each subject | mean ± SEM                          |             | 1.33 ± 0.17                  | 0.31 ± 0.15        |              |
|                                                                                                               |                       | Esophageal reflux                                    | Yes/all                             |             | 8/73 (10.9%)                 | 0/32 (0%)          |              |
|                                                                                                               |                       | Peptic ulcer                                         | Yes/all                             |             | 3/73 (4.1%)                  | 0/32 (0%)          |              |
|                                                                                                               |                       | Dyspepsia                                            | Yes/all                             |             | 32/73 (43.8%)                | 3/32 (9.4%)        |              |
|                                                                                                               |                       | Abdominal distension                                 | Yes/all                             |             | 19/73 (26.0%)                | 0/32 (0%)          |              |
|                                                                                                               |                       | Abdominal pain                                       | Yes/all                             |             | 8/73 (10.9%)                 | 1/32 (3.1%)        |              |
|                                                                                                               |                       | Constipation                                         | Yes/all                             |             | 23/73 (31.5%)                | 4/32 (12.5%)       |              |
|                                                                                                               |                       | Abnormal stool consistency                           | Yes/all                             |             | 1/73 (1.44%)                 | 2/32 (6.3%)        |              |
|                                                                                                               |                       | Any sleep complaints                                 | Yes/all                             |             | 37/73 (50.7%)                | 2/32 (6.3%)        |              |
|                                                                                                               |                       | Mean value of sleep complaints score                 | mean ± SEM                          |             | 0.78 ± 0.13                  | 0.09 ± 0.07        |              |
|                                                                                                               |                       | Difficulty falling asleep                            | Yes/all                             |             | 24/73 (32.9%)                | 0/32 (0%)          |              |

|  |           |                                |                                     |                |                |
|--|-----------|--------------------------------|-------------------------------------|----------------|----------------|
|  | Clinical  | Sleep fragmentation            | Yes/all                             | 13/73 (17.8%)  | 2/32 (6.3%)    |
|  |           | Short sleep duration           | Yes/all                             | 11/73 (15.1%)  | 0/32 (0%)      |
|  |           | Shallow sleep                  | Yes/all                             | 9/73 (12.3%)   | 1/32 (3.1%)    |
|  |           | Total Allergy score            | mean ± SEM                          | 0.64 ± 0.10    | 0.28 ± 0.09    |
|  |           | Food allergy or intolerance    | Yes/all                             | 26/73 (35.6%)  | 3/32 (9.4%)    |
|  |           | Skin allergy                   | Yes/all                             | 14/73 (19.2%)  | 5/32 (15.6%)   |
|  |           | Respiratory hypersensitivity   | Yes/all                             | 7/73 (9.6%)    | 1/32 (3.1%)    |
|  |           | Antibiotic usage within 3 mo   | Yes/all                             | 7/73 (9.6%)    | 2/32 (6.3%)    |
|  |           | Any infection within 1 mo      | Yes/all                             | 2/73 (2.7%)    | 0/32 (0%)      |
|  |           | Any neonatal asphyxia          | Yes/all                             | 6/73 (8.2%)    | 1/32 (3.1%)    |
|  | Perinatal | Age of mother during pregnancy | mean ± SEM                          | 28.83 ± 0.41   | 28.67 ± 0.27   |
|  |           | Age of father during pregnancy | mean ± SEM                          | 30.00 ± 0.43   | 28.33 ± 0.80   |
|  |           | Premature delivery             | Yes/all/NA or Forgotten             | 4/72 (5.5%) /1 | 1/32 (3.1%) /0 |
|  |           | Mode of delivery               | Cesarean section/Vaginally delivery | 31/42          | 12/20          |
|  |           | Assisted reproduction          | Yes/all                             | 11/73 (15.1%)  | 1/32 (3.1%)    |
|  |           | Eclampsia/Pre-eclampsia        | Yes/all                             | 1/73 (1.44%)   | 0/32 (0%)      |
|  |           | Infection during pregnancy     | Yes/all                             | 8/73 (10.9%)   | 0/32 (0%)      |
|  |           | Family history                 | Family history of mental disorders  | Yes/all        | 3/72 (4.2%)    |

Table 8 Predicted microbiota age and Physiological age.

| Group | Physiological age | Predicted microbiota age |
|-------|-------------------|--------------------------|
| ASD   | 1.1               | 1.063991283              |
| ASD   | 1.1               | 1.781075827              |
| ASD   | 1.11              | 3.15698653               |
| ASD   | 1.4               | 0.565391134              |
| ASD   | 1.4               | 0.70140548               |
| ASD   | 1.4               | 2.292544432              |
| ASD   | 1.4               | 4.436245802              |
| ASD   | 1.4               | 0.377813951              |
| ASD   | 1.5               | 1.282486519              |
| ASD   | 1.6               | 0.36967383               |
| ASD   | 1.6               | 0.529338239              |
| ASD   | 1.6               | 2.217356637              |
| ASD   | 1.6               | 2.241657771              |
| ASD   | 1.6               | 3.203106806              |
| ASD   | 1.7               | 0.840901886              |
| ASD   | 1.7               | 1.937369565              |
| ASD   | 1.8               | 0.318060694              |
| ASD   | 1.8               | 0.803481103              |
| ASD   | 1.8               | 0.882089074              |
| ASD   | 1.8               | 1.754950471              |
| ASD   | 1.8               | 1.960165915              |
| ASD   | 1.8               | 2.237232407              |
| ASD   | 1.8               | 3.204896043              |
| ASD   | 1.9               | 2.18280643               |
| ASD   | 1.9               | 3.550967351              |
| ASD   | 2                 | 0.467091715              |
| ASD   | 2                 | 1.176347592              |
| ASD   | 2                 | 1.259873981              |
| ASD   | 2                 | 1.741770705              |
| ASD   | 2                 | 1.770958338              |
| ASD   | 2                 | 1.91951554               |
| ASD   | 2                 | 1.926712148              |
| ASD   | 2                 | 1.93072657               |
| ASD   | 2                 | 1.943004082              |
| ASD   | 2                 | 1.945972593              |
| ASD   | 2                 | 2.108131684              |
| ASD   | 2                 | 2.187255621              |
| ASD   | 2                 | 2.29659678               |
| ASD   | 2                 | 2.520844315              |
| ASD   | 2                 | 2.935516641              |
| ASD   | 2                 | 3.050283375              |
| ASD   | 2                 | 3.161383723              |
| ASD   | 2                 | 3.516339334              |
| ASD   | 2                 | 3.709160877              |
| ASD   | 2                 | 4.515946781              |
| ASD   | 2                 | 5.023961999              |
| ASD   | 2                 | 29.64666025              |
| ASD   | 2                 | 44.64305183              |
| ASD   | 2                 | 54.19206455              |
| ASD   | 2.1               | 1.245212627              |
| ASD   | 2.1               | 1.2649716                |
| ASD   | 2.1               | 1.559959012              |
| ASD   | 2.1               | 1.766049805              |
| ASD   | 2.1               | 1.77713922               |
| ASD   | 2.1               | 1.96702221               |
| ASD   | 2.1               | 2.124653667              |
| ASD   | 2.1               | 2.251197644              |
| ASD   | 2.1               | 2.252430715              |
| ASD   | 2.1               | 2.527564928              |
| ASD   | 2.1               | 2.900313087              |
| ASD   | 2.1               | 3.562744701              |
| ASD   | 2.1               | 3.674741159              |
| ASD   | 2.1               | 3.822704226              |
| ASD   | 2.1               | 3.318712701              |
| ASD   | 2.11              | 1.760552255              |
| ASD   | 2.11              | 1.932818675              |
| ASD   | 2.11              | 2.595862962              |
| ASD   | 2.11              | 3.365695231              |

| Mean value of Physiological age - Predicted microbiota age of each subject |              |             |              |             |
|----------------------------------------------------------------------------|--------------|-------------|--------------|-------------|
| mean $\pm$ SEM, p value were calculated by one-way ANOVA respectively.     |              |             |              |             |
|                                                                            | NT           |             | ASD          |             |
|                                                                            | mean         | SEM         | mean         | SEM         |
| 0-16mo                                                                     | -7.388849941 | 6.164149533 | -0.867568166 | 0.615385255 |
| 16-18mo                                                                    | -0.698748974 | 0.742024791 | -0.385390627 | 0.539326174 |
| 18-20mo                                                                    | -0.547379962 | 0.228995236 | -0.080775177 | 0.362014509 |
| 20-22mo                                                                    | -0.980615501 | 0.265384868 | -0.109104888 | 0.538079514 |
| 22-24mo                                                                    | -2.569078497 | 0.184055844 | -5.626443526 | 2.997902786 |
| 24-26mo                                                                    | -2.180152462 | 0.793446388 | -1.061452151 | 0.2511445   |
| 26-28mo                                                                    | -1.294482887 | 0.658205823 | -1.170565375 | 0.483696901 |
| 28-30mo                                                                    | -0.634614481 | 0.416162351 | 0.017160573  | 0.142037715 |
| 30-32mo                                                                    | -0.661850718 | 0.369507484 | -0.904633062 | 0.286685052 |
| 32-34mo                                                                    | -0.515342378 | 0.713771612 | -0.802546909 | 0.31722984  |
| 34-36mo                                                                    | -2.395941997 | 0.411907781 | -3.125436405 | 1.530681936 |
| 3-4y                                                                       | -2.89390495  | 1.938138562 | -1.476573692 | 0.885561967 |
| 4-5y                                                                       | -5.079561805 | 1.481656833 | -2.768736079 | 1.069005948 |
| 5-6y                                                                       | -8.958558559 | 2.389885103 | -2.195826422 | 1.160442858 |
| 6-7y                                                                       | -10.03102089 | 2.415255895 | -1.895388965 | 1.378608687 |
| 7-8y                                                                       | -8.594485612 | 3.648938311 | -7.303945452 | 3.21544231  |
| 8-9y                                                                       | -11.1081029  | 3.833408235 | 0.063331717  | 1.765338513 |
| 9-16y                                                                      | -3.629092634 | 2.295032983 | -8.023251275 | 3.075474676 |
| adults                                                                     | -2.663537246 | 3.010763383 | -18.17773156 | 14.77089379 |

| Microbiota-for-age Z score (MAZ) of each subject.                                                                                                                                                                                      |                   |              |
|----------------------------------------------------------------------------------------------------------------------------------------------------------------------------------------------------------------------------------------|-------------------|--------------|
| The value of MAZ of each subject was calculated as: (microbiota age - median microbiota age of healthy children of same physiological age) / (standard deviation of microbiota age of healthy children of the same physiological age). |                   |              |
|                                                                                                                                                                                                                                        | ASD               |              |
|                                                                                                                                                                                                                                        | Physiological age | MAZ          |
|                                                                                                                                                                                                                                        | 1.1               | -0.039034064 |
|                                                                                                                                                                                                                                        | 1.1               | -0.00024896  |
|                                                                                                                                                                                                                                        | 1.11              | 0.074170215  |
|                                                                                                                                                                                                                                        | 1.4               | -0.066001956 |
|                                                                                                                                                                                                                                        | 1.4               | -0.05864532  |
|                                                                                                                                                                                                                                        | 1.4               | 0.027414951  |
|                                                                                                                                                                                                                                        | 1.4               | 0.143361783  |
|                                                                                                                                                                                                                                        | 1.4               | -0.076147483 |
|                                                                                                                                                                                                                                        | 1.5               | -0.720506371 |
|                                                                                                                                                                                                                                        | 1.6               | -1.46481042  |
|                                                                                                                                                                                                                                        | 1.6               | -1.334620658 |
|                                                                                                                                                                                                                                        | 1.6               | 0.041783222  |
|                                                                                                                                                                                                                                        | 1.6               | 0.061598276  |
|                                                                                                                                                                                                                                        | 1.6               | 0.845560218  |
|                                                                                                                                                                                                                                        | 1.7               | -3.011405719 |
|                                                                                                                                                                                                                                        | 1.7               | -0.18657188  |
|                                                                                                                                                                                                                                        | 1.8               | -1.506895578 |
|                                                                                                                                                                                                                                        | 1.8               | -1.111085594 |
|                                                                                                                                                                                                                                        | 1.8               | -1.046988949 |
|                                                                                                                                                                                                                                        | 1.8               | -0.335261034 |
|                                                                                                                                                                                                                                        | 1.8               | -0.167929129 |
|                                                                                                                                                                                                                                        | 1.8               | 0.05798985   |
|                                                                                                                                                                                                                                        | 1.8               | 0.847019155  |
|                                                                                                                                                                                                                                        | 1.9               | -0.468395672 |
|                                                                                                                                                                                                                                        | 1.9               | 1.935357817  |
|                                                                                                                                                                                                                                        | 2                 | -3.48277444  |
|                                                                                                                                                                                                                                        | 2                 | -2.236666425 |
|                                                                                                                                                                                                                                        | 2                 | -2.089916985 |
|                                                                                                                                                                                                                                        | 2                 | -1.243261513 |
|                                                                                                                                                                                                                                        | 2                 | -4.796785208 |
|                                                                                                                                                                                                                                        | 2                 | -4.430704934 |
|                                                                                                                                                                                                                                        | 2                 | -4.412970781 |
|                                                                                                                                                                                                                                        | 2                 | -4.40307829  |
|                                                                                                                                                                                                                                        | 2                 | -4.372823582 |
|                                                                                                                                                                                                                                        | 2                 | -4.365508465 |
|                                                                                                                                                                                                                                        | 2                 | -3.965909901 |
|                                                                                                                                                                                                                                        | 2                 | -3.770929706 |
|                                                                                                                                                                                                                                        | 2                 | -3.501487087 |
|                                                                                                                                                                                                                                        | 2                 | -2.948887834 |
|                                                                                                                                                                                                                                        | 2                 | -1.927036615 |
|                                                                                                                                                                                                                                        | 2                 | -1.64422409  |
|                                                                                                                                                                                                                                        | 2                 | -1.370446412 |
|                                                                                                                                                                                                                                        | 2                 | -0.495751377 |
|                                                                                                                                                                                                                                        | 2                 | -0.020593243 |
|                                                                                                                                                                                                                                        | 2                 | 1.96751908   |
|                                                                                                                                                                                                                                        | 2                 | 3.219389384  |
|                                                                                                                                                                                                                                        | 2                 | excluded     |
|                                                                                                                                                                                                                                        | 2                 | excluded     |
|                                                                                                                                                                                                                                        | 2                 | excluded     |
|                                                                                                                                                                                                                                        | 2.1               | -1.044695913 |
|                                                                                                                                                                                                                                        | 2.1               | -1.03346807  |
|                                                                                                                                                                                                                                        | 2.1               | -0.865844365 |
|                                                                                                                                                                                                                                        | 2.1               | -0.748735291 |
|                                                                                                                                                                                                                                        | 2.1               | -0.74243384  |
|                                                                                                                                                                                                                                        | 2.1               | -0.634534692 |
|                                                                                                                                                                                                                                        | 2.1               | -0.544962161 |
|                                                                                                                                                                                                                                        | 2.1               | -0.473054787 |
|                                                                                                                                                                                                                                        | 2.1               | -0.472354107 |
|                                                                                                                                                                                                                                        | 2.1               | -0.316011787 |
|                                                                                                                                                                                                                                        | 2.1               | -0.104201299 |
|                                                                                                                                                                                                                                        | 2.1               | 0.272218973  |
|                                                                                                                                                                                                                                        | 2.1               | 0.335859863  |
|                                                                                                                                                                                                                                        | 2.1               | 0.419938425  |
|                                                                                                                                                                                                                                        | 2.1               | 0.133550181  |

|     |      |             |
|-----|------|-------------|
| ASD | 2.11 | 3.590261744 |
| ASD | 2.11 | 4.105028244 |
| ASD | 2.11 | 4.652653031 |
| ASD | 2.11 | 7.336691931 |
| ASD | 2.11 | 8.579041071 |
| ASD | 2.2  | 0.383731536 |
| ASD | 2.2  | 1.133225705 |
| ASD | 2.2  | 1.909490027 |
| ASD | 2.2  | 3.842345749 |
| ASD | 2.2  | 3.848045799 |
| ASD | 2.2  | 3.92455407  |
| ASD | 2.2  | 4.01154422  |
| ASD | 2.3  | 1.753805439 |
| ASD | 2.3  | 1.76626794  |
| ASD | 2.3  | 1.768342674 |
| ASD | 2.3  | 1.775403517 |
| ASD | 2.3  | 1.934150894 |
| ASD | 2.3  | 1.951543423 |
| ASD | 2.3  | 1.969422452 |
| ASD | 2.3  | 1.975056921 |
| ASD | 2.3  | 2.32311893  |
| ASD | 2.3  | 2.840479095 |
| ASD | 2.3  | 2.916988897 |
| ASD | 2.3  | 3.070233725 |
| ASD | 2.3  | 3.506979659 |
| ASD | 2.4  | 1.182039351 |
| ASD | 2.4  | 1.433945643 |
| ASD | 2.4  | 1.769037947 |
| ASD | 2.4  | 1.770056576 |
| ASD | 2.4  | 1.777827079 |
| ASD | 2.4  | 1.799120598 |
| ASD | 2.4  | 2.436815482 |
| ASD | 2.4  | 2.49150978  |
| ASD | 2.4  | 3.041442528 |
| ASD | 2.4  | 1.589790419 |
| ASD | 2.5  | 0.888687275 |
| ASD | 2.5  | 1.696395082 |
| ASD | 2.5  | 1.924532332 |
| ASD | 2.5  | 1.933812387 |
| ASD | 2.5  | 1.934680137 |
| ASD | 2.5  | 2.234722289 |
| ASD | 2.5  | 2.462285846 |
| ASD | 2.5  | 2.565051084 |
| ASD | 2.5  | 2.826727351 |
| ASD | 2.5  | 3.132576088 |
| ASD | 2.5  | 3.706315006 |
| ASD | 2.6  | 1.542560885 |
| ASD | 2.6  | 1.595070732 |
| ASD | 2.6  | 1.753531106 |
| ASD | 2.6  | 1.780306071 |
| ASD | 2.6  | 1.805664947 |
| ASD | 2.6  | 1.894824741 |
| ASD | 2.6  | 1.909931041 |
| ASD | 2.6  | 1.955851225 |
| ASD | 2.6  | 3.133341616 |
| ASD | 2.6  | 3.173000092 |
| ASD | 2.6  | 3.229318281 |
| ASD | 2.6  | 3.257407069 |
| ASD | 2.6  | 3.455729425 |
| ASD | 2.6  | 3.796997905 |
| ASD | 2.6  | 3.883443524 |
| ASD | 2.6  | 3.891048426 |
| ASD | 2.7  | 1.730023456 |
| ASD | 2.7  | 1.7549687   |
| ASD | 2.7  | 1.768088582 |
| ASD | 2.7  | 1.907207444 |
| ASD | 2.7  | 2.988800014 |
| ASD | 2.7  | 4.382687517 |
| ASD | 2.8  | 1.944459197 |
| ASD | 2.8  | 2.286573842 |
| ASD | 2.8  | 2.662176127 |
| ASD | 2.8  | 2.818519699 |
| ASD | 2.8  | 3.087934721 |

|  |      |              |
|--|------|--------------|
|  | 2.11 | -0.75185922  |
|  | 2.11 | -0.653970516 |
|  | 2.11 | -0.277202098 |
|  | 2.11 | 0.160247543  |
|  | 2.11 | 0.287855263  |
|  | 2.11 | 0.580366281  |
|  | 2.11 | 0.891548699  |
|  | 2.11 | 3.863399312  |
|  | 2.11 | 5.139408564  |
|  | 2.2  | -3.277944053 |
|  | 2.2  | -2.508143147 |
|  | 2.2  | -1.71084678  |
|  | 2.2  | 0.274377586  |
|  | 2.2  | 0.280232072  |
|  | 2.2  | 0.358813252  |
|  | 2.2  | 0.448160307  |
|  | 2.3  | -1.870749474 |
|  | 2.3  | -1.857949314 |
|  | 2.3  | -1.855818368 |
|  | 2.3  | -1.848566219 |
|  | 2.3  | -1.685517752 |
|  | 2.3  | -1.667653992 |
|  | 2.3  | -1.64929055  |
|  | 2.3  | -1.643503421 |
|  | 2.3  | -1.286011047 |
|  | 2.3  | -0.754633566 |
|  | 2.3  | -0.676050813 |
|  | 2.3  | -0.518653982 |
|  | 2.3  | -0.070074887 |
|  | 2.4  | -2.458006948 |
|  | 2.4  | -2.317962595 |
|  | 2.4  | -1.771870471 |
|  | 2.4  | -1.770210436 |
|  | 2.4  | -1.757547028 |
|  | 2.4  | -1.722845476 |
|  | 2.4  | -0.683608975 |
|  | 2.4  | -0.59447495  |
|  | 2.4  | 0.301737642  |
|  | 2.4  | -2.063985994 |
|  | 2.5  | -3.206557459 |
|  | 2.5  | -1.890254857 |
|  | 2.5  | -1.518464894 |
|  | 2.5  | -1.503341403 |
|  | 2.5  | -1.501927253 |
|  | 2.5  | -1.012955545 |
|  | 2.5  | -0.642100515 |
|  | 2.5  | -0.474626401 |
|  | 2.5  | -0.048178683 |
|  | 2.5  | 0.450255882  |
|  | 2.5  | 1.385264835  |
|  | 2.6  | -2.140954864 |
|  | 2.6  | -2.05538079  |
|  | 2.6  | -1.797141609 |
|  | 2.6  | -1.753507072 |
|  | 2.6  | -1.712180303 |
|  | 2.6  | -1.566878663 |
|  | 2.6  | -1.542260277 |
|  | 2.6  | -1.338984049 |
|  | 2.6  | 0.28453038   |
|  | 2.6  | 0.339211174  |
|  | 2.6  | 0.416862246  |
|  | 2.6  | 0.455590845  |
|  | 2.6  | 0.729036139  |
|  | 2.6  | 1.199574417  |
|  | 2.6  | 1.318764953  |
|  | 2.6  | 1.329250532  |
|  | 2.7  | -1.650353588 |
|  | 2.7  | -1.615959283 |
|  | 2.7  | -1.597869694 |
|  | 2.7  | -1.406053708 |
|  | 2.7  | 0.085237564  |
|  | 2.7  | 2.007118617  |
|  | 2.8  | -0.10017412  |

|     |     |             |
|-----|-----|-------------|
| ASD | 2.8 | 3.439633355 |
| ASD | 2.8 | 3.463212465 |
| ASD | 2.8 | 4.314469988 |
| ASD | 2.8 | 1.941287967 |
| ASD | 2.9 | 0.877654367 |
| ASD | 2.9 | 2.942514612 |
| ASD | 2.9 | 2.982310828 |
| ASD | 2.9 | 3.120210965 |
| ASD | 2.9 | 3.316236645 |
| ASD | 2.9 | 3.393061275 |
| ASD | 2.9 | 3.492670981 |
| ASD | 2.9 | 3.881833807 |
| ASD | 3   | 0.279977415 |
| ASD | 3   | 1.69775407  |
| ASD | 3   | 1.812554288 |
| ASD | 3   | 1.889455816 |
| ASD | 3   | 1.913101432 |
| ASD | 3   | 1.920273411 |
| ASD | 3   | 1.926564964 |
| ASD | 3   | 1.933868368 |
| ASD | 3   | 1.950875952 |
| ASD | 3   | 1.997979799 |
| ASD | 3   | 2.223934968 |
| ASD | 3   | 2.229050172 |
| ASD | 3   | 2.270732445 |
| ASD | 3   | 2.286069299 |
| ASD | 3   | 2.299678108 |
| ASD | 3   | 2.309151491 |
| ASD | 3   | 2.31924965  |
| ASD | 3   | 2.33338209  |
| ASD | 3   | 2.341143345 |
| ASD | 3   | 2.371425274 |
| ASD | 3   | 2.394555312 |
| ASD | 3   | 2.467509714 |
| ASD | 3   | 2.467827638 |
| ASD | 3   | 2.527927329 |
| ASD | 3   | 2.56099319  |
| ASD | 3   | 2.564178516 |
| ASD | 3   | 2.637520547 |
| ASD | 3   | 2.708135421 |
| ASD | 3   | 2.742380266 |
| ASD | 3   | 2.787423827 |
| ASD | 3   | 2.848511835 |
| ASD | 3   | 2.8500213   |
| ASD | 3   | 2.911394328 |
| ASD | 3   | 2.939101215 |
| ASD | 3   | 2.991209577 |
| ASD | 3   | 3.000061778 |
| ASD | 3   | 3.031294504 |
| ASD | 3   | 3.070955957 |
| ASD | 3   | 3.106337428 |
| ASD | 3   | 3.123236602 |
| ASD | 3   | 3.126485594 |
| ASD | 3   | 3.126938398 |
| ASD | 3   | 3.138201396 |
| ASD | 3   | 3.151239691 |
| ASD | 3   | 3.151762784 |
| ASD | 3   | 3.169147412 |
| ASD | 3   | 3.171847353 |
| ASD | 3   | 3.178289885 |
| ASD | 3   | 3.184085483 |
| ASD | 3   | 3.210379784 |
| ASD | 3   | 3.21554402  |
| ASD | 3   | 3.239719974 |
| ASD | 3   | 3.247677172 |
| ASD | 3   | 3.261283661 |
| ASD | 3   | 3.374584772 |
| ASD | 3   | 3.593280436 |
| ASD | 3   | 3.701827615 |
| ASD | 3   | 3.79121394  |
| ASD | 3   | 3.840372734 |
| ASD | 3   | 3.857447748 |
| ASD | 3   | 3.862951135 |

|  |     |              |
|--|-----|--------------|
|  | 2.8 | 0.094461381  |
|  | 2.8 | 0.308148635  |
|  | 2.8 | 0.397095454  |
|  | 2.8 | 0.550370763  |
|  | 2.8 | 0.750458777  |
|  | 2.8 | 0.763873379  |
|  | 2.8 | 1.248169907  |
|  | 2.8 | -0.707099593 |
|  | 2.9 | 0.467638509  |
|  | 2.9 | 0.49027933   |
|  | 2.9 | 0.56873333   |
|  | 2.9 | 0.680256052  |
|  | 2.9 | 0.723963039  |
|  | 2.9 | 0.780632887  |
|  | 2.9 | 1.002034989  |
|  | 2.9 | -1.047129332 |
|  | 3   | -0.240529339 |
|  | 3   | -0.175217321 |
|  | 3   | -0.131466585 |
|  | 3   | -0.118014147 |
|  | 3   | -0.113933872 |
|  | 3   | -0.110354488 |
|  | 3   | -0.106199443 |
|  | 3   | -0.096523507 |
|  | 3   | -0.069725236 |
|  | 3   | 0.058824939  |
|  | 3   | 0.061735076  |
|  | 3   | 0.08544891   |
|  | 3   | 0.094174337  |
|  | 3   | 0.101916646  |
|  | 3   | 0.107306233  |
|  | 3   | 0.113051267  |
|  | 3   | 0.12109148   |
|  | 3   | 0.125507005  |
|  | 3   | 0.142734967  |
|  | 3   | 0.155894084  |
|  | 3   | 0.197399226  |
|  | 3   | 0.197580099  |
|  | 3   | 0.231771951  |
|  | 3   | 0.250583745  |
|  | 3   | 0.252395938  |
|  | 3   | 0.294121608  |
|  | 3   | 0.334295748  |
|  | 3   | 0.353778289  |
|  | 3   | 0.379404423  |
|  | 3   | 0.414158548  |
|  | 3   | 0.415017312  |
|  | 3   | 0.44993359   |
|  | 3   | 0.465696563  |
|  | 3   | 0.495341996  |
|  | 3   | 0.500378181  |
|  | 3   | 0.51814707   |
|  | 3   | 0.540711222  |
|  | 3   | 0.560840412  |
|  | 3   | 0.570454671  |
|  | 3   | 0.572303084  |
|  | 3   | 0.572560693  |
|  | 3   | 0.578968426  |
|  | 3   | 0.586386159  |
|  | 3   | 0.586683757  |
|  | 3   | 0.596574201  |
|  | 3   | 0.598110249  |
|  | 3   | 0.601775527  |
|  | 3   | 0.605072753  |
|  | 3   | 0.620032079  |
|  | 3   | 0.62297011   |
|  | 3   | 0.636724268  |
|  | 3   | 0.641251269  |
|  | 3   | 0.648992258  |
|  | 3   | 0.713451406  |
|  | 3   | 0.837871511  |
|  | 3   | 0.899626058  |
|  | 3   | 0.950479631  |



|     |      |             |
|-----|------|-------------|
| ASD | 3    | 4.059955801 |
| ASD | 3    | 4.082409176 |
| ASD | 3    | 4.487520725 |
| ASD | 3    | 4.534095578 |
| ASD | 3    | 5.216815777 |
| ASD | 3    | 6.424577698 |
| ASD | 3    | 7.567975879 |
| ASD | 3    | 35.20182233 |
| ASD | 3    | 74.50182128 |
| ASD | 3    | 75.18150939 |
| ASD | 3    | 3.83856486  |
| ASD | 3    | 2.361848916 |
| ASD | 3    | 2.804906202 |
| ASD | 3.1  | 1.81196642  |
| ASD | 3.1  | 1.919248295 |
| ASD | 3.1  | 1.946590662 |
| ASD | 3.1  | 2.520507102 |
| ASD | 3.1  | 2.60568842  |
| ASD | 3.1  | 2.745487178 |
| ASD | 3.1  | 2.890265814 |
| ASD | 3.1  | 3.09071153  |
| ASD | 3.1  | 3.118491282 |
| ASD | 3.1  | 3.197441022 |
| ASD | 3.1  | 3.278552373 |
| ASD | 3.1  | 3.323930805 |
| ASD | 3.1  | 3.608764132 |
| ASD | 3.1  | 3.838865067 |
| ASD | 3.1  | 4.052126446 |
| ASD | 3.1  | 4.506350716 |
| ASD | 3.1  | 4.627806452 |
| ASD | 3.1  | 5.527089849 |
| ASD | 3.11 | 1.96369789  |
| ASD | 3.11 | 2.748162871 |
| ASD | 3.11 | 3.16029941  |
| ASD | 3.11 | 3.198023138 |
| ASD | 3.11 | 3.20527259  |
| ASD | 3.2  | 1.768679159 |
| ASD | 3.2  | 1.943362231 |
| ASD | 3.2  | 1.983581142 |
| ASD | 3.2  | 2.363642804 |
| ASD | 3.2  | 2.539922116 |
| ASD | 3.2  | 2.598746116 |
| ASD | 3.2  | 3.164256994 |
| ASD | 3.2  | 3.210737954 |
| ASD | 3.2  | 3.279339373 |
| ASD | 3.3  | 1.934280644 |
| ASD | 3.3  | 1.941640937 |
| ASD | 3.3  | 2.487486511 |
| ASD | 3.3  | 2.60935582  |
| ASD | 3.3  | 3.075803846 |
| ASD | 3.3  | 3.096434177 |
| ASD | 3.3  | 3.101869839 |
| ASD | 3.3  | 3.451008802 |
| ASD | 3.3  | 3.804556807 |
| ASD | 3.3  | 74.50746036 |
| ASD | 3.3  | 4.236998373 |
| ASD | 3.4  | 1.933723539 |
| ASD | 3.4  | 1.938343257 |
| ASD | 3.4  | 1.956556514 |
| ASD | 3.4  | 2.192294526 |
| ASD | 3.4  | 2.913807573 |
| ASD | 3.4  | 3.053603751 |
| ASD | 3.4  | 3.17858098  |
| ASD | 3.4  | 3.305120786 |
| ASD | 3.4  | 4.359049422 |
| ASD | 3.4  | 5.035086088 |
| ASD | 3.4  | 5.83902245  |
| ASD | 3.4  | 24.3037751  |
| ASD | NA   | NA          |
| ASD | 3.5  | 1.895846749 |
| ASD | 3.5  | 2.209360626 |
| ASD | 3.5  | 2.216254316 |
| ASD | 3.5  | 2.318769604 |

|  |      |              |
|--|------|--------------|
|  | 3    | 0.978447     |
|  | 3    | 0.988161299  |
|  | 3    | 0.991292279  |
|  | 3    | 1.103371965  |
|  | 3    | 1.116146116  |
|  | 3    | 1.346621749  |
|  | 3    | 1.373119065  |
|  | 3    | 1.761531517  |
|  | 3    | 2.448650149  |
|  | 3    | 3.09915103   |
|  | 3    | 18.82056966  |
|  | 3    | 41.17908341  |
|  | 3    | 41.56577085  |
|  | 3    | 0.977418466  |
|  | 3    | 0.137286796  |
|  | 3    | 0.389350478  |
|  | 3    | -0.175551771 |
|  | 3.1  | -0.388449805 |
|  | 3.1  | -0.381025991 |
|  | 3.1  | -0.225200085 |
|  | 3.1  | -0.202072231 |
|  | 3.1  | -0.164115019 |
|  | 3.1  | -0.124805704 |
|  | 3.1  | -0.07038204  |
|  | 3.1  | -0.06283947  |
|  | 3.1  | -0.041403571 |
|  | 3.1  | -0.019380766 |
|  | 3.1  | -0.007059922 |
|  | 3.1  | 0.070276094  |
|  | 3.1  | 0.132751542  |
|  | 3.1  | 0.190654828  |
|  | 3.1  | 0.313982726  |
|  | 3.1  | 0.346959565  |
|  | 3.1  | 0.591126903  |
|  | 3.1  | -0.376381152 |
|  | 3.11 | -0.163388533 |
|  | 3.11 | -0.05148801  |
|  | 3.11 | -0.041245519 |
|  | 3.11 | -0.039277197 |
|  | 3.11 | -0.429331318 |
|  | 3.2  | -0.381902553 |
|  | 3.2  | -0.370982586 |
|  | 3.2  | -0.267790817 |
|  | 3.2  | -0.219928652 |
|  | 3.2  | -0.203957158 |
|  | 3.2  | -0.050413474 |
|  | 3.2  | -0.037793278 |
|  | 3.2  | -0.019167086 |
|  | 3.2  | -0.384368324 |
|  | 3.3  | -0.382369907 |
|  | 3.3  | -0.234165613 |
|  | 3.3  | -0.201076483 |
|  | 3.3  | -0.074429674 |
|  | 3.3  | -0.068828266 |
|  | 3.3  | -0.067352412 |
|  | 3.3  | 0.027443435  |
|  | 3.3  | 0.123436396  |
|  | 3.3  | 19.32021001  |
|  | 3.3  | 0.240850001  |
|  | 3.3  | -0.384519585 |
|  | 3.4  | -0.383265271 |
|  | 3.4  | -0.37832013  |
|  | 3.4  | -0.314314142 |
|  | 3.4  | -0.118413805 |
|  | 3.4  | -0.080457293 |
|  | 3.4  | -0.046524322 |
|  | 3.4  | -0.012167091 |
|  | 3.4  | 0.273988476  |
|  | 3.4  | 0.457541374  |
|  | 3.4  | 0.675820731  |
|  | 3.4  | 5.689245338  |
|  | 3.4  | -0.909551106 |
|  | #N/A | -0.394803635 |

|     |     |             |
|-----|-----|-------------|
| ASD | 3.5 | 2.744250223 |
| ASD | 3.5 | 2.882668987 |
| ASD | 3.5 | 3.017441442 |
| ASD | 3.5 | 3.096684458 |
| ASD | 3.5 | 3.410058613 |
| ASD | 3.5 | 3.507703419 |
| ASD | 3.5 | 4.535534332 |
| ASD | 3.5 | 3.529253396 |
| ASD | 3.5 | 3.23655577  |
| ASD | 3.5 | 4.998632021 |
| ASD | 3.6 | 1.207454398 |
| ASD | 3.6 | 1.742759764 |
| ASD | 3.6 | 1.927048457 |
| ASD | 3.6 | 1.969323331 |
| ASD | 3.6 | 2.143323705 |
| ASD | 3.6 | 2.192883566 |
| ASD | 3.6 | 2.840810277 |
| ASD | 3.6 | 3.096037241 |
| ASD | 3.6 | 3.168660132 |
| ASD | 3.6 | 3.214450603 |
| ASD | 3.6 | 3.222052733 |
| ASD | 3.6 | 3.252706558 |
| ASD | 3.6 | 3.369225631 |
| ASD | 3.6 | 3.547595603 |
| ASD | 3.6 | 3.637206167 |
| ASD | 3.6 | 4.446765011 |
| ASD | 3.6 | 7.651386954 |
| ASD | 3.6 | 19.29436512 |
| ASD | 3.7 | 1.956541995 |
| ASD | 3.7 | 2.133283344 |
| ASD | 3.7 | 3.191617548 |
| ASD | 3.7 | 3.941842874 |
| ASD | 3.7 | 3.21015624  |
| ASD | 3.8 | 1.541628728 |
| ASD | 3.8 | 1.898962602 |
| ASD | 3.8 | 1.900327471 |
| ASD | 3.8 | 1.921673248 |
| ASD | 3.8 | 1.990897744 |
| ASD | 3.8 | 3.266606311 |
| ASD | 3.8 | 3.605452329 |
| ASD | 3.8 | 5.509052411 |
| ASD | 3.9 | 2.775393272 |
| ASD | 3.9 | 3.144986565 |
| ASD | 3.9 | 3.172212144 |
| ASD | 3.9 | 3.584215189 |
| ASD | 4   | 1.516799172 |
| ASD | 4   | 1.785683206 |
| ASD | 4   | 1.905511501 |
| ASD | 4   | 1.917625405 |
| ASD | 4   | 1.939374654 |
| ASD | 4   | 2.583980213 |
| ASD | 4   | 2.808818765 |
| ASD | 4   | 2.828250607 |
| ASD | 4   | 2.874990738 |
| ASD | 4   | 2.894112109 |
| ASD | 4   | 2.896783213 |
| ASD | 4   | 2.928880847 |
| ASD | 4   | 2.951404219 |
| ASD | 4   | 2.962363052 |
| ASD | 4   | 3.015745786 |
| ASD | 4   | 3.049568282 |
| ASD | 4   | 3.060910422 |
| ASD | 4   | 3.106395269 |
| ASD | 4   | 3.107602552 |
| ASD | 4   | 3.11622259  |
| ASD | 4   | 3.142433897 |
| ASD | 4   | 3.146042939 |
| ASD | 4   | 3.156012917 |
| ASD | 4   | 3.164336284 |
| ASD | 4   | 3.164406248 |
| ASD | 4   | 3.200357181 |
| ASD | 4   | 3.219918917 |
| ASD | 4   | 3.245195319 |

|     |              |
|-----|--------------|
| 3.5 | -0.30968047  |
| 3.5 | -0.307808742 |
| 3.5 | -0.279974485 |
| 3.5 | -0.164450868 |
| 3.5 | -0.126868343 |
| 3.5 | -0.090275839 |
| 3.5 | -0.068760311 |
| 3.5 | 0.016324917  |
| 3.5 | 0.042836774  |
| 3.5 | 0.321906463  |
| 3.5 | 0.048687878  |
| 3.5 | -0.0307834   |
| 3.5 | 0.447643612  |
| 3.5 | -0.581711264 |
| 3.6 | -0.436368776 |
| 3.6 | -0.386331958 |
| 3.6 | -0.374853771 |
| 3.6 | -0.327610367 |
| 3.6 | -0.314154209 |
| 3.6 | -0.138233536 |
| 3.6 | -0.068936039 |
| 3.6 | -0.049217964 |
| 3.6 | -0.036785245 |
| 3.6 | -0.034721166 |
| 3.6 | -0.026398247 |
| 3.6 | 0.005238223  |
| 3.6 | 0.053668029  |
| 3.6 | 0.077998483  |
| 3.6 | 0.297804418  |
| 3.6 | 1.167901669  |
| 3.6 | 4.329124262  |
| 3.6 | -0.378324072 |
| 3.7 | -0.330336458 |
| 3.7 | -0.042984721 |
| 3.7 | 0.160711379  |
| 3.7 | -0.037951222 |
| 3.7 | -0.490978513 |
| 3.8 | -0.393957639 |
| 3.8 | -0.393587059 |
| 3.8 | -0.387791398 |
| 3.8 | -0.368996032 |
| 3.8 | -0.02262428  |
| 3.8 | 0.069376896  |
| 3.8 | 0.5862295    |
| 3.8 | -0.155995118 |
| 3.9 | -0.05564565  |
| 3.9 | -0.048253546 |
| 3.9 | 0.063610732  |
| 3.9 | -0.497720066 |
| 4   | -0.245195548 |
| 4   | -0.231541839 |
| 4   | -0.230161533 |
| 4   | -0.227683337 |
| 4   | -0.154234435 |
| 4   | -0.128615442 |
| 4   | -0.126401301 |
| 4   | -0.121075546 |
| 4   | -0.118896782 |
| 4   | -0.118592425 |
| 4   | -0.114935094 |
| 4   | -0.112368692 |
| 4   | -0.11112     |
| 4   | -0.10503736  |
| 4   | -0.101183491 |
| 4   | -0.099891123 |
| 4   | -0.0947084   |
| 4   | -0.094570837 |
| 4   | -0.093588636 |
| 4   | -0.090602016 |
| 4   | -0.090190788 |
| 4   | -0.089054769 |
| 4   | -0.088106372 |
| 4   | -0.0880984   |

|     |      |             |
|-----|------|-------------|
| ASD | 4    | 3.268677026 |
| ASD | 4    | 3.271522795 |
| ASD | 4    | 3.446844121 |
| ASD | 4    | 3.454767068 |
| ASD | 4    | 3.48379157  |
| ASD | 4    | 3.485865047 |
| ASD | 4    | 3.502400422 |
| ASD | 4    | 3.505979883 |
| ASD | 4    | 3.50662005  |
| ASD | 4    | 3.508200266 |
| ASD | 4    | 3.509413673 |
| ASD | 4    | 3.539420615 |
| ASD | 4    | 3.604044499 |
| ASD | 4    | 3.656568636 |
| ASD | 4    | 3.695917457 |
| ASD | 4    | 3.69665372  |
| ASD | 4    | 3.736931543 |
| ASD | 4    | 3.748703736 |
| ASD | 4    | 3.762359505 |
| ASD | 4    | 3.854609633 |
| ASD | 4    | 3.857403626 |
| ASD | 4    | 3.866259649 |
| ASD | 4    | 3.884929354 |
| ASD | 4    | 3.8870907   |
| ASD | 4    | 3.894784801 |
| ASD | 4    | 3.90374767  |
| ASD | 4    | 3.904236823 |
| ASD | 4    | 3.941916704 |
| ASD | 4    | 3.948995286 |
| ASD | 4    | 3.968496449 |
| ASD | 4    | 4.006113527 |
| ASD | 4    | 4.03045939  |
| ASD | 4    | 4.052926006 |
| ASD | 4    | 4.260344084 |
| ASD | 4    | 4.392902141 |
| ASD | 4    | 4.545397326 |
| ASD | 4    | 7.449149512 |
| ASD | 4    | 32.46347539 |
| ASD | 4    | 38.89401951 |
| ASD | 4    | 74.95307332 |
| ASD | 4    | 2.538694282 |
| ASD | 4    | 6.536994144 |
| ASD | 4.1  | 1.914915159 |
| ASD | 4.1  | 2.416535323 |
| ASD | 4.1  | 2.717381167 |
| ASD | 4.1  | 3.12748412  |
| ASD | 4.1  | 3.303567752 |
| ASD | 4.1  | 3.507126704 |
| ASD | 4.1  | 3.509649523 |
| ASD | 4.1  | 3.926358763 |
| ASD | 4.1  | 4.442499019 |
| ASD | 4.1  | 4.939970364 |
| ASD | 4.11 | 2.425418807 |
| ASD | 4.11 | 4.34664516  |
| ASD | 4.2  | 2.592301545 |
| ASD | 4.2  | 3.159355867 |
| ASD | 4.2  | 3.642307254 |
| ASD | 4.2  | 38.81686877 |
| ASD | 4.3  | 3.442366431 |
| ASD | 4.3  | 4.622827423 |
| ASD | 4.3  | 4.633477966 |
| ASD | 4.4  | 1.967474488 |
| ASD | 4.4  | 2.856673934 |
| ASD | 4.4  | 3.035825385 |
| ASD | 4.4  | 3.193763485 |
| ASD | 4.4  | 3.238747026 |
| ASD | 4.4  | 3.541462297 |
| ASD | 4.4  | 6.683604158 |
| ASD | 4.5  | 1.953855654 |
| ASD | 4.5  | 2.871454683 |
| ASD | 4.5  | 3.148883569 |
| ASD | 4.5  | 3.163115123 |
| ASD | 4.5  | 3.563787892 |

|  |      |              |
|--|------|--------------|
|  | 4    | -0.084002009 |
|  | 4    | -0.081773067 |
|  | 4    | -0.078892974 |
|  | 4    | -0.076217376 |
|  | 4    | -0.075893118 |
|  | 4    | -0.055916313 |
|  | 4    | -0.055013542 |
|  | 4    | -0.051706375 |
|  | 4    | -0.051470115 |
|  | 4    | -0.049586009 |
|  | 4    | -0.049178151 |
|  | 4    | -0.049105208 |
|  | 4    | -0.048925152 |
|  | 4    | -0.048786892 |
|  | 4    | -0.045367782 |
|  | 4    | -0.038004282 |
|  | 4    | -0.032019474 |
|  | 4    | -0.027535914 |
|  | 4    | -0.027452021 |
|  | 4    | -0.022862607 |
|  | 4    | -0.021521237 |
|  | 4    | -0.019965245 |
|  | 4    | -0.009453901 |
|  | 4    | -0.009135542 |
|  | 4    | -0.008126452 |
|  | 4    | -0.005999152 |
|  | 4    | -0.00575288  |
|  | 4    | -0.004876183 |
|  | 4    | -0.003854919 |
|  | 4    | -0.003799183 |
|  | 4    | 0.000494212  |
|  | 4    | 0.001300773  |
|  | 4    | 0.003522813  |
|  | 4    | 0.007809051  |
|  | 4    | 0.010583115  |
|  | 4    | 0.01314305   |
|  | 4    | 0.036777085  |
|  | 4    | 0.051881273  |
|  | 4    | 0.069257177  |
|  | 4    | 0.400122168  |
|  | 4    | 3.250353239  |
|  | 4    | 3.983074831  |
|  | 4    | 8.091785818  |
|  | 4    | -0.159394492 |
|  | 4    | 0.296187583  |
|  | 4    | -0.230470349 |
|  | 4.1  | -0.173313767 |
|  | 4.1  | -0.139034203 |
|  | 4.1  | -0.092305453 |
|  | 4.1  | -0.072241789 |
|  | 4.1  | -0.049047478 |
|  | 4.1  | -0.048760018 |
|  | 4.1  | -0.001278522 |
|  | 4.1  | 0.057532537  |
|  | 4.1  | 0.114216387  |
|  | 4.1  | -0.172301547 |
|  | 4.11 | 0.04661057   |
|  | 4.11 | -0.153286269 |
|  | 4.2  | -0.08867386  |
|  | 4.2  | -0.033644472 |
|  | 4.2  | 3.97428397   |
|  | 4.2  | -0.056426519 |
|  | 4.3  | 0.078079868  |
|  | 4.3  | 0.079293433  |
|  | 4.3  | -0.224481531 |
|  | 4.4  | -0.123162635 |
|  | 4.4  | -0.102749411 |
|  | 4.4  | -0.084753321 |
|  | 4.4  | -0.079627718 |
|  | 4.4  | -0.045135145 |
|  | 4.4  | 0.312892907  |
|  | 4.4  | -0.226033315 |
|  | 4.5  | -0.121478458 |

|     |     |             |
|-----|-----|-------------|
| ASD | 4.5 | 3.877853287 |
| ASD | 4.5 | 35.44180349 |
| ASD | 4.6 | 1.77914161  |
| ASD | 4.6 | 1.91777999  |
| ASD | 4.6 | 2.246008078 |
| ASD | 4.6 | 2.253682405 |
| ASD | 4.6 | 2.571636227 |
| ASD | 4.6 | 2.894389207 |
| ASD | 4.6 | 3.171074902 |
| ASD | 4.6 | 3.197841793 |
| ASD | 4.6 | 3.421052873 |
| ASD | 4.6 | 3.881919153 |
| ASD | 4.6 | 3.921649419 |
| ASD | 4.6 | 4.434641946 |
| ASD | 4.6 | 4.560724522 |
| ASD | 4.6 | 5.446421772 |
| ASD | 4.7 | 2.76586097  |
| ASD | 4.7 | 3.171948458 |
| ASD | 4.7 | 3.514299815 |
| ASD | 4.7 | 4.004544917 |
| ASD | 4.7 | 4.312426208 |
| ASD | 4.7 | 4.43252312  |
| ASD | 4.8 | 1.947499474 |
| ASD | 4.8 | 2.928194181 |
| ASD | 4.8 | 3.008897624 |
| ASD | 4.8 | 3.154879858 |
| ASD | 4.8 | 35.83761821 |
| ASD | 4.8 | 60.78189105 |
| ASD | 4.9 | 3.175334796 |
| ASD | 4.9 | 3.205025991 |
| ASD | 4.9 | 3.224372069 |
| ASD | 4.9 | 3.610643335 |
| ASD | 4.9 | 35.86581601 |
| ASD | 5   | 0.596219535 |
| ASD | 5   | 1.896391166 |
| ASD | 5   | 1.959437666 |
| ASD | 5   | 1.976318541 |
| ASD | 5   | 2.462145201 |
| ASD | 5   | 2.794508055 |
| ASD | 5   | 2.864472002 |
| ASD | 5   | 2.934937802 |
| ASD | 5   | 3.020900927 |
| ASD | 5   | 3.059915929 |
| ASD | 5   | 3.105404913 |
| ASD | 5   | 3.110157284 |
| ASD | 5   | 3.112182448 |
| ASD | 5   | 3.127294486 |
| ASD | 5   | 3.148039671 |
| ASD | 5   | 3.151270529 |
| ASD | 5   | 3.16173743  |
| ASD | 5   | 3.182378302 |
| ASD | 5   | 3.261124248 |
| ASD | 5   | 3.29382733  |
| ASD | 5   | 3.399293979 |
| ASD | 5   | 3.441914275 |
| ASD | 5   | 3.49941154  |
| ASD | 5   | 3.506688283 |
| ASD | 5   | 3.515329895 |
| ASD | 5   | 3.547691601 |
| ASD | 5   | 3.549632244 |
| ASD | 5   | 3.572612897 |
| ASD | 5   | 3.595689168 |
| ASD | 5   | 3.779197025 |
| ASD | 5   | 3.818177784 |
| ASD | 5   | 3.819973599 |
| ASD | 5   | 3.862152868 |
| ASD | 5   | 3.883641124 |
| ASD | 5   | 3.91473145  |
| ASD | 5   | 3.925294448 |
| ASD | 5   | 3.942685591 |
| ASD | 5   | 3.942725362 |
| ASD | 5   | 3.951369087 |
| ASD | 5   | 3.978396073 |

|     |              |
|-----|--------------|
| 4.5 | -0.089867115 |
| 4.5 | -0.088245516 |
| 4.5 | -0.042591278 |
| 4.5 | -0.006805427 |
| 4.5 | 3.589715704  |
| 4.5 | -0.245940923 |
| 4.6 | -0.230143919 |
| 4.6 | -0.192744314 |
| 4.6 | -0.191869871 |
| 4.6 | -0.155640957 |
| 4.6 | -0.118865208 |
| 4.6 | -0.087338547 |
| 4.6 | -0.084288622 |
| 4.6 | -0.05885507  |
| 4.6 | -0.006342146 |
| 4.6 | -0.001815123 |
| 4.6 | 0.056637272  |
| 4.6 | 0.071003618  |
| 4.6 | 0.17192346   |
| 4.6 | -0.133510223 |
| 4.7 | -0.087239011 |
| 4.7 | -0.048230145 |
| 4.7 | 0.007630318  |
| 4.7 | 0.042711528  |
| 4.7 | 0.056395844  |
| 4.7 | -0.226757563 |
| 4.8 | -0.115013336 |
| 4.8 | -0.105817667 |
| 4.8 | -0.089183874 |
| 4.8 | 3.634816396  |
| 4.8 | 6.477065348  |
| 4.8 | -0.086853158 |
| 4.9 | -0.083470026 |
| 4.9 | -0.081265658 |
| 4.9 | -0.037252384 |
| 4.9 | 3.638029365  |
| 4.9 | -0.380727736 |
| 5   | -0.169602923 |
| 5   | -0.165298632 |
| 5   | -0.164146146 |
| 5   | -0.130977943 |
| 5   | -0.108286971 |
| 5   | -0.103510415 |
| 5   | -0.098699596 |
| 5   | -0.092830749 |
| 5   | -0.090167129 |
| 5   | -0.08706152  |
| 5   | -0.086737067 |
| 5   | -0.086598806 |
| 5   | -0.085567082 |
| 5   | -0.084150773 |
| 5   | -0.083930197 |
| 5   | -0.083215604 |
| 5   | -0.081806417 |
| 5   | -0.076430298 |
| 5   | -0.074197604 |
| 5   | -0.066997218 |
| 5   | -0.064087459 |
| 5   | -0.060162024 |
| 5   | -0.059665228 |
| 5   | -0.059075251 |
| 5   | -0.056865863 |
| 5   | -0.056733372 |
| 5   | -0.055164444 |
| 5   | -0.053588988 |
| 5   | -0.041060598 |
| 5   | -0.038399316 |
| 5   | -0.038276713 |
| 5   | -0.035397063 |
| 5   | -0.033930024 |
| 5   | -0.031807435 |
| 5   | -0.031086281 |
| 5   | -0.029898958 |

|     |      |             |
|-----|------|-------------|
| ASD | 5    | 3.980449515 |
| ASD | 5    | 3.990521366 |
| ASD | 5    | 4.062746077 |
| ASD | 5    | 4.09104081  |
| ASD | 5    | 4.097595106 |
| ASD | 5    | 4.098930165 |
| ASD | 5    | 4.128283643 |
| ASD | 5    | 4.209646052 |
| ASD | 5    | 4.226430792 |
| ASD | 5    | 4.303735446 |
| ASD | 5    | 4.311478042 |
| ASD | 5    | 4.323371089 |
| ASD | 5    | 4.34148578  |
| ASD | 5    | 4.435156751 |
| ASD | 5    | 4.572449972 |
| ASD | 5    | 4.644733569 |
| ASD | 5    | 4.800262349 |
| ASD | 5    | 5.299074806 |
| ASD | 5    | 5.336832233 |
| ASD | 5    | 5.904067911 |
| ASD | 5    | 6.247313172 |
| ASD | 5    | 6.31383267  |
| ASD | 5    | 7.30005601  |
| ASD | 5    | 7.486531168 |
| ASD | 5    | 8.391948432 |
| ASD | 5    | 12.13523977 |
| ASD | 5    | 49.77907686 |
| ASD | 5    | NA          |
| ASD | 5.1  | 2.277648889 |
| ASD | 5.1  | 3.154331213 |
| ASD | 5.1  | 3.284288518 |
| ASD | 5.1  | 3.502208806 |
| ASD | 5.1  | 3.544946338 |
| ASD | 5.1  | 3.680441208 |
| ASD | 5.1  | 3.849203546 |
| ASD | 5.1  | 4.329762376 |
| ASD | 5.1  | 4.424795695 |
| ASD | 5.11 | 35.78969413 |
| ASD | 5.2  | 3.161723479 |
| ASD | 5.3  | 2.553816865 |
| ASD | 5.3  | 3.158974039 |
| ASD | 5.4  | 2.311897707 |
| ASD | 5.4  | 3.086706186 |
| ASD | 5.4  | 3.113725136 |
| ASD | 5.4  | 3.139439464 |
| ASD | 5.4  | 3.139442416 |
| ASD | 5.4  | 3.164240228 |
| ASD | 5.4  | 3.253584368 |
| ASD | 5.4  | 3.72447975  |
| ASD | 5.4  | 3.843385013 |
| ASD | 5.5  | 1.937405529 |
| ASD | 5.5  | 2.392122697 |
| ASD | 5.5  | 3.419012802 |
| ASD | 5.5  | 3.699880744 |
| ASD | 5.5  | 3.846176017 |
| ASD | 5.5  | 3.877681047 |
| ASD | 5.5  | 3.970955503 |
| ASD | 5.5  | 4.364505416 |
| ASD | 5.5  | 81.12677535 |
| ASD | 5.6  | 2.819520302 |
| ASD | 5.6  | 3.06161274  |
| ASD | 5.6  | 3.089442243 |
| ASD | 5.6  | 3.722578831 |
| ASD | 5.6  | 3.824743139 |
| ASD | 5.6  | 6.217986375 |
| ASD | 5.6  | 49.19357181 |
| ASD | 5.6  | 3.750129384 |
| ASD | 5.7  | 3.313765906 |
| ASD | 5.7  | 6.114021167 |
| ASD | 5.7  | 6.445977204 |
| ASD | 5.7  | 47.91228205 |
| ASD | 5.8  | 1.989875685 |
| ASD | 5.8  | 4.503350218 |

|      |              |
|------|--------------|
| 5    | -0.029896243 |
| 5    | -0.029306122 |
| 5    | -0.027460944 |
| 5    | -0.027320752 |
| 5    | -0.02663313  |
| 5    | -0.021702227 |
| 5    | -0.019770498 |
| 5    | -0.019323025 |
| 5    | -0.019231878 |
| 5    | -0.017227867 |
| 5    | -0.011673118 |
| 5    | -0.010527196 |
| 5    | -0.005249477 |
| 5    | -0.004720877 |
| 5    | -0.003908919 |
| 5    | -0.002672198 |
| 5    | 0.003722877  |
| 5    | 0.013096116  |
| 5    | 0.018031039  |
| 5    | 0.02864925   |
| 5    | 0.062704016  |
| 5    | 0.065281779  |
| 5    | 0.104007914  |
| 5    | 0.127441845  |
| 5    | 0.131983243  |
| 5    | 0.199314371  |
| 5    | 0.212045344  |
| 5    | 0.273859704  |
| 5    | 0.529420503  |
| 5    | 3.099428618  |
| 5    | -0.299072739 |
| 5    | -0.143573816 |
| 5.1  | -0.083721239 |
| 5.1  | -0.074848835 |
| 5.1  | -0.05997105  |
| 5.1  | -0.057053287 |
| 5.1  | -0.047802824 |
| 5.1  | -0.036281135 |
| 5.1  | -0.003472575 |
| 5.1  | 0.00301551   |
| 5.1  | 2.144349914  |
| 5.11 | -0.083216556 |
| 5.2  | -0.124719364 |
| 5.3  | -0.083404265 |
| 5.3  | -0.141235592 |
| 5.4  | -0.088338113 |
| 5.4  | -0.086493484 |
| 5.4  | -0.084737923 |
| 5.4  | -0.084737722 |
| 5.4  | -0.083044734 |
| 5.4  | -0.076945059 |
| 5.4  | -0.044796238 |
| 5.4  | -0.036678376 |
| 5.4  | -0.166802803 |
| 5.5  | -0.135758497 |
| 5.5  | -0.065650981 |
| 5.5  | -0.046475654 |
| 5.5  | -0.036487829 |
| 5.5  | -0.034336928 |
| 5.5  | -0.027968924 |
| 5.5  | -0.001100609 |
| 5.5  | 5.239588754  |
| 5.5  | -0.106579343 |
| 5.6  | -0.090051285 |
| 5.6  | -0.088151318 |
| 5.6  | -0.044926017 |
| 5.6  | -0.037951088 |
| 5.6  | 0.125439656  |
| 5.6  | 3.059455203  |
| 5.6  | -0.043045095 |
| 5.6  | -0.072836364 |
| 5.7  | 0.118341776  |
| 5.7  | 0.141004973  |

|     |     |             |
|-----|-----|-------------|
| ASD | 5.8 | 5.495925978 |
| ASD | 5.8 | 7.350306138 |
| ASD | 5.9 | 3.159007073 |
| ASD | 5.9 | 3.928064749 |
| ASD | 5.9 | 4.310695518 |
| ASD | 5.9 | 4.412568244 |
| ASD | 5.9 | 35.36158295 |
| ASD | 5.9 | 6.759678058 |
| ASD | 6   | 2.666106919 |
| ASD | 6   | 3.295334597 |
| ASD | 6   | 3.406344498 |
| ASD | 6   | 3.483469223 |
| ASD | 6   | 3.504049088 |
| ASD | 6   | 3.618499752 |
| ASD | 6   | 3.761570923 |
| ASD | 6   | 3.885215511 |
| ASD | 6   | 3.896482309 |
| ASD | 6   | 3.929361929 |
| ASD | 6   | 3.93688859  |
| ASD | 6   | 3.998605189 |
| ASD | 6   | 4.025840682 |
| ASD | 6   | 4.096265741 |
| ASD | 6   | 4.139033319 |
| ASD | 6   | 4.489461645 |
| ASD | 6   | 5.153894208 |
| ASD | 6   | 5.351578996 |
| ASD | 6   | 5.376237735 |
| ASD | 6   | 5.663571469 |
| ASD | 6   | 6.056527048 |
| ASD | 6   | 6.279743552 |
| ASD | 6   | 6.448335245 |
| ASD | 6   | 6.559986666 |
| ASD | 6   | 6.561354175 |
| ASD | 6   | 6.580830999 |
| ASD | 6   | 8.503086552 |
| ASD | 6   | 27.32293703 |
| ASD | 6   | 35.29367074 |
| ASD | 6   | 62.97000766 |
| ASD | 6   | 4.360557438 |
| ASD | 6   | 4.590533386 |
| ASD | 6.1 | 4.104420053 |
| ASD | 6.1 | 5.441069648 |
| ASD | 6.1 | 7.361217931 |
| ASD | 6.2 | 3.49537467  |
| ASD | 6.3 | 1.888797564 |
| ASD | 6.4 | 3.490909865 |
| ASD | 6.4 | 3.513936023 |
| ASD | 6.4 | 3.982458219 |
| ASD | 6.4 | 7.312564574 |
| ASD | 6.4 | 34.53119898 |
| ASD | 6.5 | 1.935325183 |
| ASD | 6.5 | 2.544073701 |
| ASD | 6.5 | 3.831359513 |
| ASD | 6.5 | 4.40434619  |
| ASD | 6.5 | 4.788232304 |
| ASD | 6.5 | 5.448442876 |
| ASD | 6.5 | 6.052291706 |
| ASD | 6.5 | 6.582149733 |
| ASD | 6.5 | 10.87918557 |
| ASD | 6.5 | 4.580985444 |
| ASD | 6.6 | 2.70633251  |
| ASD | 6.6 | 2.833821597 |
| ASD | 6.6 | 3.849587917 |
| ASD | 6.6 | 4.174854231 |
| ASD | 6.6 | 5.338114798 |
| ASD | 6.6 | 6.789393798 |
| ASD | 6.6 | 4.803423069 |
| ASD | 6.7 | 2.949096226 |
| ASD | 6.7 | 3.165363801 |
| ASD | 6.8 | 3.278596972 |
| ASD | 6.8 | 7.336787656 |
| ASD | 6.9 | 2.789810923 |
| ASD | 6.9 | 3.883492303 |

|     |              |
|-----|--------------|
| 5.7 | 2.971979394  |
| 5.7 | -0.163220577 |
| 5.8 | 0.008378559  |
| 5.8 | 0.076143377  |
| 5.8 | 0.202745031  |
| 5.8 | -0.08340201  |
| 5.9 | -0.030897148 |
| 5.9 | -0.004774301 |
| 5.9 | 0.002180721  |
| 5.9 | 2.115122044  |
| 5.9 | 0.162421858  |
| 5.9 | -0.117053133 |
| 6   | -0.168953511 |
| 6   | -0.16246795  |
| 6   | -0.157962072 |
| 6   | -0.156759729 |
| 6   | -0.150073148 |
| 6   | -0.141714463 |
| 6   | -0.134490743 |
| 6   | -0.133832499 |
| 6   | -0.131911565 |
| 6   | -0.131471833 |
| 6   | -0.127866147 |
| 6   | -0.126274961 |
| 6   | -0.122160499 |
| 6   | -0.119661878 |
| 6   | -0.099188711 |
| 6   | -0.060370391 |
| 6   | -0.048821001 |
| 6   | -0.047380357 |
| 6   | -0.030593382 |
| 6   | -0.007635634 |
| 6   | 0.005405403  |
| 6   | 0.01525508   |
| 6   | 0.02177812   |
| 6   | 0.021858015  |
| 6   | 0.022995914  |
| 6   | 0.135300359  |
| 6   | 1.234817461  |
| 6   | 1.700493746  |
| 6   | 3.317435698  |
| 6   | -0.106719715 |
| 6   | -0.09328377  |
| 6   | -0.121684098 |
| 6.1 | -0.043592665 |
| 6.1 | 0.068588666  |
| 6.1 | -0.157266517 |
| 6.2 | -0.251127996 |
| 6.3 | -0.157527366 |
| 6.4 | -0.156182102 |
| 6.4 | -0.128809506 |
| 6.4 | 0.065746178  |
| 6.4 | 1.655947656  |
| 6.4 | -0.248409701 |
| 6.5 | -0.212844625 |
| 6.5 | -0.137637186 |
| 6.5 | -0.104161434 |
| 6.5 | -0.081733554 |
| 6.5 | -0.043161897 |
| 6.5 | -0.007883077 |
| 6.5 | 0.023072959  |
| 6.5 | 0.27411982   |
| 6.5 | -0.093841592 |
| 6.5 | -0.203364936 |
| 6.6 | -0.195916607 |
| 6.6 | -0.136572223 |
| 6.6 | -0.117569103 |
| 6.6 | -0.049607623 |
| 6.6 | 0.035180834  |
| 6.6 | -0.080846059 |
| 6.6 | -0.189181887 |
| 6.7 | -0.176546829 |
| 6.7 | -0.169931378 |

|     |     |             |
|-----|-----|-------------|
| ASD | 6.9 | 5.723994717 |
| ASD | 7   | 2.357432785 |
| ASD | 7   | 2.59132726  |
| ASD | 7   | 2.634127165 |
| ASD | 7   | 3.153278609 |
| ASD | 7   | 3.222452899 |
| ASD | 7   | 3.412128066 |
| ASD | 7   | 3.508745379 |
| ASD | 7   | 3.597351534 |
| ASD | 7   | 3.604812299 |
| ASD | 7   | 3.746512202 |
| ASD | 7   | 3.796403522 |
| ASD | 7   | 3.865268305 |
| ASD | 7   | 3.914408433 |
| ASD | 7   | 3.955667203 |
| ASD | 7   | 4.271622131 |
| ASD | 7   | 4.425494281 |
| ASD | 7   | 4.494372775 |
| ASD | 7   | 4.541691254 |
| ASD | 7   | 4.798957611 |
| ASD | 7   | 5.303493954 |
| ASD | 7   | 6.446539387 |
| ASD | 7   | 6.485826135 |
| ASD | 7   | 7.480051592 |
| ASD | 7   | 26.49278743 |
| ASD | 7   | 27.26330227 |
| ASD | 7   | 27.30473237 |
| ASD | 7   | 35.51019672 |
| ASD | 7   | 46.31172495 |
| ASD | 7   | 47.12925687 |
| ASD | 7   | 47.37459511 |
| ASD | 7   | 74.16103107 |
| ASD | 7   | 3.388650594 |
| ASD | 7.1 | 2.483420178 |
| ASD | 7.1 | 3.016962749 |
| ASD | 7.3 | 3.886542529 |
| ASD | 7.5 | 2.591688069 |
| ASD | 7.6 | 3.800559998 |
| ASD | 7.6 | 29.30662249 |
| ASD | 7.7 | 1.946405071 |
| ASD | 7.8 | 2.305071823 |
| ASD | 8   | 2.932530666 |
| ASD | 8   | 3.110017026 |
| ASD | 8   | 3.134013449 |
| ASD | 8   | 3.161605693 |
| ASD | 8   | 3.323140162 |
| ASD | 8   | 3.534150253 |
| ASD | 8   | 3.795128401 |
| ASD | 8   | 3.883004325 |
| ASD | 8   | 3.895459721 |
| ASD | 8   | 4.020820066 |
| ASD | 8   | 4.33892372  |
| ASD | 8   | 5.383623749 |
| ASD | 8   | 5.603725523 |
| ASD | 8   | 5.776427031 |
| ASD | 8   | 6.317129835 |
| ASD | 8   | 6.593434297 |
| ASD | 8   | 6.747454517 |
| ASD | 8   | 7.308318518 |
| ASD | 8   | 7.401654691 |
| ASD | 8   | 7.420372799 |
| ASD | 8   | 7.429260261 |
| ASD | 8   | 46.80186197 |
| ASD | 8   | 5.831308082 |
| ASD | 8.1 | 7.6725621   |
| ASD | 8.6 | 7.624448828 |
| ASD | 8.7 | 6.461969227 |
| ASD | 8.8 | 8.380741477 |
| ASD | 8.9 | 3.395127853 |
| ASD | 8.9 | 3.85793594  |
| ASD | 9   | 2.317607616 |
| ASD | 9   | 2.318238246 |
| ASD | 9   | 2.757757857 |

|     |              |
|-----|--------------|
| 6.8 | 0.06716137   |
| 6.8 | -0.198487855 |
| 6.9 | -0.134591418 |
| 6.9 | -0.027063259 |
| 6.9 | -0.223748797 |
| 7   | -0.197323267 |
| 7   | -0.194979307 |
| 7   | -0.166547692 |
| 7   | -0.162759324 |
| 7   | -0.152371659 |
| 7   | -0.147080359 |
| 7   | -0.142227794 |
| 7   | -0.141819201 |
| 7   | -0.134058928 |
| 7   | -0.131326602 |
| 7   | -0.127555184 |
| 7   | -0.124863998 |
| 7   | -0.122604439 |
| 7   | -0.105300993 |
| 7   | -0.0968741   |
| 7   | -0.093101931 |
| 7   | -0.090510509 |
| 7   | -0.076421175 |
| 7   | -0.048789964 |
| 7   | 0.013809549  |
| 7   | 0.015961109  |
| 7   | 0.070410414  |
| 7   | 1.111653369  |
| 7   | 1.153851038  |
| 7   | 1.156119981  |
| 7   | 1.605496757  |
| 7   | 2.197048402  |
| 7   | 2.241820989  |
| 7   | 2.255257072  |
| 7   | 3.722230997  |
| 7   | -0.153657416 |
| 7   | -0.203232858 |
| 7.1 | -0.174013105 |
| 7.1 | -0.126390089 |
| 7.3 | -0.197303507 |
| 7.5 | -0.13109897  |
| 7.6 | 1.265754596  |
| 7.6 | -0.232642786 |
| 7.7 | -0.213000204 |
| 7.8 | -0.178637075 |
| 8   | -0.264288873 |
| 8   | -0.254225741 |
| 8   | -0.25286519  |
| 8   | -0.251300763 |
| 8   | -0.242142073 |
| 8   | -0.230178211 |
| 8   | -0.215381257 |
| 8   | -0.210398862 |
| 8   | -0.209692666 |
| 8   | -0.202584978 |
| 8   | -0.184549118 |
| 8   | -0.125316656 |
| 8   | -0.112837313 |
| 8   | -0.103045473 |
| 8   | -0.072388675 |
| 8   | -0.056722748 |
| 8   | -0.047990101 |
| 8   | -0.016190202 |
| 8   | -0.010898222 |
| 8   | -0.009836942 |
| 8   | -0.00933304  |
| 8   | 2.22301699   |
| 8   | -0.099933824 |
| 8.1 | 0.004461702  |
| 8.6 | 0.001733773  |
| 8.7 | -0.064176563 |
| 8.8 | 0.044614097  |
| 8.9 | -0.238060511 |

|     |      |             |
|-----|------|-------------|
| ASD | 9    | 3.123784629 |
| ASD | 9    | 3.191205179 |
| ASD | 9    | 5.328972004 |
| ASD | 9    | 6.125345238 |
| ASD | 9    | 6.467657387 |
| ASD | 9    | 7.276952792 |
| ASD | 9    | 8.375038236 |
| ASD | 9    | 14.82855893 |
| ASD | 9    | 38.56855634 |
| ASD | 9    | 74.35987823 |
| ASD | 9    | 4.524931417 |
| ASD | 9.3  | 2.814870832 |
| ASD | 9.4  | 7.304087304 |
| ASD | 9.5  | 38.83830565 |
| ASD | 9.6  | 4.318045379 |
| ASD | 9.6  | 5.624045253 |
| ASD | 9.6  | 38.40106647 |
| ASD | 9.6  | 62.7889812  |
| ASD | 10   | 3.507261311 |
| ASD | 10   | 6.594135011 |
| ASD | 10   | 6.762039259 |
| ASD | 10   | 7.477493897 |
| ASD | 10   | 7.599466667 |
| ASD | 10   | 8.386173576 |
| ASD | 10   | 35.76497811 |
| ASD | 10   | 6.154322714 |
| ASD | 10.2 | 7.191490546 |
| ASD | 10.4 | 6.817935564 |
| ASD | 11   | 6.155717835 |
| ASD | 11   | 8.478001133 |
| ASD | 11   | 8.512100264 |
| ASD | 11   | 8.716706671 |
| ASD | 11   | 31.56978476 |
| ASD | 11   | 35.38261884 |
| ASD | 11.5 | 38.67202818 |
| ASD | 11.6 | 8.566768542 |
| ASD | 12   | 4.303707215 |
| ASD | 12   | 7.078332018 |
| ASD | 12   | 8.509371944 |
| ASD | 12   | 8.610645778 |
| ASD | 13   | 4.290428899 |
| ASD | 13   | 7.499890968 |
| ASD | 14   | 7.409953676 |
| ASD | 14   | 52.32369453 |
| ASD | 14   | 54.19111691 |
| ASD | 17   | 35.14317583 |
| ASD | 18   | 47.94773459 |
| ASD | 19   | 7.353418484 |
| NT  | 0.11 | 0.533876112 |
| NT  | 1    | 1.244406305 |
| NT  | 1    | 1.785678762 |
| NT  | 1    | 68.48959386 |
| NT  | 1.1  | 1.904358452 |
| NT  | 1.1  | 1.926215641 |
| NT  | 1.1  | 2.723521588 |
| NT  | 1.2  | 0.437254446 |
| NT  | 1.2  | 1.609050579 |
| NT  | 1.3  | 0.875468793 |
| NT  | 1.3  | 1.764913468 |
| NT  | 1.3  | 4.383914265 |
| NT  | 1.3  | 4.73428875  |
| NT  | 1.5  | 1.773930851 |
| NT  | 1.5  | 3.021694126 |
| NT  | 1.6  | 0.225241531 |
| NT  | 1.7  | 2.558296738 |
| NT  | 1.8  | 1.940088158 |
| NT  | 1.8  | 2.69417618  |
| NT  | 2    | 1.802291752 |
| NT  | 2    | 1.916475321 |
| NT  | 2    | 1.927718431 |
| NT  | 2    | 1.930603539 |
| NT  | 2    | 1.968570376 |
| NT  | 2    | 2.00462387  |

|      |              |
|------|--------------|
| 8.9  | -0.211820191 |
| 9    | -0.280818353 |
| 9    | -0.280779015 |
| 9    | -0.253362222 |
| 9    | -0.23052984  |
| 9    | -0.226324214 |
| 9    | -0.092972465 |
| 9    | -0.043295502 |
| 9    | -0.021942414 |
| 9    | 0.028540621  |
| 9    | 0.097038089  |
| 9    | 0.499602231  |
| 9    | 1.980479437  |
| 9    | -0.425388389 |
| 9    | -0.14312771  |
| 9.3  | -0.249799572 |
| 9.4  | 0.030233244  |
| 9.5  | 1.997306129  |
| 9.6  | -0.156033053 |
| 9.6  | -0.074566092 |
| 9.6  | 1.970031587  |
| 9.6  | -0.425388389 |
| 10   | -1.689564916 |
| 10   | -0.477611201 |
| 10   | -0.411689431 |
| 10   | -0.130791024 |
| 10   | -0.082902653 |
| 10   | 0.225970483  |
| 10   | 10.9753069   |
| 10   | -0.65028822  |
| 10.2 | -0.243080303 |
| 10.4 | -0.389743689 |
| 11   | -0.722724981 |
| 11   | -0.550788057 |
| 11   | -0.54826343  |
| 11   | -0.533114806 |
| 11   | 1.15887857   |
| 11   | 1.44117271   |
| 11.5 | 1.684713593  |
| 11.6 | -0.544215907 |
| 12   | -0.719308467 |
| 12   | -0.497932284 |
| 12   | -0.383755349 |
| 12   | -0.375675116 |
| 13   | -0.72036789  |
| 13   | -0.464297787 |
| 14   | -0.471473523 |
| 14   | 3.112013683  |
| 14   | 3.261007824  |
| 17   | 1.741249018  |
| 18   | 2.762873395  |
| 19   | -0.475984239 |



|    |      |             |
|----|------|-------------|
| NT | 2    | 2.894188968 |
| NT | 2    | 3.011604701 |
| NT | 2    | 3.09348605  |
| NT | 2    | 3.370727229 |
| NT | 2    | 3.573430667 |
| NT | 2    | 3.640511612 |
| NT | 2    | 3.794523823 |
| NT | 2    | 3.926908401 |
| NT | 2    | 4.539290752 |
| NT | 2    | 38.91952638 |
| NT | 2.1  | 2.123642879 |
| NT | 2.1  | 2.450220386 |
| NT | 2.1  | 4.48688387  |
| NT | 2.11 | 3.083688531 |
| NT | 2.11 | 4.485241542 |
| NT | 2.2  | 1.773548738 |
| NT | 2.2  | 6.747663416 |
| NT | 2.3  | 1.898999795 |
| NT | 2.3  | 3.575206026 |
| NT | 2.4  | 3.595334729 |
| NT | 2.5  | 1.947471468 |
| NT | 2.5  | 3.116107379 |
| NT | 2.6  | 2.856290688 |
| NT | 2.7  | 2.171690062 |
| NT | 2.7  | 2.234890908 |
| NT | 2.8  | 2.926979552 |
| NT | 2.8  | 2.956886945 |
| NT | 2.8  | 3.96726386  |
| NT | 2.9  | 1.939770175 |
| NT | 2.9  | 2.120537216 |
| NT | 2.9  | 3.465408541 |
| NT | 2.9  | 3.774797305 |
| NT | 2.9  | 3.95020403  |
| NT | 2.9  | 6.450540684 |
| NT | 3    | 0.377826796 |
| NT | 3    | 1.824284114 |
| NT | 3    | 1.961698974 |
| NT | 3    | 2.137636724 |
| NT | 3    | 2.492011984 |
| NT | 3    | 2.572670693 |
| NT | 3    | 2.769971304 |
| NT | 3    | 3.098932323 |
| NT | 3    | 3.15361811  |
| NT | 3    | 3.167651931 |
| NT | 3    | 3.236924353 |
| NT | 3    | 3.261732787 |
| NT | 3    | 3.301943511 |
| NT | 3    | 3.640047714 |
| NT | 3    | 3.691994583 |
| NT | 3    | 3.769852338 |
| NT | 3    | 3.877041072 |
| NT | 3    | 3.96430516  |
| NT | 3    | 4.263707514 |
| NT | 3    | 4.280934647 |
| NT | 3    | 4.319455935 |
| NT | 3    | 4.352751109 |
| NT | 3    | 4.395606078 |
| NT | 3    | 4.515759575 |
| NT | 3    | 4.904170632 |
| NT | 3    | 5.252478488 |
| NT | 3    | 5.546847984 |
| NT | 3    | 5.776309565 |
| NT | 3    | 6.566344306 |
| NT | 3    | 6.60513629  |
| NT | 3    | 6.795485713 |
| NT | 3    | 6.949182436 |
| NT | 3    | 8.423214816 |
| NT | 3    | 11.76847551 |
| NT | 3    | 74.8685423  |
| NT | 3    | 1.948320635 |
| NT | 3    | 3.587889103 |
| NT | 3.1  | 1.245208373 |
| NT | 3.1  | 1.933497847 |

|    |      |             |
|----|------|-------------|
| NT | 3.1  | 2.331238031 |
| NT | 3.1  | 3.349932934 |
| NT | 3.1  | 4.492395793 |
| NT | 3.11 | 4.002659778 |
| NT | 3.11 | 62.6083836  |
| NT | 3.2  | 2.2017919   |
| NT | 3.2  | 3.542524228 |
| NT | 3.2  | 6.327465698 |
| NT | 3.3  | 3.354333599 |
| NT | 3.3  | 3.737872988 |
| NT | 3.4  | 2.191095663 |
| NT | 3.4  | 2.403486411 |
| NT | 3.5  | 3.176157179 |
| NT | 3.5  | 3.674623157 |
| NT | 3.5  | 3.729098498 |
| NT | 3.5  | 3.863118668 |
| NT | 3.5  | 4.013171598 |
| NT | 3.5  | 52.14014418 |
| NT | 3.6  | 3.988985859 |
| NT | 3.6  | 22.85844216 |
| NT | 3.7  | 1.956676533 |
| NT | 3.7  | 2.488558769 |
| NT | 3.7  | 3.062405003 |
| NT | 3.7  | 3.21963121  |
| NT | 3.7  | 4.121153521 |
| NT | 3.8  | 2.180745684 |
| NT | 3.8  | 3.578295693 |
| NT | 3.9  | 1.804770965 |
| NT | 3.9  | 1.969185866 |
| NT | 3.9  | 3.13980416  |
| NT | 3.9  | 4.017326708 |
| NT | 4    | 1.97518754  |
| NT | 4    | 2.155281343 |
| NT | 4    | 2.312532534 |
| NT | 4    | 2.369955901 |
| NT | 4    | 3.001632142 |
| NT | 4    | 3.035910229 |
| NT | 4    | 3.162297562 |
| NT | 4    | 3.165910577 |
| NT | 4    | 3.209253803 |
| NT | 4    | 3.268787247 |
| NT | 4    | 3.330264295 |
| NT | 4    | 3.334068127 |
| NT | 4    | 3.446656781 |
| NT | 4    | 3.449996278 |
| NT | 4    | 3.453196764 |
| NT | 4    | 3.500549273 |
| NT | 4    | 3.538178541 |
| NT | 4    | 3.549589742 |
| NT | 4    | 3.560902866 |
| NT | 4    | 3.576465419 |
| NT | 4    | 3.595601079 |
| NT | 4    | 3.663242355 |
| NT | 4    | 3.727917468 |
| NT | 4    | 3.919293816 |
| NT | 4    | 3.931256002 |
| NT | 4    | 3.934049957 |
| NT | 4    | 3.942381628 |
| NT | 4    | 4.03955931  |
| NT | 4    | 4.04155467  |
| NT | 4    | 4.182377597 |
| NT | 4    | 4.305044762 |
| NT | 4    | 4.320458772 |
| NT | 4    | 4.336846167 |
| NT | 4    | 4.568312784 |
| NT | 4    | 4.761193131 |
| NT | 4    | 5.319044143 |
| NT | 4    | 5.360238492 |
| NT | 4    | 5.460635416 |
| NT | 4    | 5.911139101 |
| NT | 4    | 6.00018324  |
| NT | 4    | 6.325710133 |
| NT | 4    | 6.393501289 |

|    |      |             |
|----|------|-------------|
| NT | 4    | 6.46400138  |
| NT | 4    | 6.539415531 |
| NT | 4    | 6.542432331 |
| NT | 4    | 6.77397484  |
| NT | 4    | 7.381714843 |
| NT | 4    | 7.642111227 |
| NT | 4    | 26.83158226 |
| NT | 4    | 31.18423432 |
| NT | 4    | 31.93567471 |
| NT | 4    | 32.77252145 |
| NT | 4    | 34.94060116 |
| NT | 4    | 42.65409714 |
| NT | 4.11 | 3.530142893 |
| NT | 4.2  | 40.49379522 |
| NT | 4.3  | 2.531207666 |
| NT | 4.4  | 3.081995469 |
| NT | 4.5  | 3.855618992 |
| NT | 4.5  | 4.558662497 |
| NT | 4.6  | 3.729066908 |
| NT | 4.6  | 3.941108805 |
| NT | 4.8  | 8.198543519 |
| NT | 5    | 1.779374799 |
| NT | 5    | 1.960054005 |
| NT | 5    | 2.23192553  |
| NT | 5    | 2.274562796 |
| NT | 5    | 2.318702236 |
| NT | 5    | 2.529072717 |
| NT | 5    | 2.59340738  |
| NT | 5    | 2.720803256 |
| NT | 5    | 3.545759516 |
| NT | 5    | 3.551165591 |
| NT | 5    | 3.566991558 |
| NT | 5    | 3.753826963 |
| NT | 5    | 3.779157468 |
| NT | 5    | 3.835106653 |
| NT | 5    | 3.838940274 |
| NT | 5    | 3.843121613 |
| NT | 5    | 3.855016116 |
| NT | 5    | 3.884759476 |
| NT | 5    | 3.885291206 |
| NT | 5    | 3.929529776 |
| NT | 5    | 3.957240167 |
| NT | 5    | 3.986315841 |
| NT | 5    | 4.120403337 |
| NT | 5    | 4.225559412 |
| NT | 5    | 4.303574183 |
| NT | 5    | 4.457678686 |
| NT | 5    | 4.474272206 |
| NT | 5    | 4.513108152 |
| NT | 5    | 4.567099875 |
| NT | 5    | 5.280376621 |
| NT | 5    | 6.099407285 |
| NT | 5    | 6.107140258 |
| NT | 5    | 6.315563351 |
| NT | 5    | 6.44383876  |
| NT | 5    | 6.537914693 |
| NT | 5    | 6.566197895 |
| NT | 5    | 7.189236011 |
| NT | 5    | 7.344994649 |
| NT | 5    | 7.407147057 |
| NT | 5    | 7.498388872 |
| NT | 5    | 7.519505322 |
| NT | 5    | 7.744149044 |
| NT | 5    | 7.774069093 |
| NT | 5    | 34.91505537 |
| NT | 5    | 34.99903204 |
| NT | 5    | 35.20352845 |
| NT | 5    | 42.79600634 |
| NT | 5    | 61.22160375 |
| NT | 5    | 67.92561226 |
| NT | 5.1  | 3.438383316 |
| NT | 5.1  | 3.586860816 |
| NT | 5.1  | 3.653374915 |

|    |      |             |
|----|------|-------------|
| NT | 5.1  | 3.719629387 |
| NT | 5.1  | 4.06150803  |
| NT | 5.1  | 6.589319445 |
| NT | 5.1  | 7.576136485 |
| NT | 5.11 | 57.3894909  |
| NT | 5.3  | 3.807884693 |
| NT | 5.4  | 5.576240718 |
| NT | 5.4  | 62.56624103 |
| NT | 5.5  | 3.509460691 |
| NT | 5.5  | 27.16703516 |
| NT | 5.6  | 2.553116535 |
| NT | 5.6  | 7.493157342 |
| NT | 5.6  | 38.61759573 |
| NT | 5.7  | 5.913600937 |
| NT | 5.8  | 42.68576851 |
| NT | 5.9  | 31.83459243 |
| NT | 6    | 0.486279997 |
| NT | 6    | 3.15604235  |
| NT | 6    | 3.309690128 |
| NT | 6    | 3.354013935 |
| NT | 6    | 3.502078725 |
| NT | 6    | 3.532104532 |
| NT | 6    | 3.58487343  |
| NT | 6    | 3.699030104 |
| NT | 6    | 3.715537553 |
| NT | 6    | 3.73593047  |
| NT | 6    | 3.948203666 |
| NT | 6    | 3.950219825 |
| NT | 6    | 3.995464588 |
| NT | 6    | 4.001797477 |
| NT | 6    | 4.117739655 |
| NT | 6    | 4.344349908 |
| NT | 6    | 4.374739226 |
| NT | 6    | 4.453845091 |
| NT | 6    | 4.768686704 |
| NT | 6    | 5.328547433 |
| NT | 6    | 5.429568201 |
| NT | 6    | 5.491458021 |
| NT | 6    | 6.106683865 |
| NT | 6    | 6.25036563  |
| NT | 6    | 6.415077552 |
| NT | 6    | 6.499116704 |
| NT | 6    | 6.671043731 |
| NT | 6    | 6.682326384 |
| NT | 6    | 7.058818936 |
| NT | 6    | 7.162552673 |
| NT | 6    | 7.244620018 |
| NT | 6    | 7.360554837 |
| NT | 6    | 7.42443613  |
| NT | 6    | 7.544490479 |
| NT | 6    | 7.607961401 |
| NT | 6    | 26.81040175 |
| NT | 6    | 31.16697593 |
| NT | 6    | 31.68879889 |
| NT | 6    | 34.90814565 |
| NT | 6    | 38.39183072 |
| NT | 6    | 38.92448997 |
| NT | 6    | 43.26228207 |
| NT | 6    | 47.34735973 |
| NT | 6    | 35.47001575 |
| NT | 6.1  | 3.765263552 |
| NT | 6.1  | 4.023228779 |
| NT | 6.1  | 7.412595868 |
| NT | 6.1  | 8.784032546 |
| NT | 6.1  | 47.95186661 |
| NT | 6.11 | 3.446768507 |
| NT | 6.11 | 4.046571968 |
| NT | 6.11 | 5.103651352 |
| NT | 6.11 | 6.584584005 |
| NT | 6.2  | 5.285838753 |
| NT | 6.3  | 4.009606101 |
| NT | 6.3  | 4.856508374 |
| NT | 6.3  | 6.148170888 |

|    |      |             |
|----|------|-------------|
| NT | 6.3  | 6.226273403 |
| NT | 6.3  | 28.25573952 |
| NT | 6.3  | 82.16958302 |
| NT | 6.4  | 6.503220096 |
| NT | 6.4  | 7.180370361 |
| NT | 6.5  | 23.52753642 |
| NT | 6.5  | 52.54075468 |
| NT | 6.6  | 3.145264802 |
| NT | 6.6  | 3.540997232 |
| NT | 6.6  | 5.519839016 |
| NT | 6.6  | 6.781930033 |
| NT | 6.6  | 8.404903509 |
| NT | 6.6  | 52.70533599 |
| NT | 6.7  | 63.07433881 |
| NT | 6.8  | 4.78792916  |
| NT | 7    | 3.131669355 |
| NT | 7    | 3.82147599  |
| NT | 7    | 3.962634784 |
| NT | 7    | 4.003436729 |
| NT | 7    | 4.437029396 |
| NT | 7    | 4.578022629 |
| NT | 7    | 4.624758559 |
| NT | 7    | 4.790863365 |
| NT | 7    | 5.243742332 |
| NT | 7    | 5.569822319 |
| NT | 7    | 5.887372568 |
| NT | 7    | 6.263387211 |
| NT | 7    | 6.413942993 |
| NT | 7    | 6.676628213 |
| NT | 7    | 7.677997641 |
| NT | 7    | 7.678637169 |
| NT | 7.1  | 3.763747563 |
| NT | 7.2  | 53.84473443 |
| NT | 7.3  | 3.132457415 |
| NT | 7.3  | 3.422572571 |
| NT | 7.3  | 31.56373563 |
| NT | 7.4  | 43.13162628 |
| NT | 7.4  | 57.62435235 |
| NT | 7.5  | 3.112055426 |
| NT | 7.5  | 6.822186589 |
| NT | 7.5  | 7.409681    |
| NT | 7.5  | 7.695746616 |
| NT | 7.5  | 62.74466619 |
| NT | 7.6  | 3.15945105  |
| NT | 7.6  | 6.194381803 |
| NT | 7.6  | 7.247949436 |
| NT | 7.6  | 35.97218405 |
| NT | 7.8  | 47.3497697  |
| NT | 8    | 3.953659018 |
| NT | 8    | 3.991396    |
| NT | 8    | 4.17714576  |
| NT | 8    | 4.558316827 |
| NT | 8    | 4.669973622 |
| NT | 8    | 5.401487619 |
| NT | 8    | 5.94328694  |
| NT | 8    | 6.221544012 |
| NT | 8    | 8.270407736 |
| NT | 8    | 8.567906357 |
| NT | 8    | 38.62195185 |
| NT | 8    | 38.76929824 |
| NT | 8    | 62.63769113 |
| NT | 8.11 | 7.771798279 |
| NT | 8.2  | 47.74887018 |
| NT | 8.3  | 3.822458744 |
| NT | 8.3  | 9.630596191 |
| NT | 8.3  | 35.42342876 |
| NT | 8.4  | 6.724911198 |
| NT | 8.4  | 27.3035804  |
| NT | 8.4  | 35.62927192 |
| NT | 8.5  | 5.718995713 |
| NT | 8.5  | 47.47516915 |
| NT | 8.6  | 2.297761204 |
| NT | 8.6  | 7.415941283 |

|          |      |             |
|----------|------|-------------|
| NT       | 8.6  | 8.429633021 |
| NT       | 8.6  | 35.42397942 |
| NT       | 8.8  | 6.422391549 |
| NT       | 9    | 4.032637601 |
| NT       | 9    | 4.44376656  |
| NT       | 9    | 6.264302731 |
| NT       | 9    | 7.374531351 |
| NT       | 9    | 8.313376736 |
| NT       | 9    | 8.451855559 |
| NT       | 9    | 8.501022313 |
| NT       | 9.1  | 31.8006908  |
| NT       | 9.4  | 4.817738314 |
| NT       | 9.6  | 3.354520847 |
| NT       | 9.6  | 57.06053339 |
| NT       | 9.7  | 3.856545771 |
| NT       | 10   | 4.343403948 |
| NT       | 10   | 4.470079993 |
| NT       | 10   | 6.462623708 |
| NT       | 10   | 6.6969634   |
| NT       | 10   | 7.324179351 |
| NT       | 10   | 7.640650049 |
| NT       | 10   | 7.810621612 |
| NT       | 10   | 8.456500515 |
| NT       | 10   | 8.524332032 |
| NT       | 10   | 8.622698203 |
| NT       | 10   | 8.641267918 |
| NT       | 10   | 8.857038129 |
| NT       | 10   | 8.986138605 |
| NT       | 10   | 14.05543176 |
| NT       | 10.1 | 3.207058276 |
| NT       | 11   | 8.880952284 |
| NT       | 12   | 5.513352126 |
| NT       | 12   | 8.393864058 |
| NT       | 12   | 15.91727522 |
| NT       | 12   | 35.7308249  |
| NT       | 12   | 38.67477627 |
| NT       | 12   | 23.84917989 |
| NT       | 14   | 13.31918075 |
| NT       | 15   | 6.639530703 |
| NT-adult | 16   | 6.62644159  |
| NT-adult | 16   | 10.3384876  |
| NT-adult | 16   | 14.81856329 |
| NT-adult | 18   | 35.22878225 |
| NT-adult | 18   | 35.27905016 |
| NT-adult | 20   | 5.115192011 |
| NT-adult | 20   | 7.595294051 |
| NT-adult | 20   | 15.23135571 |
| NT-adult | 20   | 17.47241873 |
| NT-adult | 20   | 35.20237386 |
| NT-adult | 21   | 23.26303528 |
| NT-adult | 22   | 30.60271771 |
| NT-adult | 23   | 3.833688798 |
| NT-adult | 23   | 6.113175362 |
| NT-adult | 23   | 8.396139041 |
| NT-adult | 23   | 24.05636355 |
| NT-adult | 23   | 25.58359872 |
| NT-adult | 23   | 25.69227237 |
| NT-adult | 24   | 22.92748238 |
| NT-adult | 24   | 35.18252164 |











**Table13 Summary of the statistical results of the 20 significant changed microbial taxa across age**

| Row.names                       | 1       |          |          | 2       |          |             | 3       |          |          | 4        |          |          | 5       |          |          | 6        |          |          | 7        |          |         | 8           |             |         | 9        |          |         |          |          |
|---------------------------------|---------|----------|----------|---------|----------|-------------|---------|----------|----------|----------|----------|----------|---------|----------|----------|----------|----------|----------|----------|----------|---------|-------------|-------------|---------|----------|----------|---------|----------|----------|
|                                 | mean NT | mean ASD | p-value  | mean NT | mean ASD | p-value     | mean NT | mean ASD | p-value  | mean NT  | mean ASD | p-value  | mean NT | mean ASD | p-value  | mean NT  | mean ASD | p-value  | mean NT  | mean ASD | p-value | mean NT     | mean ASD    | p-value | mean NT  | mean ASD | p-value |          |          |
| g_Lachnospiraceae_UCG-004       |         |          |          |         |          |             | 0.44%   | 0.77%    | 0.025199 | 0.45%    | 0.95%    | 0.020612 |         |          |          |          |          |          |          |          |         |             |             |         |          |          |         |          |          |
| g_Escherichia-Shigella          |         |          |          |         |          |             |         |          |          |          |          |          |         |          | 5.40%    | 7.38%    | 0.001517 |          |          |          | 6.77%   | 2.27%       | 0.025688    |         |          |          |         |          |          |
| g_Butyricoccus                  |         |          |          |         |          |             |         |          |          |          |          |          |         |          |          |          |          |          |          |          |         |             |             |         |          |          |         |          |          |
| g_Faecalibacterium              | 11.98%  | 4.12%    | 0.03829  |         |          |             |         | 17.55%   | 13.00%   | 0.013482 |          |          |         |          |          |          |          |          |          |          |         |             |             |         | 0.46%    | 0.24%    | 0.01217 |          |          |
| g_Parabacteroides               |         |          |          |         |          |             |         |          |          |          |          |          |         |          |          |          |          |          |          |          |         |             |             |         |          |          |         |          |          |
| f_Enterobacteriaceae            |         |          |          |         |          |             |         |          |          |          |          | 2.75%    | 6.82%   | 0.014322 |          |          |          | 4.99%    | 5.13%    | 0.004266 | 7.21%   | 3.53%       | 1.13724E-05 | 1.75%   | 2.48%    | 0.011476 | 1.69%   | 1.70%    | 0.019414 |
| g_Lachnospiraceae_NK4A136_group |         |          |          |         |          |             |         |          |          |          |          |          |         |          |          |          |          |          |          |          |         |             |             |         |          |          |         |          |          |
| g_Bifidobacterium               |         |          |          |         |          |             |         |          |          |          |          | 2.70%    | 5.00%   | 0.007976 |          |          |          |          |          |          |         |             |             |         |          |          |         |          |          |
| g_Haemophilus                   |         |          |          |         |          |             | 0.29%   | 0.83%    | 0.047153 |          |          |          |         |          |          |          |          |          |          |          |         |             |             |         |          |          |         |          |          |
| g_Veillonella                   | 10.25%  | 19.99%   | 0.032053 | 1.69%   | 10.47%   | 5.7118E-05  | 3.60%   | 8.03%    | 0.003709 | 0.80%    | 5.48%    | 8.03E-05 | 0.76%   | 6.52%    | 0.001105 | 0.66%    | 3.87%    | 0.030332 |          |          |         |             |             |         |          | 0.25%    | 0.50%   | 0.039359 |          |
| f_Ruminococcaceae               | 0.03%   | 0.14%    | 0.030366 |         |          |             |         | 0.16%    | 0.09%    | 0.015762 |          |          |         |          |          |          |          |          |          |          |         |             |             |         |          |          | 0.47%   | 2.76%    | 0.047391 |
| g_Anaerostipes                  |         |          |          |         |          |             |         |          |          |          | 0.23%    | 0.43%    | 0.00098 |          |          |          |          |          |          |          |         |             |             |         |          |          |         |          |          |
| g_Lachnospira                   |         |          |          |         |          |             |         |          |          |          |          |          |         |          |          |          | 1.56%    | 3.01%    | 0.024705 | 1.65%    | 2.58%   | 0.028512499 |             |         |          |          |         |          |          |
| g_Blautia                       |         |          |          |         |          |             |         |          |          |          |          |          |         | 1.43%    | 0.71%    | 0.002988 |          |          |          |          |         |             |             |         |          |          |         |          |          |
| g_Granulicatella                |         |          |          |         |          |             |         |          |          |          |          |          |         | 0.08%    | 0.08%    | 0.01799  |          |          |          | 0.01%    | 0.06%   | 0.003949691 | 0.01%       | 0.05%   | 0.020742 |          |         |          |          |
| g_Romboutsia                    |         |          |          |         |          |             |         |          | 0.15%    | 0.17%    | 0.014176 |          |         | 0.11%    | 0.33%    | 0.032767 |          |          |          |          |         |             |             |         |          |          |         |          |          |
| g_Actinomyces                   |         |          |          |         |          |             |         |          |          |          |          |          |         | 0.05%    | 0.32%    | 0.007576 |          |          |          |          |         |             |             |         |          |          | 0.04%   | 0.12%    | 0.011881 |
| g_Roseburia                     |         |          |          |         |          |             |         |          |          |          |          |          |         |          |          |          | 3.08%    | 3.30%    | 0.022073 |          |         |             |             |         |          |          |         |          |          |
| g_Incertae Sedis                |         |          |          |         |          |             |         |          |          |          |          |          |         | 0.22%    | 0.21%    | 0.025056 |          |          |          |          |         |             |             |         |          |          |         |          |          |
| g_Hungatella                    |         |          |          | 0.13%   | 0.80%    | 0.000636712 |         |          |          |          |          |          |         |          |          |          |          |          |          |          |         |             |             |         |          | 0.07%    | 0.35%   | 0.017442 |          |

**Total proportion of the 20 microbial taxa in different age brackets**

| age bracket | 1      | 2      | 3      | 4      | 5      | 6      | 7      | 8      | 9      |
|-------------|--------|--------|--------|--------|--------|--------|--------|--------|--------|
| NT          | 65.91% | 40.10% | 50.53% | 40.04% | 37.16% | 38.59% | 40.97% | 33.41% | 35.09% |
| ASD         | 62.42% | 55.85% | 50.09% | 45.66% | 46.73% | 46.45% | 39.02% | 37.09% | 35.70% |

Table 14 Summary of the statistical results of the 39 significant changed GBM across age

| No. | Row name                                             | 1        |          |          | 2        |          |          | 3        |          |          | 4       |          |         | 5        |          |          | 6       |          |         | 7       |          |         | 8       |          |         | 9        |          |          |
|-----|------------------------------------------------------|----------|----------|----------|----------|----------|----------|----------|----------|----------|---------|----------|---------|----------|----------|----------|---------|----------|---------|---------|----------|---------|---------|----------|---------|----------|----------|----------|
|     |                                                      | mean NT  | mean ASD | p-value  | mean NT  | mean ASD | p-value  | mean NT  | mean ASD | p-value  | mean NT | mean ASD | p-value | mean NT  | mean ASD | p-value  | mean NT | mean ASD | p-value | mean NT | mean ASD | p-value | mean NT | mean ASD | p-value | mean NT  | mean ASD | p-value  |
| 1   | MGB004 Kynurenine synthesis                          | 1092.797 | 297.3598 | 0.021074 |          |          |          |          |          |          |         |          |         |          |          |          |         |          |         |         |          |         |         |          |         |          |          |          |
| 2   | MGB025 Nitric oxide synthesis I (NO synthase)        | 48.63158 | 3.12     | 0.00303  |          |          |          |          |          |          |         |          |         |          |          |          |         |          |         |         |          |         |         |          |         |          |          |          |
| 3   | MGB045 Acetate synthesis III                         |          |          |          | 78271.83 | 94693.84 | 0.039124 |          |          |          |         |          |         |          |          |          |         |          |         |         |          |         |         |          |         |          |          |          |
| 4   | MGB047 Acetate degradation                           |          |          |          | 34185.86 | 33968.58 | 0.035049 |          |          |          |         |          |         |          |          |          |         |          |         |         |          |         |         |          |         |          |          |          |
| 5   | MGB050 Glutamate degradation I                       |          |          |          | 5282.641 | 14521.4  | 5.68E-05 |          |          |          |         |          |         | 4234.183 | 11689.16 | 0.028959 |         |          |         |         |          |         |         |          |         |          |          |          |
| 6   | MGB028 Nitric oxide degradation II (NO reductase)    |          |          |          | 1300.1   | 6200.144 | 0.142984 | 1576.387 | 4628.157 | 0.023838 |         |          |         | 715.2168 | 4315.926 | 0.012537 |         |          |         |         |          |         |         |          |         |          |          |          |
| 7   | MGB009 Histamine synthesis                           |          |          |          | 6216.852 | 5725.541 | 0.171932 |          |          |          |         |          |         |          |          |          |         |          |         |         |          |         |         |          |         |          |          |          |
| 8   | MGB031 17- $\beta$ -Estradiol degradation            |          |          |          | 56799.02 | 52701.34 | 0.044281 |          |          |          |         |          |         |          |          |          |         |          |         |         |          |         |         |          |         |          |          |          |
| 9   | MGB055 Propionate synthesis III                      |          |          |          | 35100.37 | 47227.69 | 0.015738 |          |          |          |         |          |         |          |          |          |         |          |         |         |          |         |         |          |         | 34050.77 | 53703.55 | 0.000129 |
| 10  | MGB044 Acetate synthesis II                          |          |          |          | 69193.54 | 44421.63 | 0.033508 |          |          |          |         |          |         |          |          |          |         |          |         |         |          |         |         |          |         |          |          |          |
| 11  | MGB034 Isovaleric acid synthesis I (KADH pathway)    |          |          |          | 21377.53 | 29567.96 | 0.001956 |          |          |          |         |          |         |          |          |          |         |          |         |         |          |         |         |          |         |          |          |          |
| 12  | MGB024 DOPAC synthesis                               |          |          |          | 19395.03 | 16628.75 | 0.001334 |          |          |          |         |          |         |          |          |          |         |          |         |         |          |         |         |          |         |          |          |          |
| 13  | MGB051 Glutamate degradation II                      |          |          |          | 6278.562 | 3765.424 | 0.021857 | 5264.89  | 4397.712 | 0.008437 |         |          |         |          |          |          |         |          |         |         |          |         |         |          |         |          |          |          |
| 14  | MGB015 p-Cresol synthesis                            |          |          |          |          |          |          |          |          |          |         |          |         |          |          |          |         |          |         |         |          |         |         |          |         |          |          |          |
| 15  | MGB056 Propionate degradation I                      |          |          |          |          |          |          |          |          |          |         |          |         |          |          |          |         |          |         |         |          |         |         |          |         |          |          |          |
| 16  | MGB023 Dopamine degradation                          |          |          |          |          |          |          |          |          |          |         |          |         |          |          |          |         |          |         |         |          |         |         |          |         |          |          |          |
| 17  | MGB021 GABA synthesis II                             |          |          |          |          |          |          |          |          |          |         |          |         |          |          |          |         |          |         |         |          |         |         |          |         |          |          |          |
| 18  | MGB020 GABA synthesis I                              |          |          |          |          |          |          |          |          |          |         |          |         |          |          |          |         |          |         |         |          |         |         |          |         |          |          |          |
| 19  | MGB016 p-Cresol degradation                          |          |          |          |          |          |          |          |          |          |         |          |         |          |          |          |         |          |         |         |          |         |         |          |         |          |          |          |
| 20  | MGB048 Propionate synthesis I                        |          |          |          |          |          |          |          |          |          |         |          |         |          |          |          |         |          |         |         |          |         |         |          |         |          |          |          |
| 21  | MGB010 Histamine degradation                         |          |          |          |          |          |          |          |          |          |         |          |         |          |          |          |         |          |         |         |          |         |         |          |         |          |          |          |
| 22  | MGB026 Nitric oxide synthesis II (nitrite reductase) |          |          |          |          |          |          |          |          |          |         |          |         |          |          |          |         |          |         |         |          |         |         |          |         |          |          |          |
| 23  | MGB052 Butyrate synthesis I                          |          |          |          |          |          |          |          |          |          |         |          |         |          |          |          |         |          |         |         |          |         |         |          |         |          |          |          |
| 24  | MGB007 Glutamate synthesis II                        |          |          |          |          |          |          |          |          |          |         |          |         |          |          |          |         |          |         |         |          |         |         |          |         |          |          |          |
| 25  | MGB038 Inositol degradation                          |          |          |          |          |          |          |          |          |          |         |          |         |          |          |          |         |          |         |         |          |         |         |          |         |          |          |          |
| 26  | MGB006 Glutamate synthesis I                         |          |          |          |          |          |          |          |          |          |         |          |         |          |          |          |         |          |         |         |          |         |         |          |         |          |          |          |
| 27  | MGB033 Quinolinic acid degradation                   |          |          |          |          |          |          |          |          |          |         |          |         |          |          |          |         |          |         |         |          |         |         |          |         |          |          |          |
| 28  | MGB035 Isovaleric acid synthesis II (KADC pathway)   |          |          |          |          |          |          |          |          |          |         |          |         |          |          |          |         |          |         |         |          |         |         |          |         |          |          |          |
| 29  | MGB036 S-Adenosylmethionine (SAM) synthesis          |          |          |          |          |          |          |          |          |          |         |          |         |          |          |          |         |          |         |         |          |         |         |          |         |          |          |          |
| 30  | MGB049 Tryptophan degradation                        |          |          |          |          |          |          |          |          |          |         |          |         |          |          |          |         |          |         |         |          |         |         |          |         |          |          |          |
| 31  | MGB037 Inositol synthesis                            |          |          |          |          |          |          |          |          |          |         |          |         |          |          |          |         |          |         |         |          |         |         |          |         |          |          |          |
| 32  | MGB027 Nitric oxide degradation I (NO dioxygenase)   |          |          |          |          |          |          |          |          |          |         |          |         |          |          |          |         |          |         |         |          |         |         |          |         |          |          |          |
| 33  | MGB019 GABA degradation                              |          |          |          |          |          |          |          |          |          |         |          |         |          |          |          |         |          |         |         |          |         |         |          |         |          |          |          |
| 34  | MGB005 Tryptophan synthesis                          |          |          |          |          |          |          |          |          |          |         |          |         |          |          |          |         |          |         |         |          |         |         |          |         |          |          |          |
| 35  | MGB040 Menquinone synthesis (vitamin K2) I           |          |          |          |          |          |          |          |          |          |         |          |         |          |          |          |         |          |         |         |          |         |         |          |         |          |          |          |
| 36  | MGB029 ClpB (ATP-dependent chaperone protein)        |          |          |          |          |          |          |          |          |          |         |          |         |          |          |          |         |          |         |         |          |         |         |          |         |          |          |          |
| 37  | MGB032 Quinolinic acid synthesis                     |          |          |          |          |          |          |          |          |          |         |          |         |          |          |          |         |          |         |         |          |         |         |          |         |          |          |          |
| 38  | MGB039 g-Hydroxybutyric acid (GHB) degradation       |          |          |          |          |          |          |          |          |          |         |          |         |          |          |          |         |          |         |         |          |         |         |          |         |          |          |          |
| 39  | MGB043 Acetate synthesis I                           |          |          |          |          |          |          |          |          |          |         |          |         |          |          |          |         |          |         |         |          |         |         |          |         |          |          |          |

Table S5 Summary of the statistical results of the 286 significant changed METACYC across age

Table with 18 columns: No, Row name, Higher level functional annotation, mean NT, mean ASO, p-value, and columns 2 through 18. The table lists 286 metabolic pathways and their associated statistical data across different age groups.

Table with 27 columns and 275 rows listing gene identifiers, descriptions, and associated numerical data. The table is densely packed with text and numbers, organized into columns.



Table 16 Summary of the statistical results of correlations between bacterial taxa and clinical phenotypes according to Spearman's rank correlations analysis

Table with columns for taxonomic group (e.g., g. Veillonella, f. Faecalibacterium), clinical phenotype (e.g., age, BMI score, positive faecal SCFA production), and Spearman's rank correlation coefficients (rho) for various conditions. The table is organized into brackets (1-23 mo, 24-36 mo, etc.) and includes a detailed header for the correlation analysis.



Table 17 Summary of the statistical results of correlations between GIMs and clinical phenotypes according to spearman's rank correlations analysis

| Age bracket              | Gene                                             | Group     | ASD score | Repetitive | Social | Language | any GI prob | GI problem | sephageal | peptic ulcer | Dyspepsia | abdominal | abdominal | constipation | abnormal | within 1 mo | any sleep | deep | difficult | fat | sleep | fragm | short | Shallow | any neonate | food allergy | skin allergy | respiratory | Antibiotic | within 3 months |  |  |
|--------------------------|--------------------------------------------------|-----------|-----------|------------|--------|----------|-------------|------------|-----------|--------------|-----------|-----------|-----------|--------------|----------|-------------|-----------|------|-----------|-----|-------|-------|-------|---------|-------------|--------------|--------------|-------------|------------|-----------------|--|--|
| age bracket 1 (11-23 mo) | MOR25 Nitric oxide synthase I (NO synthase)      | p-value   |           |            |        |          |             |            |           |              |           |           |           |              |          |             |           |      |           |     |       |       |       |         |             |              |              |             |            |                 |  |  |
|                          | RHO                                              | 0.039539  |           |            |        |          |             |            |           |              |           |           |           |              |          |             |           |      |           |     |       |       |       |         |             |              |              |             |            |                 |  |  |
| age bracket 2 (24-35 mo) | MOR50 Glutamate degradation I                    | p-value   |           |            |        |          |             |            |           |              |           |           |           |              |          |             |           |      |           |     |       |       |       |         |             |              |              |             |            |                 |  |  |
|                          | RHO                                              | 0.251453  |           |            |        |          |             |            |           |              |           |           |           |              |          |             |           |      |           |     |       |       |       |         |             |              |              |             |            |                 |  |  |
| age bracket 3 (36-47 mo) | MOR34 Isovaleric acid synthase II (KADH pathway) | p-value   |           |            |        |          |             |            |           |              |           |           |           |              |          |             |           |      |           |     |       |       |       |         |             |              |              |             |            |                 |  |  |
|                          | RHO                                              | 0.157589  |           |            |        |          |             |            |           |              |           |           |           |              |          |             |           |      |           |     |       |       |       |         |             |              |              |             |            |                 |  |  |
| age bracket 4 (48-59 mo) | MOR16 p-Cresol degradation                       | p-value   |           |            |        |          |             |            |           |              |           |           |           |              |          |             |           |      |           |     |       |       |       |         |             |              |              |             |            |                 |  |  |
|                          | RHO                                              | 0.004352  |           |            |        |          |             |            |           |              |           |           |           |              |          |             |           |      |           |     |       |       |       |         |             |              |              |             |            |                 |  |  |
| age bracket 5 (6-8 y)    | MOR38 Inositol degradation                       | p-value   |           |            |        |          |             |            |           |              |           |           |           |              |          |             |           |      |           |     |       |       |       |         |             |              |              |             |            |                 |  |  |
|                          | RHO                                              | 0.249315  |           |            |        |          |             |            |           |              |           |           |           |              |          |             |           |      |           |     |       |       |       |         |             |              |              |             |            |                 |  |  |
| age bracket 6 (9-10 y)   | MOR20 GABA synthesis I                           | p-value   |           |            |        |          |             |            |           |              |           |           |           |              |          |             |           |      |           |     |       |       |       |         |             |              |              |             |            |                 |  |  |
|                          | RHO                                              | 0.0165376 |           |            |        |          |             |            |           |              |           |           |           |              |          |             |           |      |           |     |       |       |       |         |             |              |              |             |            |                 |  |  |
| age bracket 7 (11-12 y)  | MOR20 GABA synthesis I                           | p-value   |           |            |        |          |             |            |           |              |           |           |           |              |          |             |           |      |           |     |       |       |       |         |             |              |              |             |            |                 |  |  |
|                          | RHO                                              | 0.0165376 |           |            |        |          |             |            |           |              |           |           |           |              |          |             |           |      |           |     |       |       |       |         |             |              |              |             |            |                 |  |  |
| age bracket 8 (13-14 y)  | MOR20 GABA synthesis I                           | p-value   |           |            |        |          |             |            |           |              |           |           |           |              |          |             |           |      |           |     |       |       |       |         |             |              |              |             |            |                 |  |  |
|                          | RHO                                              | 0.0165376 |           |            |        |          |             |            |           |              |           |           |           |              |          |             |           |      |           |     |       |       |       |         |             |              |              |             |            |                 |  |  |



Table S3 Summary of the statistical results of correlations between METACYC and clinical phenotypes according to spearman's rank correlations analysis

Table with columns for pathway name, direction, p-value, rank, and Spearman's correlation coefficient. It lists various metabolic pathways such as PWW-7527 L-methionine salvage cycle II and PWW-1298 Nucleoside degradation, along with their associated p-values and correlation coefficients.

| Gene                     | Gene ID                                                               | Enzyme | EC         | Pathway  | KEGG ID  | KEGG Pathway | KEGG Link | log2(FC) |      | log2(FC) |      | log2(FC) |      | log2(FC) |      | log2(FC) |      | log2(FC) |      | log2(FC) |      |         |
|--------------------------|-----------------------------------------------------------------------|--------|------------|----------|----------|--------------|-----------|----------|------|----------|------|----------|------|----------|------|----------|------|----------|------|----------|------|---------|
|                          |                                                                       |        |            |          |          |              |           | Protein  | Gene | Protein  | Gene | Protein  | Gene | Protein  | Gene | Protein  | Gene | Protein  | Gene | Protein  | Gene | Protein |
| age bracket 4<br>(4-5 y) | GLYCOL-GLYOXIDE-PWY superpathway of glycol metabolism and degradation | PFKP   | 1.14931771 | PFKP     | 0.000261 | 0.000261     | 0.000261  | 0.000261 |      |          |      |          |      |          |      |          |      |          |      |          |      |         |
|                          |                                                                       | PFKL   | 0.000261   | 0.000261 | 0.000261 | 0.000261     |           |          |      |          |      |          |      |          |      |          |      |          |      |          |      |         |
|                          |                                                                       | PFFB   | 0.000261   | 0.000261 | 0.000261 | 0.000261     |           |          |      |          |      |          |      |          |      |          |      |          |      |          |      |         |
|                          |                                                                       | PFDL   | 0.000261   | 0.000261 | 0.000261 | 0.000261     |           |          |      |          |      |          |      |          |      |          |      |          |      |          |      |         |
|                          |                                                                       | PFB    | 0.000261   | 0.000261 | 0.000261 | 0.000261     |           |          |      |          |      |          |      |          |      |          |      |          |      |          |      |         |
|                          |                                                                       | PFKL   | 0.000261   | 0.000261 | 0.000261 | 0.000261     |           |          |      |          |      |          |      |          |      |          |      |          |      |          |      |         |
|                          |                                                                       | PFKL   | 0.000261   | 0.000261 | 0.000261 | 0.000261     |           |          |      |          |      |          |      |          |      |          |      |          |      |          |      |         |
|                          |                                                                       | PFKL   | 0.000261   | 0.000261 | 0.000261 | 0.000261     |           |          |      |          |      |          |      |          |      |          |      |          |      |          |      |         |
|                          |                                                                       | PFKL   | 0.000261   | 0.000261 | 0.000261 | 0.000261     |           |          |      |          |      |          |      |          |      |          |      |          |      |          |      |         |
|                          |                                                                       | PFKL   | 0.000261   | 0.000261 | 0.000261 | 0.000261     |           |          |      |          |      |          |      |          |      |          |      |          |      |          |      |         |
| age bracket 5<br>(6-9 y) | GLYCOL-GLYOXIDE-PWY superpathway of glycol metabolism and degradation | PFKP   | 0.000261   | 0.000261 | 0.000261 | 0.000261     |           |          |      |          |      |          |      |          |      |          |      |          |      |          |      |         |
|                          |                                                                       | PFKL   | 0.000261   | 0.000261 | 0.000261 | 0.000261     |           |          |      |          |      |          |      |          |      |          |      |          |      |          |      |         |
|                          |                                                                       | PFFB   | 0.000261   | 0.000261 | 0.000261 | 0.000261     |           |          |      |          |      |          |      |          |      |          |      |          |      |          |      |         |
|                          |                                                                       | PFDL   | 0.000261   | 0.000261 | 0.000261 | 0.000261     |           |          |      |          |      |          |      |          |      |          |      |          |      |          |      |         |
|                          |                                                                       | PFB    | 0.000261   | 0.000261 | 0.000261 | 0.000261     |           |          |      |          |      |          |      |          |      |          |      |          |      |          |      |         |
|                          |                                                                       | PFKL   | 0.000261   | 0.000261 | 0.000261 | 0.000261     |           |          |      |          |      |          |      |          |      |          |      |          |      |          |      |         |
|                          |                                                                       | PFKL   | 0.000261   | 0.000261 | 0.000261 | 0.000261     |           |          |      |          |      |          |      |          |      |          |      |          |      |          |      |         |
|                          |                                                                       | PFKL   | 0.000261   | 0.000261 | 0.000261 | 0.000261     |           |          |      |          |      |          |      |          |      |          |      |          |      |          |      |         |
|                          |                                                                       | PFKL   | 0.000261   | 0.000261 | 0.000261 | 0.000261     |           |          |      |          |      |          |      |          |      |          |      |          |      |          |      |         |
|                          |                                                                       | PFKL   | 0.000261   | 0.000261 | 0.000261 | 0.000261     |           |          |      |          |      |          |      |          |      |          |      |          |      |          |      |         |





Table containing metabolic pathway descriptions (e.g., PWW-733, PWW-728) and their corresponding numerical values across multiple columns. Includes sub-sections like 'age bracket 9 (9-)', '< 3y', and '> 3y'.

|  |                                                                              |                  |            |            |            |            |            |  |  |            |            |            |  |  |  |           |            |            |  |  |            |            |  |  |  |  |
|--|------------------------------------------------------------------------------|------------------|------------|------------|------------|------------|------------|--|--|------------|------------|------------|--|--|--|-----------|------------|------------|--|--|------------|------------|--|--|--|--|
|  |                                                                              |                  |            |            |            |            |            |  |  |            | 0.06114281 |            |  |  |  | 0.0282771 | 0.06728292 |            |  |  | 0.03811595 |            |  |  |  |  |
|  | FADN-ELONG-FWY fatty acid elongation - saturated                             | -2.0297          | 0.00501193 | 0.00698381 | 0.01613801 | 0.00113180 | 0.01007651 |  |  |            |            |            |  |  |  |           |            |            |  |  |            |            |  |  |  |  |
|  |                                                                              | SDC <sup>2</sup> | 0.11242031 | 0.1086721  | 0.32242921 | 0.32092922 | 0.36742494 |  |  |            |            | 0.02142482 |  |  |  |           |            |            |  |  |            | 0.05819274 |  |  |  |  |
|  |                                                                              | -2.0297          | 0.11242031 | 0.1086721  | 0.32242921 | 0.32092922 | 0.36742494 |  |  | 0.02098882 |            |            |  |  |  |           | 0.0282771  | 0.06728292 |  |  |            | 0.03811595 |  |  |  |  |
|  | DENOVOPURINE2-FWY superpathway of purine nucleotides de novo biosynthesis II | -2.0297          | 0.11242031 | 0.1086721  | 0.32242921 | 0.32092922 | 0.36742494 |  |  | 0.02098882 |            |            |  |  |  |           | 0.0282771  | 0.06728292 |  |  |            | 0.03811595 |  |  |  |  |
|  |                                                                              | SDC <sup>2</sup> | 0.11242031 | 0.1086721  | 0.32242921 | 0.32092922 | 0.36742494 |  |  | 0.02098882 |            |            |  |  |  |           | 0.0282771  | 0.06728292 |  |  |            | 0.03811595 |  |  |  |  |
|  |                                                                              | -2.0297          | 0.11242031 | 0.1086721  | 0.32242921 | 0.32092922 | 0.36742494 |  |  | 0.02098882 |            |            |  |  |  |           | 0.0282771  | 0.06728292 |  |  |            | 0.03811595 |  |  |  |  |
|  | CDDN-FWY reductive amination of lysine pathway                               | -2.0297          | 0.11242031 | 0.1086721  | 0.32242921 | 0.32092922 | 0.36742494 |  |  | 0.02098882 |            |            |  |  |  |           | 0.0282771  | 0.06728292 |  |  |            | 0.03811595 |  |  |  |  |
|  |                                                                              | SDC <sup>2</sup> | 0.11242031 | 0.1086721  | 0.32242921 | 0.32092922 | 0.36742494 |  |  | 0.02098882 |            |            |  |  |  |           | 0.0282771  | 0.06728292 |  |  |            | 0.03811595 |  |  |  |  |
|  |                                                                              | -2.0297          | 0.11242031 | 0.1086721  | 0.32242921 | 0.32092922 | 0.36742494 |  |  | 0.02098882 |            |            |  |  |  |           | 0.0282771  | 0.06728292 |  |  |            | 0.03811595 |  |  |  |  |
|  | ARGONA-FWY L-arginine biosynthesis Lys L- ornithine                          | -2.0297          | 0.11242031 | 0.1086721  | 0.32242921 | 0.32092922 | 0.36742494 |  |  | 0.02098882 |            |            |  |  |  |           | 0.0282771  | 0.06728292 |  |  |            | 0.03811595 |  |  |  |  |
|  |                                                                              | SDC <sup>2</sup> | 0.11242031 | 0.1086721  | 0.32242921 | 0.32092922 | 0.36742494 |  |  | 0.02098882 |            |            |  |  |  |           | 0.0282771  | 0.06728292 |  |  |            | 0.03811595 |  |  |  |  |
|  |                                                                              | -2.0297          | 0.11242031 | 0.1086721  | 0.32242921 | 0.32092922 | 0.36742494 |  |  | 0.02098882 |            |            |  |  |  |           | 0.0282771  | 0.06728292 |  |  |            | 0.03811595 |  |  |  |  |
|  |                                                                              | SDC <sup>2</sup> | 0.11242031 | 0.1086721  | 0.32242921 | 0.32092922 | 0.36742494 |  |  | 0.02098882 |            |            |  |  |  |           | 0.0282771  | 0.06728292 |  |  |            | 0.03811595 |  |  |  |  |
|  |                                                                              | -2.0297          | 0.11242031 | 0.1086721  | 0.32242921 | 0.32092922 | 0.36742494 |  |  | 0.02098882 |            |            |  |  |  |           | 0.0282771  | 0.06728292 |  |  |            | 0.03811595 |  |  |  |  |
|  |                                                                              | SDC <sup>2</sup> | 0.11242031 | 0.1086721  | 0.32242921 | 0.32092922 | 0.36742494 |  |  | 0.02098882 |            |            |  |  |  |           | 0.0282771  | 0.06728292 |  |  |            | 0.03811595 |  |  |  |  |
